# Supplementary material for: MyoMiner: explore gene co-expression in normal and pathological muscle
Source: BMC Med Genomics. 2020 May 11;13:67. doi: 10.1186/s12920-020-0712-3 (PMC7216615; doi:10.1186/s12920-020-0712-3)
Supplement: Supplementary file 2 — Additional file 2. Table S7. Complete listing of data series IDs for human experiments. [file 12920_2020_712_MOESM2_ESM.xlsx]

## Sheet: Sheet1
Series	Batch dates	Array Data File	R cel names	Condition	Condition 2	Age	Sex	Anatomic part 1	Anatomic part 2	Extra 1	Extra 2	Extra 3
E-AFMX-11	04/15/04	hh3.cel	hh3.cel	normal		72 years	F	heart	left ventricle
E-AFMX-11	04/15/04	hh6.cel	hh6.cel	normal		51 years	M	heart	left ventricle
E-AFMX-11	04/15/04	hh4.cel	hh4.cel	normal		27 years	M	heart	left ventricle
E-AFMX-11	04/15/04	hh5.cel	hh5.cel	normal		24 years	M	heart	left ventricle
E-AFMX-11	04/15/04	hh2.cel	hh2.cel	normal		21 years	M	heart	left ventricle
E-AFMX-11	04/15/04	hh1.cel	hh1.cel	normal		29 years	M	heart	left ventricle
E-GEOD-10685	03/31/05	GSM269932.CEL	GSM269932.CEL	normal		25 years	M	skeletal muscle	quadriceps
E-GEOD-10685	03/31/05	GSM269811.CEL	GSM269811.CEL	normal		25 years	M	skeletal muscle	quadriceps
E-GEOD-10685	03/31/05	GSM269808.CEL	GSM269808.CEL	normal		25 years	M	skeletal muscle	quadriceps
E-GEOD-10685	04/01/05	GSM269933.CEL	GSM269933.CEL	IL-6 infusion 3 hours		25 years	M	skeletal muscle	quadriceps
E-GEOD-10685	04/01/05	GSM269834.CEL	GSM269834.CEL	IL-6 infusion 3 hours		25 years	M	skeletal muscle	quadriceps
E-GEOD-10685	04/01/05	GSM269809.CEL	GSM269809.CEL	IL-6 infusion 3 hours		25 years	M	skeletal muscle	quadriceps
E-GEOD-10685	04/01/05	GSM269934.CEL	GSM269934.CEL	IL-6 infusion 6 hours		25 years	M	skeletal muscle	quadriceps
E-GEOD-10685	04/01/05	GSM269835.CEL	GSM269835.CEL	IL-6 infusion 6 hours		25 years	M	skeletal muscle	quadriceps
E-GEOD-10685	04/01/05	GSM269810.CEL	GSM269810.CEL	IL-6 infusion 6 hours		25 years	M	skeletal muscle	quadriceps
E-GEOD-1145	05/13/04	GSM25813_PAF_1.cel	GSM25813_PAF_1.cel	familial cardiomyopathy			M	heart	left ventricle
E-GEOD-1145	05/13/04	GSM25814_PAF_2.cel	GSM25814_PAF_2.cel	familial cardiomyopathy			M	heart	left ventricle
E-GEOD-1145	05/13/04	GSM25815_PAF_3.cel	GSM25815_PAF_3.cel	familial cardiomyopathy			F	heart	left ventricle
E-GEOD-1145	05/13/04	GSM25816_PAF_4.cel	GSM25816_PAF_4.cel	familial cardiomyopathy			M	heart	left ventricle
E-GEOD-1145	05/13/04	GSM25817_PAF_6.cel	GSM25817_PAF_6.cel	familial cardiomyopathy			M	heart	left ventricle
E-GEOD-1145	05/13/04	GSM25818_PAH_1.cel	GSM25818_PAH_1.cel	hypertrophic cardiomyopathy			M	heart	left ventricle
E-GEOD-1145	05/13/04	GSM25819_PAH_2.cel	GSM25819_PAH_2.cel	hypertrophic cardiomyopathy			M	heart	left ventricle
E-GEOD-1145	05/13/04	GSM25820_PAH_3.cel	GSM25820_PAH_3.cel	hypertrophic cardiomyopathy			M	heart	left ventricle
E-GEOD-1145	05/13/04	GSM25821_PAH_4.cel	GSM25821_PAH_4.cel	hypertrophic cardiomyopathy			F	heart	left ventricle
E-GEOD-1145	05/13/04	GSM25822_PAH_5.cel	GSM25822_PAH_5.cel	hypertrophic cardiomyopathy			M	heart	left ventricle
E-GEOD-1145	05/12/04	GSM25801_PAD_1.cel	GSM25801_PAD_1.cel	idiopathic cardiomyopathy			M	heart	left ventricle
E-GEOD-1145	05/12/04	GSM25802_PAD_2.cel	GSM25802_PAD_2.cel	idiopathic cardiomyopathy			F	heart	left ventricle
E-GEOD-1145	05/12/04	GSM25803_PAD_3.cel	GSM25803_PAD_3.cel	idiopathic cardiomyopathy			M	heart	left ventricle
E-GEOD-1145	05/12/04	GSM25804_PAD_4.cel	GSM25804_PAD_4.cel	idiopathic cardiomyopathy			M	heart	left ventricle
E-GEOD-1145	03/16/04	GSM25805_PAD_5.cel	GSM25805_PAD_5.cel	idiopathic cardiomyopathy			F	heart	left ventricle
E-GEOD-1145	03/16/04	GSM25806_PAD_6.cel	GSM25806_PAD_6.cel	idiopathic cardiomyopathy			M	heart	left ventricle
E-GEOD-1145	05/12/04	GSM25807_PAD_7.cel	GSM25807_PAD_7.cel	idiopathic cardiomyopathy			M	heart	left ventricle
E-GEOD-1145	05/12/04	GSM25808_PAD_9.cel	GSM25808_PAD_9.cel	idiopathic cardiomyopathy			F	heart	left ventricle
E-GEOD-1145	05/12/04	GSM25809_PAD_10.cel	GSM25809_PAD_10.cel	idiopathic cardiomyopathy			M	heart	left ventricle
E-GEOD-1145	05/12/04	GSM25810_PAD_12.cel	GSM25810_PAD_12.cel	idiopathic cardiomyopathy			M	heart	left ventricle
E-GEOD-1145	05/12/04	GSM25811_PAD_13.cel	GSM25811_PAD_13.cel	idiopathic cardiomyopathy			M	heart	left ventricle
E-GEOD-1145	05/12/04	GSM25812_PAD_15.cel	GSM25812_PAD_15.cel	idiopathic cardiomyopathy			M	heart	left ventricle
E-GEOD-1145	11/04/03	GSM18422_PA-D_102.cel	GSM18422_PA.D_102.cel	idiopathic cardiomyopathy			F	heart	left ventricle
E-GEOD-1145	11/04/03	GSM18423_PA-D_132.cel	GSM18423_PA.D_132.cel	idiopathic cardiomyopathy			M	heart	left ventricle
E-GEOD-1145	11/04/03	GSM18424_PA-D_206.cel	GSM18424_PA.D_206.cel	idiopathic cardiomyopathy			M	heart	left ventricle
E-GEOD-1145	11/04/03	GSM18425_PA-D_216.cel	GSM18425_PA.D_216.cel	idiopathic cardiomyopathy			F	heart	left ventricle
E-GEOD-1145	11/04/03	GSM18426_PA-D_225.cel	GSM18426_PA.D_225.cel	idiopathic cardiomyopathy			F	heart	left ventricle
E-GEOD-1145	11/04/03	GSM18427_PA-D_229.cel	GSM18427_PA.D_229.cel	idiopathic cardiomyopathy			M	heart	left ventricle
E-GEOD-1145	11/04/03	GSM18428_PA-D_317.cel	GSM18428_PA.D_317.cel	idiopathic cardiomyopathy			F	heart	left ventricle
E-GEOD-1145	11/04/03	GSM18429_PA-D_319.cel	GSM18429_PA.D_319.cel	idiopathic cardiomyopathy			F	heart	left ventricle
E-GEOD-1145	11/04/03	GSM18430_PA-D_348.cel	GSM18430_PA.D_348.cel	idiopathic cardiomyopathy			M	heart	left ventricle
E-GEOD-1145	11/04/03	GSM18431_PA-D_374.cel	GSM18431_PA.D_374.cel	idiopathic cardiomyopathy			F	heart	left ventricle
E-GEOD-1145	11/04/03	GSM18432_PA-D_64.cel	GSM18432_PA.D_64.cel	idiopathic cardiomyopathy			M	heart	left ventricle
E-GEOD-1145	11/19/03	GSM18433_PA-D_82.cel	GSM18433_PA.D_82.cel	idiopathic cardiomyopathy			M	heart	left ventricle
E-GEOD-1145	11/04/03	GSM18434_PA-D_85.cel	GSM18434_PA.D_85.cel	idiopathic cardiomyopathy			M	heart	left ventricle
E-GEOD-1145	11/04/03	GSM18436_PA-D_98.cel	GSM18436_PA.D_98.cel	idiopathic cardiomyopathy			F	heart	left ventricle
E-GEOD-1145	11/06/03	GSM18477_PA-S_115.cel	GSM18477_PA.S_115.cel	ischemic cardiomyopathy			M	heart	left ventricle
E-GEOD-1145	11/06/03	GSM18478_PA-S_224.cel	GSM18478_PA.S_224.cel	ischemic cardiomyopathy			M	heart	left ventricle
E-GEOD-1145	11/06/03	GSM18479_PA-S_233.cel	GSM18479_PA.S_233.cel	ischemic cardiomyopathy			M	heart	left ventricle
E-GEOD-1145	11/19/03	GSM18480_PA-S_242_2.cel	GSM18480_PA.S_242_2.cel	ischemic cardiomyopathy			M	heart	left ventricle
E-GEOD-1145	11/06/03	GSM18481_PA-S_267.cel	GSM18481_PA.S_267.cel	ischemic cardiomyopathy			M	heart	left ventricle
E-GEOD-1145	11/06/03	GSM18482_PA-S_281.cel	GSM18482_PA.S_281.cel	ischemic cardiomyopathy			F	heart	left ventricle
E-GEOD-1145	11/06/03	GSM18483_PA-S_297.cel	GSM18483_PA.S_297.cel	ischemic cardiomyopathy			M	heart	left ventricle
E-GEOD-1145	11/06/03	GSM18484_PA-S_314.cel	GSM18484_PA.S_314.cel	ischemic cardiomyopathy			F	heart	left ventricle
E-GEOD-1145	11/06/03	GSM18485_PA-S_342.cel	GSM18485_PA.S_342.cel	ischemic cardiomyopathy			M	heart	left ventricle
E-GEOD-1145	11/06/03	GSM18486_PA-S_386.cel	GSM18486_PA.S_386.cel	ischemic cardiomyopathy			M	heart	left ventricle
E-GEOD-1145	11/06/03	GSM18487_PA-S_464.cel	GSM18487_PA.S_464.cel	ischemic cardiomyopathy			M	heart	left ventricle
E-GEOD-1145	05/11/04	GSM25828_PAS_1.cel	GSM25828_PAS_1.cel	ischemic cardiomyopathy			M	heart	left ventricle
E-GEOD-1145	05/11/04	GSM25829_PAS_2.cel	GSM25829_PAS_2.cel	ischemic cardiomyopathy			M	heart	left ventricle
E-GEOD-1145	05/11/04	GSM25830_PAS_3.cel	GSM25830_PAS_3.cel	ischemic cardiomyopathy			M	heart	left ventricle
E-GEOD-1145	05/13/04	GSM25831_PAS_5.cel	GSM25831_PAS_5.cel	ischemic cardiomyopathy			M	heart	left ventricle
E-GEOD-1145	05/11/04	GSM25832_PAS_6.cel	GSM25832_PAS_6.cel	ischemic cardiomyopathy			M	heart	left ventricle
E-GEOD-1145	05/11/04	GSM25833_PAS_7.cel	GSM25833_PAS_7.cel	ischemic cardiomyopathy			M	heart	left ventricle
E-GEOD-1145	05/11/04	GSM25834_PAS_8.cel	GSM25834_PAS_8.cel	ischemic cardiomyopathy			M	heart	left ventricle
E-GEOD-1145	05/11/04	GSM25835_PAS_9.cel	GSM25835_PAS_9.cel	ischemic cardiomyopathy			F	heart	left ventricle
E-GEOD-1145	05/13/04	GSM25836_PAS_10.cel	GSM25836_PAS_10.cel	ischemic cardiomyopathy			M	heart	left ventricle
E-GEOD-1145	05/11/04	GSM25837_PAS_11.cel	GSM25837_PAS_11.cel	ischemic cardiomyopathy			M	heart	left ventricle
E-GEOD-1145	05/11/04	GSM25838_PAS_12.cel	GSM25838_PAS_12.cel	ischemic cardiomyopathy			M	heart	left ventricle
E-GEOD-1145	05/11/04	GSM25839_PAS_13.cel	GSM25839_PAS_13.cel	ischemic cardiomyopathy			F	heart	left ventricle
E-GEOD-1145	05/11/04	GSM25840_PAS_14.cel	GSM25840_PAS_14.cel	ischemic cardiomyopathy			M	heart	left ventricle
E-GEOD-1145	05/11/04	GSM25841_PAS_15.cel	GSM25841_PAS_15.cel	ischemic cardiomyopathy			M	heart	left ventricle
E-GEOD-1145	05/11/04	GSM25842_PAS_16.cel	GSM25842_PAS_16.cel	ischemic cardiomyopathy			M	heart	left ventricle
E-GEOD-1145	05/11/04	GSM25843_PAS_17.cel	GSM25843_PAS_17.cel	ischemic cardiomyopathy			M	heart	left ventricle
E-GEOD-1145	05/11/04	GSM25844_PAS_18.cel	GSM25844_PAS_18.cel	ischemic cardiomyopathy			M	heart	left ventricle
E-GEOD-1145	05/11/04	GSM25845_PAS_19.cel	GSM25845_PAS_19.cel	ischemic cardiomyopathy			F	heart	left ventricle
E-GEOD-1145	05/11/04	GSM25846_PAS_20.cel	GSM25846_PAS_20.cel	ischemic cardiomyopathy			M	heart	left ventricle
E-GEOD-1145	05/11/04	GSM25847_PAS_21.cel	GSM25847_PAS_21.cel	ischemic cardiomyopathy			M	heart	left ventricle
E-GEOD-1145	11/05/03	GSM18442_PA-N_112-1.cel	GSM18442_PA.N_112.1.cel	normal			F	heart	left ventricle
E-GEOD-1145	11/05/03	GSM18443_PA-N_118.cel	GSM18443_PA.N_118.cel	normal			M	heart	left ventricle
E-GEOD-1145	11/05/03	GSM18444_PA-N_148.cel	GSM18444_PA.N_148.cel	normal			M	heart	left ventricle
E-GEOD-1145	11/05/03	GSM18445_PA-N_200.cel	GSM18445_PA.N_200.cel	normal			M	heart	left ventricle
E-GEOD-1145	11/05/03	GSM18446_PA-N_249.cel	GSM18446_PA.N_249.cel	normal			F	heart	left ventricle
E-GEOD-1145	11/05/03	GSM18447_PA-N_291.cel	GSM18447_PA.N_291.cel	normal			F	heart	left ventricle
E-GEOD-1145	11/05/03	GSM18448_PA-N_294.cel	GSM18448_PA.N_294.cel	normal			M	heart	left ventricle
E-GEOD-1145	11/05/03	GSM18449_PA-N_300.cel	GSM18449_PA.N_300.cel	normal			M	heart	left ventricle
E-GEOD-1145	11/05/03	GSM18450_PA-N_322.cel	GSM18450_PA.N_322.cel	normal			M	heart	left ventricle
E-GEOD-1145	11/05/03	GSM18451_PA-N_325.cel	GSM18451_PA.N_325.cel	normal			M	heart	left ventricle
E-GEOD-1145	11/05/03	GSM18452_PA-N_326.cel	GSM18452_PA.N_326.cel	normal			F	heart	left ventricle
E-GEOD-1145	05/13/04	GSM25823_PAP_4.cel	GSM25823_PAP_4.cel	post-partum cardiomyopathy			F	heart	left ventricle
E-GEOD-1145	05/13/04	GSM25825_PAP_5.cel	GSM25825_PAP_5.cel	post-partum cardiomyopathy			M	heart	left ventricle
E-GEOD-1145	05/13/04	GSM25826_PAP_6.cel	GSM25826_PAP_6.cel	post-partum cardiomyopathy			F	heart	left ventricle
E-GEOD-1145	05/13/04	GSM25827_PAP_7.cel	GSM25827_PAP_7.cel	post-partum cardiomyopathy			F	heart	left ventricle
E-GEOD-1145	05/12/04	GSM25848_PAV_1.cel	GSM25848_PAV_1.cel	viral cardiomyopathy			M	heart	left ventricle
E-GEOD-1145	05/12/04	GSM25849_PAV_2.cel	GSM25849_PAV_2.cel	viral cardiomyopathy			M	heart	left ventricle
E-GEOD-1145	05/12/04	GSM25850_PAV_3.cel	GSM25850_PAV_3.cel	viral cardiomyopathy			M	heart	left ventricle
E-GEOD-1145	05/12/04	GSM25851_PAV_4.cel	GSM25851_PAV_4.cel	viral cardiomyopathy			M	heart	left ventricle
E-GEOD-1145	05/12/04	GSM25852_PAV_5.cel	GSM25852_PAV_5.cel	viral cardiomyopathy			M	heart	left ventricle
E-GEOD-1145	05/13/04	GSM25853_PAV_6.cel	GSM25853_PAV_6.cel	viral cardiomyopathy			M	heart	left ventricle
E-GEOD-1145	05/12/04	GSM25854_PAV_7.cel	GSM25854_PAV_7.cel	viral cardiomyopathy			M	heart	left ventricle
E-GEOD-12474	05/18/07	GSM313324.CEL	GSM313324.CEL	normal			M	skeletal muscle	quadriceps
E-GEOD-12474	05/19/07	GSM313323.CEL	GSM313323.CEL	heat and stream generating sheets for 2 months			M	skeletal muscle	quadriceps
E-GEOD-12474	05/19/07	GSM313322.CEL	GSM313322.CEL	heat and stream generating sheets for 2 months			M	skeletal muscle	quadriceps
E-GEOD-12474	05/18/07	GSM313321.CEL	GSM313321.CEL	heat and stream generating sheets for 2 months			M	skeletal muscle	quadriceps
E-GEOD-12474	05/18/07	GSM313320.CEL	GSM313320.CEL	heat and stream generating sheets for 2 months			M	skeletal muscle	quadriceps
E-GEOD-12474	05/18/07	GSM313319.CEL	GSM313319.CEL	heat and stream generating sheets for 2 months			M	skeletal muscle	quadriceps
E-GEOD-12474	05/19/07	GSM313318.CEL	GSM313318.CEL	normal			M	skeletal muscle	quadriceps
E-GEOD-12474	05/19/07	GSM313317.CEL	GSM313317.CEL	normal			M	skeletal muscle	quadriceps
E-GEOD-12474	05/18/07	GSM313316.CEL	GSM313316.CEL	normal			M	skeletal muscle	quadriceps
E-GEOD-12474	05/18/07	GSM313315.CEL	GSM313315.CEL	normal			M	skeletal muscle	quadriceps
E-GEOD-12485	03/16/07	GSM313626.CEL	GSM313626.CEL	ischemic cardiomyopathy	Post-operative off-pump		M	heart	left ventricle
E-GEOD-12485	03/16/07	GSM313628.CEL	GSM313628.CEL	ischemic cardiomyopathy	Post-operative off-pump		M	heart	left ventricle
E-GEOD-12485	07/06/06	GSM313625.CEL	GSM313625.CEL	ischemic cardiomyopathy	Post-operative off-pump		M	heart	left ventricle
E-GEOD-12485	03/16/07	GSM313627.CEL	GSM313627.CEL	ischemic cardiomyopathy	Post-operative off-pump		M	heart	left ventricle
E-GEOD-12485	07/06/06	GSM313624.CEL	GSM313624.CEL	ischemic cardiomyopathy	Post-operative off-pump		M	heart	left ventricle
E-GEOD-12485	07/06/06	GSM313620.CEL	GSM313620.CEL	ischemic cardiomyopathy	Pre-operative off-pump		M	heart	left ventricle
E-GEOD-12485	03/16/07	GSM313623.CEL	GSM313623.CEL	ischemic cardiomyopathy	Pre-operative off-pump		M	heart	left ventricle
E-GEOD-12485	03/16/07	GSM313621.CEL	GSM313621.CEL	ischemic cardiomyopathy	Pre-operative off-pump		M	heart	left ventricle
E-GEOD-12485	03/16/07	GSM313622.CEL	GSM313622.CEL	ischemic cardiomyopathy	Pre-operative off-pump		M	heart	left ventricle
E-GEOD-12485	07/06/06	GSM313601.CEL	GSM313601.CEL	ischemic cardiomyopathy	Pre-operative off-pump		M	heart	left ventricle
E-GEOD-12486	07/06/06	GSM313638.CEL	GSM313638.CEL	ischemic cardiomyopathy	Post-operative on-pump		M	heart	left ventricle
E-GEOD-12486	12/08/06	GSM313641.CEL	GSM313641.CEL	ischemic cardiomyopathy	Post-operative on-pump		M	heart	left ventricle
E-GEOD-12486	06/12/08	GSM313642.CEL	GSM313642.CEL	ischemic cardiomyopathy	Post-operative on-pump		M	heart	left ventricle
E-GEOD-12486	10/27/06	GSM313640.CEL	GSM313640.CEL	ischemic cardiomyopathy	Post-operative on-pump		M	heart	left ventricle
E-GEOD-12486	07/06/06	GSM313639.CEL	GSM313639.CEL	ischemic cardiomyopathy	Post-operative on-pump		M	heart	left ventricle
E-GEOD-12486	07/06/06	GSM313631.CEL	GSM313631.CEL	ischemic cardiomyopathy	Pre-operative on-pump		M	heart	left ventricle
E-GEOD-12486	12/08/06	GSM313635.CEL	GSM313635.CEL	ischemic cardiomyopathy	Pre-operative on-pump		M	heart	left ventricle
E-GEOD-12486	06/12/08	GSM313637.CEL	GSM313637.CEL	ischemic cardiomyopathy	Pre-operative on-pump		M	heart	left ventricle
E-GEOD-12486	07/06/06	GSM313629.CEL	GSM313629.CEL	ischemic cardiomyopathy	Pre-operative on-pump		M	heart	left ventricle
E-GEOD-13070	04/07/05	GSM342623.CEL	GSM342623.CEL	insulin resistant	post hyperinsulinemic-euglycemic clamp	51 years	M	skeletal muscle	quadriceps	thiazolidinedione (TZD) PPAR-gamma ligand treatment for 3 months	no response to treatment
E-GEOD-13070	09/28/04	GSM342629.CEL	GSM342629.CEL	insulin resistant	post hyperinsulinemic-euglycemic clamp	51 years	M	skeletal muscle	quadriceps	thiazolidinedione (TZD) PPAR-gamma ligand treatment for 3 months	no response to treatment
E-GEOD-13070	08/24/04	GSM342668.CEL	GSM342668.CEL	insulin resistant	post hyperinsulinemic-euglycemic clamp	51 years	M	skeletal muscle	quadriceps	thiazolidinedione (TZD) PPAR-gamma ligand treatment for 3 months	no response to treatment
E-GEOD-13070	08/25/04	GSM342680.CEL	GSM342680.CEL	insulin resistant	post hyperinsulinemic-euglycemic clamp	51 years	F	skeletal muscle	quadriceps	thiazolidinedione (TZD) PPAR-gamma ligand treatment for 3 months	no response to treatment
E-GEOD-13070	08/12/04	GSM342756.CEL	GSM342756.CEL	insulin resistant	post hyperinsulinemic-euglycemic clamp	51 years	M	skeletal muscle	quadriceps	thiazolidinedione (TZD) PPAR-gamma ligand treatment for 3 months	no response to treatment
E-GEOD-13070	04/05/05	GSM342792.CEL	GSM342792.CEL	insulin resistant	post hyperinsulinemic-euglycemic clamp	51 years	F	skeletal muscle	quadriceps	thiazolidinedione (TZD) PPAR-gamma ligand treatment for 3 months	no response to treatment
E-GEOD-13070	09/22/04	GSM342816.CEL	GSM342816.CEL	insulin resistant	post hyperinsulinemic-euglycemic clamp	51 years	M	skeletal muscle	quadriceps	thiazolidinedione (TZD) PPAR-gamma ligand treatment for 3 months	no response to treatment
E-GEOD-13070	08/24/04	GSM342834.CEL	GSM342834.CEL	insulin resistant	post hyperinsulinemic-euglycemic clamp	51 years	M	skeletal muscle	quadriceps	thiazolidinedione (TZD) PPAR-gamma ligand treatment for 3 months	no response to treatment
E-GEOD-13070	08/10/04	GSM342869.CEL	GSM342869.CEL	insulin resistant	post hyperinsulinemic-euglycemic clamp	51 years	M	skeletal muscle	quadriceps	thiazolidinedione (TZD) PPAR-gamma ligand treatment for 3 months	no response to treatment
E-GEOD-13070	10/28/04	GSM342887.CEL	GSM342887.CEL	insulin resistant	post hyperinsulinemic-euglycemic clamp	51 years	M	skeletal muscle	quadriceps	thiazolidinedione (TZD) PPAR-gamma ligand treatment for 3 months	no response to treatment
E-GEOD-13070	08/12/04	GSM342910.CEL	GSM342910.CEL	insulin resistant	post hyperinsulinemic-euglycemic clamp	51 years	M	skeletal muscle	quadriceps	thiazolidinedione (TZD) PPAR-gamma ligand treatment for 3 months	no response to treatment
E-GEOD-13070	08/24/04	GSM342930.CEL	GSM342930.CEL	insulin resistant	post hyperinsulinemic-euglycemic clamp	51 years	M	skeletal muscle	quadriceps	thiazolidinedione (TZD) PPAR-gamma ligand treatment for 3 months	no response to treatment
E-GEOD-13070	05/10/05	GSM342726.CEL	GSM342726.CEL	insulin resistant	post hyperinsulinemic-euglycemic clamp	51 years	M	skeletal muscle	quadriceps	thiazolidinedione (TZD) PPAR-gamma ligand treatment for 3 months	response to treatment
E-GEOD-13070	05/11/05	GSM342732.CEL	GSM342732.CEL	insulin resistant	post hyperinsulinemic-euglycemic clamp	51 years	M	skeletal muscle	quadriceps	thiazolidinedione (TZD) PPAR-gamma ligand treatment for 3 months	response to treatment
E-GEOD-13070	07/07/05	GSM342744.CEL	GSM342744.CEL	insulin resistant	post hyperinsulinemic-euglycemic clamp	51 years	M	skeletal muscle	quadriceps	thiazolidinedione (TZD) PPAR-gamma ligand treatment for 3 months	response to treatment
E-GEOD-13070	08/11/04	GSM342762.CEL	GSM342762.CEL	insulin resistant	post hyperinsulinemic-euglycemic clamp	51 years	M	skeletal muscle	quadriceps	thiazolidinedione (TZD) PPAR-gamma ligand treatment for 3 months	response to treatment
E-GEOD-13070	08/11/04	GSM342768.CEL	GSM342768.CEL	insulin resistant	post hyperinsulinemic-euglycemic clamp	51 years	M	skeletal muscle	quadriceps	thiazolidinedione (TZD) PPAR-gamma ligand treatment for 3 months	response to treatment
E-GEOD-13070	04/05/05	GSM342798.CEL	GSM342798.CEL	insulin resistant	post hyperinsulinemic-euglycemic clamp	51 years	F	skeletal muscle	quadriceps	thiazolidinedione (TZD) PPAR-gamma ligand treatment for 3 months	response to treatment
E-GEOD-13070	04/06/05	GSM342828.CEL	GSM342828.CEL	insulin resistant	post hyperinsulinemic-euglycemic clamp	51 years	F	skeletal muscle	quadriceps	thiazolidinedione (TZD) PPAR-gamma ligand treatment for 3 months	response to treatment
E-GEOD-13070	09/28/04	GSM342839.CEL	GSM342839.CEL	insulin resistant	post hyperinsulinemic-euglycemic clamp	51 years	M	skeletal muscle	quadriceps	thiazolidinedione (TZD) PPAR-gamma ligand treatment for 3 months	response to treatment
E-GEOD-13070	04/05/05	GSM342881.CEL	GSM342881.CEL	insulin resistant	post hyperinsulinemic-euglycemic clamp	51 years	M	skeletal muscle	quadriceps	thiazolidinedione (TZD) PPAR-gamma ligand treatment for 3 months	response to treatment
E-GEOD-13070	09/09/04	GSM342885.CEL	GSM342885.CEL	insulin resistant	post hyperinsulinemic-euglycemic clamp	51 years	M	skeletal muscle	quadriceps	thiazolidinedione (TZD) PPAR-gamma ligand treatment for 3 months	response to treatment
E-GEOD-13070	10/21/04	GSM342611.CEL	GSM342611.CEL	insulin resistant	post hyperinsulinemic-euglycemic clamp	51 years	M	skeletal muscle	quadriceps	thiazolidinedione (TZD) PPAR-gamma ligand treatment for 3 months	response to treatment
E-GEOD-13070	05/16/05	GSM342617.CEL	GSM342617.CEL	insulin resistant	post hyperinsulinemic-euglycemic clamp	51 years	M	skeletal muscle	quadriceps	thiazolidinedione (TZD) PPAR-gamma ligand treatment for 3 months	unspecified response to treatment
E-GEOD-13070	08/24/04	GSM342635.CEL	GSM342635.CEL	insulin resistant	post hyperinsulinemic-euglycemic clamp	51 years	M	skeletal muscle	quadriceps	thiazolidinedione (TZD) PPAR-gamma ligand treatment for 3 months	unspecified response to treatment
E-GEOD-13070	08/13/04	GSM342645.CEL	GSM342645.CEL	insulin resistant	post hyperinsulinemic-euglycemic clamp	51 years	M	skeletal muscle	quadriceps	thiazolidinedione (TZD) PPAR-gamma ligand treatment for 3 months	unspecified response to treatment
E-GEOD-13070	08/11/04	GSM342651.CEL	GSM342651.CEL	insulin resistant	post hyperinsulinemic-euglycemic clamp	51 years	M	skeletal muscle	quadriceps	thiazolidinedione (TZD) PPAR-gamma ligand treatment for 3 months	unspecified response to treatment
E-GEOD-13070	04/07/05	GSM342656.CEL	GSM342656.CEL	insulin resistant	post hyperinsulinemic-euglycemic clamp	51 years	M	skeletal muscle	quadriceps	thiazolidinedione (TZD) PPAR-gamma ligand treatment for 3 months	unspecified response to treatment
E-GEOD-13070	09/28/04	GSM342662.CEL	GSM342662.CEL	insulin resistant	post hyperinsulinemic-euglycemic clamp	51 years	M	skeletal muscle	quadriceps	thiazolidinedione (TZD) PPAR-gamma ligand treatment for 3 months	unspecified response to treatment
E-GEOD-13070	09/28/04	GSM342674.CEL	GSM342674.CEL	insulin resistant	post hyperinsulinemic-euglycemic clamp	51 years	M	skeletal muscle	quadriceps	thiazolidinedione (TZD) PPAR-gamma ligand treatment for 3 months	unspecified response to treatment
E-GEOD-13070	08/11/04	GSM342774.CEL	GSM342774.CEL	insulin resistant	post hyperinsulinemic-euglycemic clamp	51 years	M	skeletal muscle	quadriceps	thiazolidinedione (TZD) PPAR-gamma ligand treatment for 3 months	unspecified response to treatment
E-GEOD-13070	08/12/04	GSM342780.CEL	GSM342780.CEL	insulin resistant	post hyperinsulinemic-euglycemic clamp	51 years	M	skeletal muscle	quadriceps	thiazolidinedione (TZD) PPAR-gamma ligand treatment for 3 months	unspecified response to treatment
E-GEOD-13070	08/13/04	GSM342804.CEL	GSM342804.CEL	insulin resistant	post hyperinsulinemic-euglycemic clamp	51 years	F	skeletal muscle	quadriceps	thiazolidinedione (TZD) PPAR-gamma ligand treatment for 3 months	unspecified response to treatment
E-GEOD-13070	08/24/04	GSM342822.CEL	GSM342822.CEL	insulin resistant	post hyperinsulinemic-euglycemic clamp	51 years	M	skeletal muscle	quadriceps	thiazolidinedione (TZD) PPAR-gamma ligand treatment for 3 months	unspecified response to treatment
E-GEOD-13070	04/06/05	GSM342845.CEL	GSM342845.CEL	insulin resistant	post hyperinsulinemic-euglycemic clamp	51 years	M	skeletal muscle	quadriceps	thiazolidinedione (TZD) PPAR-gamma ligand treatment for 3 months	unspecified response to treatment
E-GEOD-13070	10/28/04	GSM342851.CEL	GSM342851.CEL	insulin resistant	post hyperinsulinemic-euglycemic clamp	51 years	M	skeletal muscle	quadriceps	thiazolidinedione (TZD) PPAR-gamma ligand treatment for 3 months	unspecified response to treatment
E-GEOD-13070	12/08/04	GSM342863.CEL	GSM342863.CEL	insulin resistant	post hyperinsulinemic-euglycemic clamp	51 years	F	skeletal muscle	quadriceps	thiazolidinedione (TZD) PPAR-gamma ligand treatment for 3 months	unspecified response to treatment
E-GEOD-13070	04/05/05	GSM342877.CEL	GSM342877.CEL	insulin resistant	post hyperinsulinemic-euglycemic clamp	51 years	M	skeletal muscle	quadriceps	thiazolidinedione (TZD) PPAR-gamma ligand treatment for 3 months	unspecified response to treatment
E-GEOD-13070	09/09/04	GSM342873.CEL	GSM342873.CEL	insulin resistant	post hyperinsulinemic-euglycemic clamp	51 years	M	skeletal muscle	quadriceps	thiazolidinedione (TZD) PPAR-gamma ligand treatment for 3 months	unspecified response to treatment
E-GEOD-13070	08/24/04	GSM342895.CEL	GSM342895.CEL	insulin resistant	post hyperinsulinemic-euglycemic clamp	51 years	M	skeletal muscle	quadriceps	thiazolidinedione (TZD) PPAR-gamma ligand treatment for 3 months	unspecified response to treatment
E-GEOD-13070	10/27/04	GSM342891.CEL	GSM342891.CEL	insulin resistant	post hyperinsulinemic-euglycemic clamp	51 years	F	skeletal muscle	quadriceps	thiazolidinedione (TZD) PPAR-gamma ligand treatment for 3 months	unspecified response to treatment
E-GEOD-13070	08/24/04	GSM342898.CEL	GSM342898.CEL	insulin resistant	post hyperinsulinemic-euglycemic clamp	51 years	M	skeletal muscle	quadriceps	thiazolidinedione (TZD) PPAR-gamma ligand treatment for 3 months	unspecified response to treatment
E-GEOD-13070	08/13/04	GSM342902.CEL	GSM342902.CEL	insulin resistant	post hyperinsulinemic-euglycemic clamp	51 years	M	skeletal muscle	quadriceps	thiazolidinedione (TZD) PPAR-gamma ligand treatment for 3 months	unspecified response to treatment
E-GEOD-13070	08/12/04	GSM342918.CEL	GSM342918.CEL	insulin resistant	post hyperinsulinemic-euglycemic clamp	51 years	M	skeletal muscle	quadriceps	thiazolidinedione (TZD) PPAR-gamma ligand treatment for 3 months	unspecified response to treatment
E-GEOD-13070	08/12/04	GSM342914.CEL	GSM342914.CEL	insulin resistant	post hyperinsulinemic-euglycemic clamp	51 years	M	skeletal muscle	quadriceps	thiazolidinedione (TZD) PPAR-gamma ligand treatment for 3 months	unspecified response to treatment
E-GEOD-13070	10/27/04	GSM342922.CEL	GSM342922.CEL	insulin resistant	post hyperinsulinemic-euglycemic clamp	51 years	M	skeletal muscle	quadriceps	thiazolidinedione (TZD) PPAR-gamma ligand treatment for 3 months	unspecified response to treatment
E-GEOD-13070	09/22/04	GSM342937.CEL	GSM342937.CEL	insulin resistant	post hyperinsulinemic-euglycemic clamp	51 years	M	skeletal muscle	quadriceps	thiazolidinedione (TZD) PPAR-gamma ligand treatment for 3 months	unspecified response to treatment
E-GEOD-13070	08/10/04	GSM342933.CEL	GSM342933.CEL	insulin resistant	post hyperinsulinemic-euglycemic clamp	51 years	M	skeletal muscle	quadriceps	thiazolidinedione (TZD) PPAR-gamma ligand treatment for 3 months	unspecified response to treatment
E-GEOD-13070	08/09/04	GSM342621.CEL	GSM342621.CEL	insulin resistant	post hyperinsulinemic-euglycemic clamp	51 years	M	skeletal muscle	quadriceps
E-GEOD-13070	10/28/04	GSM342627.CEL	GSM342627.CEL	insulin resistant	post hyperinsulinemic-euglycemic clamp	51 years	M	skeletal muscle	quadriceps
E-GEOD-13070	09/09/04	GSM342666.CEL	GSM342666.CEL	insulin resistant	post hyperinsulinemic-euglycemic clamp	51 years	M	skeletal muscle	quadriceps
E-GEOD-13070	08/11/04	GSM342790.CEL	GSM342790.CEL	insulin resistant	post hyperinsulinemic-euglycemic clamp	51 years	M	skeletal muscle	quadriceps
E-GEOD-13070	09/30/04	GSM342832.CEL	GSM342832.CEL	insulin resistant	post hyperinsulinemic-euglycemic clamp	51 years	M	skeletal muscle	quadriceps
E-GEOD-13070	09/09/04	GSM342928.CEL	GSM342928.CEL	insulin resistant	post hyperinsulinemic-euglycemic clamp	51 years	M	skeletal muscle	quadriceps
E-GEOD-13070	02/28/05	GSM342724.CEL	GSM342724.CEL	insulin resistant	post hyperinsulinemic-euglycemic clamp	51 years	M	skeletal muscle	quadriceps
E-GEOD-13070	02/28/05	GSM342730.CEL	GSM342730.CEL	insulin resistant	post hyperinsulinemic-euglycemic clamp	51 years	M	skeletal muscle	quadriceps
E-GEOD-13070	02/28/05	GSM342742.CEL	GSM342742.CEL	insulin resistant	post hyperinsulinemic-euglycemic clamp	51 years	M	skeletal muscle	quadriceps
E-GEOD-13070	10/15/04	GSM342760.CEL	GSM342760.CEL	insulin resistant	post hyperinsulinemic-euglycemic clamp	51 years	M	skeletal muscle	quadriceps
E-GEOD-13070	08/09/04	GSM342766.CEL	GSM342766.CEL	insulin resistant	post hyperinsulinemic-euglycemic clamp	51 years	M	skeletal muscle	quadriceps
E-GEOD-13070	08/09/04	GSM342796.CEL	GSM342796.CEL	insulin resistant	post hyperinsulinemic-euglycemic clamp	51 years	F	skeletal muscle	quadriceps
E-GEOD-13070	08/13/04	GSM342826.CEL	GSM342826.CEL	insulin resistant	post hyperinsulinemic-euglycemic clamp	51 years	F	skeletal muscle	quadriceps
E-GEOD-13070	09/28/04	GSM342837.CEL	GSM342837.CEL	insulin resistant	post hyperinsulinemic-euglycemic clamp	51 years	M	skeletal muscle	quadriceps
E-GEOD-13070	10/20/04	GSM342855.CEL	GSM342855.CEL	insulin resistant	post hyperinsulinemic-euglycemic clamp	51 years	M	skeletal muscle	quadriceps
E-GEOD-13070	04/05/05	GSM342883.CEL	GSM342883.CEL	insulin resistant	post hyperinsulinemic-euglycemic clamp	51 years	M	skeletal muscle	quadriceps
E-GEOD-13070	08/09/04	GSM342609.CEL	GSM342609.CEL	insulin resistant	post hyperinsulinemic-euglycemic clamp	51 years	M	skeletal muscle	quadriceps
E-GEOD-13070	08/09/04	GSM342615.CEL	GSM342615.CEL	insulin resistant	post hyperinsulinemic-euglycemic clamp	51 years	M	skeletal muscle	quadriceps
E-GEOD-13070	12/07/04	GSM342633.CEL	GSM342633.CEL	insulin resistant	post hyperinsulinemic-euglycemic clamp	51 years	M	skeletal muscle	quadriceps
E-GEOD-13070	08/10/04	GSM342643.CEL	GSM342643.CEL	insulin resistant	post hyperinsulinemic-euglycemic clamp	51 years	M	skeletal muscle	quadriceps
E-GEOD-13070	08/10/04	GSM342649.CEL	GSM342649.CEL	insulin resistant	post hyperinsulinemic-euglycemic clamp	51 years	M	skeletal muscle	quadriceps
E-GEOD-13070	08/11/04	GSM342654.CEL	GSM342654.CEL	insulin resistant	post hyperinsulinemic-euglycemic clamp	51 years	M	skeletal muscle	quadriceps
E-GEOD-13070	08/13/04	GSM342660.CEL	GSM342660.CEL	insulin resistant	post hyperinsulinemic-euglycemic clamp	51 years	M	skeletal muscle	quadriceps
E-GEOD-13070	09/09/04	GSM342672.CEL	GSM342672.CEL	insulin resistant	post hyperinsulinemic-euglycemic clamp	51 years	M	skeletal muscle	quadriceps
E-GEOD-13070	05/10/05	GSM342748.CEL	GSM342748.CEL	insulin resistant	post hyperinsulinemic-euglycemic clamp	51 years	M	skeletal muscle	quadriceps
E-GEOD-13070	08/09/04	GSM342772.CEL	GSM342772.CEL	insulin resistant	post hyperinsulinemic-euglycemic clamp	51 years	M	skeletal muscle	quadriceps
E-GEOD-13070	08/11/04	GSM342778.CEL	GSM342778.CEL	insulin resistant	post hyperinsulinemic-euglycemic clamp	51 years	M	skeletal muscle	quadriceps
E-GEOD-13070	08/09/04	GSM342784.CEL	GSM342784.CEL	insulin resistant	post hyperinsulinemic-euglycemic clamp	51 years	M	skeletal muscle	quadriceps
E-GEOD-13070	08/11/04	GSM342802.CEL	GSM342802.CEL	insulin resistant	post hyperinsulinemic-euglycemic clamp	51 years	F	skeletal muscle	quadriceps
E-GEOD-13070	10/15/04	GSM342820.CEL	GSM342820.CEL	insulin resistant	post hyperinsulinemic-euglycemic clamp	51 years	M	skeletal muscle	quadriceps
E-GEOD-13070	09/09/04	GSM342843.CEL	GSM342843.CEL	insulin resistant	post hyperinsulinemic-euglycemic clamp	51 years	M	skeletal muscle	quadriceps
E-GEOD-13070	08/12/04	GSM342849.CEL	GSM342849.CEL	insulin resistant	post hyperinsulinemic-euglycemic clamp	51 years	M	skeletal muscle	quadriceps
E-GEOD-13070	12/08/04	GSM342861.CEL	GSM342861.CEL	insulin resistant	post hyperinsulinemic-euglycemic clamp	51 years	F	skeletal muscle	quadriceps
E-GEOD-13070	08/10/04	GSM342871.CEL	GSM342871.CEL	insulin resistant	post hyperinsulinemic-euglycemic clamp	51 years	M	skeletal muscle	quadriceps
E-GEOD-13070	08/10/04	GSM342875.CEL	GSM342875.CEL	insulin resistant	post hyperinsulinemic-euglycemic clamp	51 years	M	skeletal muscle	quadriceps
E-GEOD-13070	08/10/04	GSM342889.CEL	GSM342889.CEL	insulin resistant	post hyperinsulinemic-euglycemic clamp	51 years	F	skeletal muscle	quadriceps
E-GEOD-13070	10/27/04	GSM342893.CEL	GSM342893.CEL	insulin resistant	post hyperinsulinemic-euglycemic clamp	51 years	M	skeletal muscle	quadriceps
E-GEOD-13070	08/10/04	GSM342896.CEL	GSM342896.CEL	insulin resistant	post hyperinsulinemic-euglycemic clamp	51 years	M	skeletal muscle	quadriceps
E-GEOD-13070	08/10/04	GSM342912.CEL	GSM342912.CEL	insulin resistant	post hyperinsulinemic-euglycemic clamp	51 years	M	skeletal muscle	quadriceps
E-GEOD-13070	12/07/04	GSM342916.CEL	GSM342916.CEL	insulin resistant	post hyperinsulinemic-euglycemic clamp	51 years	M	skeletal muscle	quadriceps
E-GEOD-13070	08/13/04	GSM342935.CEL	GSM342935.CEL	insulin resistant	post hyperinsulinemic-euglycemic clamp	51 years	M	skeletal muscle	quadriceps
E-GEOD-13070	10/28/04	GSM342932.CEL	GSM342932.CEL	insulin resistant	post hyperinsulinemic-euglycemic clamp	51 years	M	skeletal muscle	quadriceps
E-GEOD-13070	04/06/05	GSM342622.CEL	GSM342622.CEL	insulin resistant	thiazolidinedione (TZD) PPAR-gamma ligand treatment for 3 months	51 years	M	skeletal muscle	quadriceps
E-GEOD-13070	09/22/04	GSM342628.CEL	GSM342628.CEL	insulin resistant	thiazolidinedione (TZD) PPAR-gamma ligand treatment for 3 months	51 years	M	skeletal muscle	quadriceps
E-GEOD-13070	10/21/04	GSM342639.CEL	GSM342639.CEL	insulin resistant	thiazolidinedione (TZD) PPAR-gamma ligand treatment for 3 months	51 years	F	skeletal muscle	quadriceps
E-GEOD-13070	09/30/04	GSM342667.CEL	GSM342667.CEL	insulin resistant	thiazolidinedione (TZD) PPAR-gamma ligand treatment for 3 months	51 years	M	skeletal muscle	quadriceps
E-GEOD-13070	08/25/04	GSM342679.CEL	GSM342679.CEL	insulin resistant	thiazolidinedione (TZD) PPAR-gamma ligand treatment for 3 months	51 years	F	skeletal muscle	quadriceps
E-GEOD-13070	08/11/04	GSM342755.CEL	GSM342755.CEL	insulin resistant	thiazolidinedione (TZD) PPAR-gamma ligand treatment for 3 months	51 years	M	skeletal muscle	quadriceps
E-GEOD-13070	04/05/05	GSM342791.CEL	GSM342791.CEL	insulin resistant	thiazolidinedione (TZD) PPAR-gamma ligand treatment for 3 months	51 years	M	skeletal muscle	quadriceps
E-GEOD-13070	08/24/04	GSM342815.CEL	GSM342815.CEL	insulin resistant	thiazolidinedione (TZD) PPAR-gamma ligand treatment for 3 months	51 years	M	skeletal muscle	quadriceps
E-GEOD-13070	08/25/04	GSM342833.CEL	GSM342833.CEL	insulin resistant	thiazolidinedione (TZD) PPAR-gamma ligand treatment for 3 months	51 years	M	skeletal muscle	quadriceps
E-GEOD-13070	08/10/04	GSM342868.CEL	GSM342868.CEL	insulin resistant	thiazolidinedione (TZD) PPAR-gamma ligand treatment for 3 months	51 years	M	skeletal muscle	quadriceps
E-GEOD-13070	08/13/04	GSM342886.CEL	GSM342886.CEL	insulin resistant	thiazolidinedione (TZD) PPAR-gamma ligand treatment for 3 months	51 years	M	skeletal muscle	quadriceps
E-GEOD-13070	08/12/04	GSM342909.CEL	GSM342909.CEL	insulin resistant	thiazolidinedione (TZD) PPAR-gamma ligand treatment for 3 months	51 years	M	skeletal muscle	quadriceps
E-GEOD-13070	08/24/04	GSM342929.CEL	GSM342929.CEL	insulin resistant	thiazolidinedione (TZD) PPAR-gamma ligand treatment for 3 months	51 years	M	skeletal muscle	quadriceps
E-GEOD-13070	05/11/05	GSM342725.CEL	GSM342725.CEL	insulin resistant	thiazolidinedione (TZD) PPAR-gamma ligand treatment for 3 months	51 years	M	skeletal muscle	quadriceps
E-GEOD-13070	07/07/05	GSM342731.CEL	GSM342731.CEL	insulin resistant	thiazolidinedione (TZD) PPAR-gamma ligand treatment for 3 months	51 years	M	skeletal muscle	quadriceps
E-GEOD-13070	07/07/05	GSM342743.CEL	GSM342743.CEL	insulin resistant	thiazolidinedione (TZD) PPAR-gamma ligand treatment for 3 months	51 years	M	skeletal muscle	quadriceps
E-GEOD-13070	08/12/04	GSM342761.CEL	GSM342761.CEL	insulin resistant	thiazolidinedione (TZD) PPAR-gamma ligand treatment for 3 months	51 years	M	skeletal muscle	quadriceps
E-GEOD-13070	08/09/04	GSM342767.CEL	GSM342767.CEL	insulin resistant	thiazolidinedione (TZD) PPAR-gamma ligand treatment for 3 months	51 years	M	skeletal muscle	quadriceps
E-GEOD-13070	04/05/05	GSM342797.CEL	GSM342797.CEL	insulin resistant	thiazolidinedione (TZD) PPAR-gamma ligand treatment for 3 months	51 years	F	skeletal muscle	quadriceps
E-GEOD-13070	04/06/05	GSM342809.CEL	GSM342809.CEL	insulin resistant	thiazolidinedione (TZD) PPAR-gamma ligand treatment for 3 months	51 years	F	skeletal muscle	quadriceps
E-GEOD-13070	09/22/04	GSM342827.CEL	GSM342827.CEL	insulin resistant	thiazolidinedione (TZD) PPAR-gamma ligand treatment for 3 months	51 years	F	skeletal muscle	quadriceps
E-GEOD-13070	09/30/04	GSM342838.CEL	GSM342838.CEL	insulin resistant	thiazolidinedione (TZD) PPAR-gamma ligand treatment for 3 months	51 years	M	skeletal muscle	quadriceps
E-GEOD-13070	10/20/04	GSM342856.CEL	GSM342856.CEL	insulin resistant	thiazolidinedione (TZD) PPAR-gamma ligand treatment for 3 months	51 years	M	skeletal muscle	quadriceps
E-GEOD-13070	04/05/05	GSM342880.CEL	GSM342880.CEL	insulin resistant	thiazolidinedione (TZD) PPAR-gamma ligand treatment for 3 months	51 years	M	skeletal muscle	quadriceps
E-GEOD-13070	08/12/04	GSM342610.CEL	GSM342610.CEL	insulin resistant	thiazolidinedione (TZD) PPAR-gamma ligand treatment for 3 months	51 years	M	skeletal muscle	quadriceps
E-GEOD-13070	08/11/04	GSM342616.CEL	GSM342616.CEL	insulin resistant	thiazolidinedione (TZD) PPAR-gamma ligand treatment for 3 months	51 years	M	skeletal muscle	quadriceps
E-GEOD-13070	08/24/04	GSM342634.CEL	GSM342634.CEL	insulin resistant	thiazolidinedione (TZD) PPAR-gamma ligand treatment for 3 months	51 years	M	skeletal muscle	quadriceps
E-GEOD-13070	08/13/04	GSM342644.CEL	GSM342644.CEL	insulin resistant	thiazolidinedione (TZD) PPAR-gamma ligand treatment for 3 months	51 years	M	skeletal muscle	quadriceps
E-GEOD-13070	09/28/04	GSM342655.CEL	GSM342655.CEL	insulin resistant	thiazolidinedione (TZD) PPAR-gamma ligand treatment for 3 months	51 years	M	skeletal muscle	quadriceps
E-GEOD-13070	08/10/04	GSM342650.CEL	GSM342650.CEL	insulin resistant	thiazolidinedione (TZD) PPAR-gamma ligand treatment for 3 months	51 years	M	skeletal muscle	quadriceps
E-GEOD-13070	09/28/04	GSM342661.CEL	GSM342661.CEL	insulin resistant	thiazolidinedione (TZD) PPAR-gamma ligand treatment for 3 months	51 years	M	skeletal muscle	quadriceps
E-GEOD-13070	08/09/04	GSM342773.CEL	GSM342773.CEL	insulin resistant	thiazolidinedione (TZD) PPAR-gamma ligand treatment for 3 months	51 years	M	skeletal muscle	quadriceps
E-GEOD-13070	08/12/04	GSM342779.CEL	GSM342779.CEL	insulin resistant	thiazolidinedione (TZD) PPAR-gamma ligand treatment for 3 months	51 years	M	skeletal muscle	quadriceps
E-GEOD-13070	04/05/05	GSM342785.CEL	GSM342785.CEL	insulin resistant	thiazolidinedione (TZD) PPAR-gamma ligand treatment for 3 months	51 years	M	skeletal muscle	quadriceps
E-GEOD-13070	04/06/05	GSM342803.CEL	GSM342803.CEL	insulin resistant	thiazolidinedione (TZD) PPAR-gamma ligand treatment for 3 months	51 years	F	skeletal muscle	quadriceps
E-GEOD-13070	04/07/05	GSM342844.CEL	GSM342844.CEL	insulin resistant	thiazolidinedione (TZD) PPAR-gamma ligand treatment for 3 months	51 years	M	skeletal muscle	quadriceps
E-GEOD-13070	12/08/04	GSM342862.CEL	GSM342862.CEL	insulin resistant	thiazolidinedione (TZD) PPAR-gamma ligand treatment for 3 months	51 years	F	skeletal muscle	quadriceps
E-GEOD-13070	04/05/05	GSM342876.CEL	GSM342876.CEL	insulin resistant	thiazolidinedione (TZD) PPAR-gamma ligand treatment for 3 months	51 years	M	skeletal muscle	quadriceps
E-GEOD-13070	08/12/04	GSM342872.CEL	GSM342872.CEL	insulin resistant	thiazolidinedione (TZD) PPAR-gamma ligand treatment for 3 months	51 years	M	skeletal muscle	quadriceps
E-GEOD-13070	08/24/04	GSM342890.CEL	GSM342890.CEL	insulin resistant	thiazolidinedione (TZD) PPAR-gamma ligand treatment for 3 months	51 years	F	skeletal muscle	quadriceps
E-GEOD-13070	08/13/04	GSM342901.CEL	GSM342901.CEL	insulin resistant	thiazolidinedione (TZD) PPAR-gamma ligand treatment for 3 months	51 years	M	skeletal muscle	quadriceps
E-GEOD-13070	04/05/05	GSM342897.CEL	GSM342897.CEL	insulin resistant	thiazolidinedione (TZD) PPAR-gamma ligand treatment for 3 months	51 years	M	skeletal muscle	quadriceps
E-GEOD-13070	08/12/04	GSM342913.CEL	GSM342913.CEL	insulin resistant	thiazolidinedione (TZD) PPAR-gamma ligand treatment for 3 months	51 years	M	skeletal muscle	quadriceps
E-GEOD-13070	08/12/04	GSM342917.CEL	GSM342917.CEL	insulin resistant	thiazolidinedione (TZD) PPAR-gamma ligand treatment for 3 months	51 years	M	skeletal muscle	quadriceps
E-GEOD-13070	10/27/04	GSM342921.CEL	GSM342921.CEL	insulin resistant	thiazolidinedione (TZD) PPAR-gamma ligand treatment for 3 months	51 years	M	skeletal muscle	quadriceps
E-GEOD-13070	12/07/04	GSM342936.CEL	GSM342936.CEL	insulin resistant	thiazolidinedione (TZD) PPAR-gamma ligand treatment for 3 months	51 years	M	skeletal muscle	quadriceps
E-GEOD-13070	08/11/04	GSM342620.CEL	GSM342620.CEL	insulin resistant		51 years	M	skeletal muscle	quadriceps
E-GEOD-13070	09/09/04	GSM342626.CEL	GSM342626.CEL	insulin resistant		51 years	M	skeletal muscle	quadriceps
E-GEOD-13070	08/09/04	GSM342638.CEL	GSM342638.CEL	insulin resistant		51 years	F	skeletal muscle	quadriceps
E-GEOD-13070	09/09/04	GSM342665.CEL	GSM342665.CEL	insulin resistant		51 years	M	skeletal muscle	quadriceps
E-GEOD-13070	08/09/04	GSM342789.CEL	GSM342789.CEL	insulin resistant		51 years	M	skeletal muscle	quadriceps
E-GEOD-13070	08/13/04	GSM342813.CEL	GSM342813.CEL	insulin resistant		51 years	M	skeletal muscle	quadriceps
E-GEOD-13070	08/11/04	GSM342831.CEL	GSM342831.CEL	insulin resistant		51 years	M	skeletal muscle	quadriceps
E-GEOD-13070	08/13/04	GSM342927.CEL	GSM342927.CEL	insulin resistant		51 years	M	skeletal muscle	quadriceps
E-GEOD-13070	02/28/05	GSM342723.CEL	GSM342723.CEL	insulin resistant		51 years	M	skeletal muscle	quadriceps
E-GEOD-13070	02/28/05	GSM342729.CEL	GSM342729.CEL	insulin resistant		51 years	M	skeletal muscle	quadriceps
E-GEOD-13070	02/28/05	GSM342741.CEL	GSM342741.CEL	insulin resistant		51 years	M	skeletal muscle	quadriceps
E-GEOD-13070	08/09/04	GSM342765.CEL	GSM342765.CEL	insulin resistant		51 years	M	skeletal muscle	quadriceps
E-GEOD-13070	08/11/04	GSM342795.CEL	GSM342795.CEL	insulin resistant		51 years	F	skeletal muscle	quadriceps
E-GEOD-13070	09/22/04	GSM342807.CEL	GSM342807.CEL	insulin resistant		51 years	F	skeletal muscle	quadriceps
E-GEOD-13070	09/09/04	GSM342825.CEL	GSM342825.CEL	insulin resistant		51 years	F	skeletal muscle	quadriceps
E-GEOD-13070	10/15/04	GSM342854.CEL	GSM342854.CEL	insulin resistant		51 years	M	skeletal muscle	quadriceps
E-GEOD-13070	10/27/04	GSM342882.CEL	GSM342882.CEL	insulin resistant		51 years	M	skeletal muscle	quadriceps
E-GEOD-13070	08/10/04	GSM342878.CEL	GSM342878.CEL	insulin resistant		51 years	M	skeletal muscle	quadriceps
E-GEOD-13070	08/11/04	GSM342608.CEL	GSM342608.CEL	insulin resistant		51 years	M	skeletal muscle	quadriceps
E-GEOD-13070	08/09/04	GSM342614.CEL	GSM342614.CEL	insulin resistant		51 years	M	skeletal muscle	quadriceps
E-GEOD-13070	05/10/05	GSM342632.CEL	GSM342632.CEL	insulin resistant		51 years	M	skeletal muscle	quadriceps
E-GEOD-13070	08/10/04	GSM342642.CEL	GSM342642.CEL	insulin resistant		51 years	M	skeletal muscle	quadriceps
E-GEOD-13070	08/10/04	GSM342648.CEL	GSM342648.CEL	insulin resistant		51 years	M	skeletal muscle	quadriceps
E-GEOD-13070	10/21/04	GSM342653.CEL	GSM342653.CEL	insulin resistant		51 years	M	skeletal muscle	quadriceps
E-GEOD-13070	08/11/04	GSM342659.CEL	GSM342659.CEL	insulin resistant		51 years	M	skeletal muscle	quadriceps
E-GEOD-13070	04/07/05	GSM342671.CEL	GSM342671.CEL	insulin resistant		51 years	M	skeletal muscle	quadriceps
E-GEOD-13070	05/10/05	GSM342747.CEL	GSM342747.CEL	insulin resistant		51 years	M	skeletal muscle	quadriceps
E-GEOD-13070	08/09/04	GSM342771.CEL	GSM342771.CEL	insulin resistant		51 years	M	skeletal muscle	quadriceps
E-GEOD-13070	08/09/04	GSM342777.CEL	GSM342777.CEL	insulin resistant		51 years	M	skeletal muscle	quadriceps
E-GEOD-13070	08/11/04	GSM342783.CEL	GSM342783.CEL	insulin resistant		51 years	M	skeletal muscle	quadriceps
E-GEOD-13070	08/09/04	GSM342801.CEL	GSM342801.CEL	insulin resistant		51 years	F	skeletal muscle	quadriceps
E-GEOD-13070	09/22/04	GSM342819.CEL	GSM342819.CEL	insulin resistant		51 years	M	skeletal muscle	quadriceps
E-GEOD-13070	09/28/04	GSM342842.CEL	GSM342842.CEL	insulin resistant		51 years	M	skeletal muscle	quadriceps
E-GEOD-13070	10/15/04	GSM342848.CEL	GSM342848.CEL	insulin resistant		51 years	M	skeletal muscle	quadriceps
E-GEOD-13070	08/13/04	GSM342892.CEL	GSM342892.CEL	insulin resistant		51 years	M	skeletal muscle	quadriceps
E-GEOD-13070	08/13/04	GSM342899.CEL	GSM342899.CEL	insulin resistant		51 years	M	skeletal muscle	quadriceps
E-GEOD-13070	08/10/04	GSM342919.CEL	GSM342919.CEL	insulin resistant		51 years	M	skeletal muscle	quadriceps
E-GEOD-13070	08/12/04	GSM342934.CEL	GSM342934.CEL	insulin resistant		51 years	M	skeletal muscle	quadriceps
E-GEOD-13070	09/22/04	GSM342686.CEL	GSM342686.CEL	post hyperinsulinemic-euglycemic clamp	thiazolidinedione (TZD) PPAR-gamma ligand treatment for 3 months	45 years	M	skeletal muscle	quadriceps
E-GEOD-13070	04/07/05	GSM342692.CEL	GSM342692.CEL	post hyperinsulinemic-euglycemic clamp	thiazolidinedione (TZD) PPAR-gamma ligand treatment for 3 months	45 years	F	skeletal muscle	quadriceps
E-GEOD-13070	04/13/05	GSM342698.CEL	GSM342698.CEL	post hyperinsulinemic-euglycemic clamp	thiazolidinedione (TZD) PPAR-gamma ligand treatment for 3 months	45 years	M	skeletal muscle	quadriceps
E-GEOD-13070	10/28/04	GSM342704.CEL	GSM342704.CEL	post hyperinsulinemic-euglycemic clamp	thiazolidinedione (TZD) PPAR-gamma ligand treatment for 3 months	45 years	M	skeletal muscle	quadriceps
E-GEOD-13070	10/28/04	GSM342715.CEL	GSM342715.CEL	post hyperinsulinemic-euglycemic clamp	thiazolidinedione (TZD) PPAR-gamma ligand treatment for 3 months	45 years	M	skeletal muscle	quadriceps
E-GEOD-13070	12/07/04	GSM342720.CEL	GSM342720.CEL	post hyperinsulinemic-euglycemic clamp	thiazolidinedione (TZD) PPAR-gamma ligand treatment for 3 months	45 years	M	skeletal muscle	quadriceps
E-GEOD-13070	05/11/05	GSM342738.CEL	GSM342738.CEL	post hyperinsulinemic-euglycemic clamp	thiazolidinedione (TZD) PPAR-gamma ligand treatment for 3 months	45 years	M	skeletal muscle	quadriceps
E-GEOD-13070	10/15/04	GSM342906.CEL	GSM342906.CEL	post hyperinsulinemic-euglycemic clamp	thiazolidinedione (TZD) PPAR-gamma ligand treatment for 3 months	45 years	F	skeletal muscle	quadriceps
E-GEOD-13070	08/13/04	GSM342926.CEL	GSM342926.CEL	post hyperinsulinemic-euglycemic clamp	thiazolidinedione (TZD) PPAR-gamma ligand treatment for 3 months	45 years	M	skeletal muscle	quadriceps
E-GEOD-13070	08/12/04	GSM342940.CEL	GSM342940.CEL	post hyperinsulinemic-euglycemic clamp	thiazolidinedione (TZD) PPAR-gamma ligand treatment for 3 months	45 years	M	skeletal muscle	quadriceps
E-GEOD-13070	04/05/05	GSM342948.CEL	GSM342948.CEL	post hyperinsulinemic-euglycemic clamp	thiazolidinedione (TZD) PPAR-gamma ligand treatment for 3 months	45 years	M	skeletal muscle	quadriceps
E-GEOD-13070	08/12/04	GSM342944.CEL	GSM342944.CEL	post hyperinsulinemic-euglycemic clamp	thiazolidinedione (TZD) PPAR-gamma ligand treatment for 3 months	45 years	M	skeletal muscle	quadriceps
E-GEOD-13070	10/28/04	GSM342955.CEL	GSM342955.CEL	post hyperinsulinemic-euglycemic clamp	thiazolidinedione (TZD) PPAR-gamma ligand treatment for 3 months	45 years	M	skeletal muscle	quadriceps
E-GEOD-13070	08/10/04	GSM342951.CEL	GSM342951.CEL	post hyperinsulinemic-euglycemic clamp	thiazolidinedione (TZD) PPAR-gamma ligand treatment for 3 months	45 years	F	skeletal muscle	quadriceps
E-GEOD-13070	10/15/04	GSM342967.CEL	GSM342967.CEL	post hyperinsulinemic-euglycemic clamp	thiazolidinedione (TZD) PPAR-gamma ligand treatment for 3 months	45 years	M	skeletal muscle	quadriceps
E-GEOD-13070	10/28/04	GSM342963.CEL	GSM342963.CEL	post hyperinsulinemic-euglycemic clamp	thiazolidinedione (TZD) PPAR-gamma ligand treatment for 3 months	45 years	M	skeletal muscle	quadriceps
E-GEOD-13070	10/15/04	GSM342971.CEL	GSM342971.CEL	post hyperinsulinemic-euglycemic clamp	thiazolidinedione (TZD) PPAR-gamma ligand treatment for 3 months	45 years	M	skeletal muscle	quadriceps
E-GEOD-13070	08/11/04	GSM342684.CEL	GSM342684.CEL	post hyperinsulinemic-euglycemic clamp		45 years	M	skeletal muscle	quadriceps
E-GEOD-13070	08/10/04	GSM342690.CEL	GSM342690.CEL	post hyperinsulinemic-euglycemic clamp		45 years	F	skeletal muscle	quadriceps
E-GEOD-13070	08/25/04	GSM342696.CEL	GSM342696.CEL	post hyperinsulinemic-euglycemic clamp		45 years	M	skeletal muscle	quadriceps
E-GEOD-13070	10/21/04	GSM342702.CEL	GSM342702.CEL	post hyperinsulinemic-euglycemic clamp		45 years	M	skeletal muscle	quadriceps
E-GEOD-13070	09/28/04	GSM342707.CEL	GSM342707.CEL	post hyperinsulinemic-euglycemic clamp		45 years	M	skeletal muscle	quadriceps
E-GEOD-13070	10/28/04	GSM342713.CEL	GSM342713.CEL	post hyperinsulinemic-euglycemic clamp		45 years	M	skeletal muscle	quadriceps
E-GEOD-13070	12/07/04	GSM342718.CEL	GSM342718.CEL	post hyperinsulinemic-euglycemic clamp		45 years	M	skeletal muscle	quadriceps
E-GEOD-13070	02/28/05	GSM342736.CEL	GSM342736.CEL	post hyperinsulinemic-euglycemic clamp		45 years	M	skeletal muscle	quadriceps
E-GEOD-13070	04/05/05	GSM342924.CEL	GSM342924.CEL	post hyperinsulinemic-euglycemic clamp		45 years	M	skeletal muscle	quadriceps
E-GEOD-13070	04/05/05	GSM342946.CEL	GSM342946.CEL	post hyperinsulinemic-euglycemic clamp		45 years	M	skeletal muscle	quadriceps
E-GEOD-13070	08/12/04	GSM342953.CEL	GSM342953.CEL	post hyperinsulinemic-euglycemic clamp		45 years	M	skeletal muscle	quadriceps
E-GEOD-13070	10/15/04	GSM342950.CEL	GSM342950.CEL	post hyperinsulinemic-euglycemic clamp		45 years	F	skeletal muscle	quadriceps
E-GEOD-13070	08/24/04	GSM342961.CEL	GSM342961.CEL	post hyperinsulinemic-euglycemic clamp		45 years	M	skeletal muscle	quadriceps
E-GEOD-13070	08/24/04	GSM342957.CEL	GSM342957.CEL	post hyperinsulinemic-euglycemic clamp		45 years	M	skeletal muscle	quadriceps
E-GEOD-13070	08/24/04	GSM342965.CEL	GSM342965.CEL	post hyperinsulinemic-euglycemic clamp		45 years	M	skeletal muscle	quadriceps
E-GEOD-13070	08/12/04	GSM342969.CEL	GSM342969.CEL	post hyperinsulinemic-euglycemic clamp		45 years	M	skeletal muscle	quadriceps
E-GEOD-13070	09/22/04	GSM342685.CEL	GSM342685.CEL	thiazolidinedione (TZD) PPAR-gamma ligand treatment for 3 months		45 years	M	skeletal muscle	quadriceps
E-GEOD-13070	04/07/05	GSM342691.CEL	GSM342691.CEL	thiazolidinedione (TZD) PPAR-gamma ligand treatment for 3 months		45 years	M	skeletal muscle	quadriceps
E-GEOD-13070	10/21/04	GSM342703.CEL	GSM342703.CEL	thiazolidinedione (TZD) PPAR-gamma ligand treatment for 3 months		45 years	M	skeletal muscle	quadriceps
E-GEOD-13070	10/28/04	GSM342714.CEL	GSM342714.CEL	thiazolidinedione (TZD) PPAR-gamma ligand treatment for 3 months		45 years	M	skeletal muscle	quadriceps
E-GEOD-13070	12/07/04	GSM342719.CEL	GSM342719.CEL	thiazolidinedione (TZD) PPAR-gamma ligand treatment for 3 months		45 years	M	skeletal muscle	quadriceps
E-GEOD-13070	05/11/05	GSM342737.CEL	GSM342737.CEL	thiazolidinedione (TZD) PPAR-gamma ligand treatment for 3 months		45 years	M	skeletal muscle	quadriceps
E-GEOD-13070	10/27/04	GSM342905.CEL	GSM342905.CEL	thiazolidinedione (TZD) PPAR-gamma ligand treatment for 3 months		45 years	F	skeletal muscle	quadriceps
E-GEOD-13070	10/28/04	GSM342925.CEL	GSM342925.CEL	thiazolidinedione (TZD) PPAR-gamma ligand treatment for 3 months		45 years	M	skeletal muscle	quadriceps
E-GEOD-13070	08/12/04	GSM342943.CEL	GSM342943.CEL	thiazolidinedione (TZD) PPAR-gamma ligand treatment for 3 months		45 years	M	skeletal muscle	quadriceps
E-GEOD-13070	09/09/04	GSM342939.CEL	GSM342939.CEL	thiazolidinedione (TZD) PPAR-gamma ligand treatment for 3 months		45 years	M	skeletal muscle	quadriceps
E-GEOD-13070	08/12/04	GSM342947.CEL	GSM342947.CEL	thiazolidinedione (TZD) PPAR-gamma ligand treatment for 3 months		45 years	M	skeletal muscle	quadriceps
E-GEOD-13070	08/24/04	GSM342954.CEL	GSM342954.CEL	thiazolidinedione (TZD) PPAR-gamma ligand treatment for 3 months		45 years	M	skeletal muscle	quadriceps
E-GEOD-13070	09/30/04	GSM342958.CEL	GSM342958.CEL	thiazolidinedione (TZD) PPAR-gamma ligand treatment for 3 months		45 years	M	skeletal muscle	quadriceps
E-GEOD-13070	10/15/04	GSM342966.CEL	GSM342966.CEL	thiazolidinedione (TZD) PPAR-gamma ligand treatment for 3 months		45 years	M	skeletal muscle	quadriceps
E-GEOD-13070	10/28/04	GSM342962.CEL	GSM342962.CEL	thiazolidinedione (TZD) PPAR-gamma ligand treatment for 3 months		45 years	M	skeletal muscle	quadriceps
E-GEOD-13070	10/15/04	GSM342970.CEL	GSM342970.CEL	thiazolidinedione (TZD) PPAR-gamma ligand treatment for 3 months		45 years	M	skeletal muscle	quadriceps
E-GEOD-13070	08/10/04	GSM342683.CEL	GSM342683.CEL	normal		45 years	M	skeletal muscle	quadriceps
E-GEOD-13070	08/11/04	GSM342689.CEL	GSM342689.CEL	normal		45 years	F	skeletal muscle	quadriceps
E-GEOD-13070	09/09/04	GSM342695.CEL	GSM342695.CEL	normal		45 years	M	skeletal muscle	quadriceps
E-GEOD-13070	10/21/04	GSM342701.CEL	GSM342701.CEL	normal		45 years	M	skeletal muscle	quadriceps
E-GEOD-13070	10/21/04	GSM342706.CEL	GSM342706.CEL	normal		45 years	M	skeletal muscle	quadriceps
E-GEOD-13070	10/28/04	GSM342712.CEL	GSM342712.CEL	normal		45 years	M	skeletal muscle	quadriceps
E-GEOD-13070	12/07/04	GSM342717.CEL	GSM342717.CEL	normal		45 years	M	skeletal muscle	quadriceps
E-GEOD-13070	02/28/05	GSM342735.CEL	GSM342735.CEL	normal		45 years	M	skeletal muscle	quadriceps
E-GEOD-13070	10/27/04	GSM342923.CEL	GSM342923.CEL	normal		45 years	M	skeletal muscle	quadriceps
E-GEOD-13070	08/10/04	GSM342941.CEL	GSM342941.CEL	normal		45 years	M	skeletal muscle	quadriceps
E-GEOD-13070	04/05/05	GSM342949.CEL	GSM342949.CEL	normal		45 years	F	skeletal muscle	quadriceps
E-GEOD-13070	08/10/04	GSM342945.CEL	GSM342945.CEL	normal		45 years	M	skeletal muscle	quadriceps
E-GEOD-13070	10/28/04	GSM342952.CEL	GSM342952.CEL	normal		45 years	M	skeletal muscle	quadriceps
E-GEOD-13070	08/12/04	GSM342960.CEL	GSM342960.CEL	normal		45 years	M	skeletal muscle	quadriceps
E-GEOD-13070	08/12/04	GSM342956.CEL	GSM342956.CEL	normal		45 years	M	skeletal muscle	quadriceps
E-GEOD-13070	08/10/04	GSM342964.CEL	GSM342964.CEL	normal		45 years	M	skeletal muscle	quadriceps
E-GEOD-13070	09/22/04	GSM342968.CEL	GSM342968.CEL	normal		45 years	M	skeletal muscle	quadriceps
E-GEOD-13205	12/21/05	GSM333448.CEL	GSM333448.CEL	septic		25 years	F	skeletal muscle	quadriceps
E-GEOD-13205	12/21/05	GSM333439.CEL	GSM333439.CEL	septic		56 years	F	skeletal muscle	quadriceps
E-GEOD-13205	12/21/05	GSM333444.CEL	GSM333444.CEL	septic		67 years	F	skeletal muscle	quadriceps
E-GEOD-13205	12/21/05	GSM333441.CEL	GSM333441.CEL	septic		69 years	F	skeletal muscle	quadriceps
E-GEOD-13205	12/21/05	GSM333447.CEL	GSM333447.CEL	septic		71 years	F	skeletal muscle	quadriceps
E-GEOD-13205	12/21/05	GSM333452.CEL	GSM333452.CEL	normal		72 years	F	skeletal muscle	quadriceps
E-GEOD-13205	12/13/05	GSM333437.CEL	GSM333437.CEL	septic		46 years	M	skeletal muscle	quadriceps
E-GEOD-13205	12/21/05	GSM333446.CEL	GSM333446.CEL	septic		48 years	M	skeletal muscle	quadriceps
E-GEOD-13205	12/21/05	GSM333453.CEL	GSM333453.CEL	normal		60 years	M	skeletal muscle	quadriceps
E-GEOD-13205	12/13/05	GSM333436.CEL	GSM333436.CEL	septic		60 years	F	skeletal muscle	quadriceps
E-GEOD-13205	12/13/05	GSM333449.CEL	GSM333449.CEL	normal		70 years	M	skeletal muscle	quadriceps
E-GEOD-13205	12/21/05	GSM333456.CEL	GSM333456.CEL	normal		70 years	M	skeletal muscle	quadriceps
E-GEOD-13205	12/21/05	GSM333455.CEL	GSM333455.CEL	normal		71 years	M	skeletal muscle	quadriceps
E-GEOD-13205	12/21/05	GSM333443.CEL	GSM333443.CEL	septic		74 years	M	skeletal muscle	quadriceps
E-GEOD-13205	12/21/05	GSM333451.CEL	GSM333451.CEL	normal		76 years	M	skeletal muscle	quadriceps
E-GEOD-13205	12/21/05	GSM333454.CEL	GSM333454.CEL	normal		76 years	M	skeletal muscle	quadriceps
E-GEOD-13205	12/13/05	GSM333450.CEL	GSM333450.CEL	normal		76 years	M	skeletal muscle	quadriceps
E-GEOD-13205	12/21/05	GSM333438.CEL	GSM333438.CEL	septic		77 years	M	skeletal muscle	quadriceps
E-GEOD-13205	12/21/05	GSM333442.CEL	GSM333442.CEL	septic		77 years	M	skeletal muscle	quadriceps
E-GEOD-13205	12/21/05	GSM333445.CEL	GSM333445.CEL	septic		77 years	M	skeletal muscle	quadriceps
E-GEOD-14955	10/27/06	GSM373441.CEL	GSM373441.CEL	acyanotic Tetralogy of Fallot congenital heart disease		10 years	M	heart	right ventricle
E-GEOD-14955	10/27/06	GSM373444.CEL	GSM373444.CEL	acyanotic Tetralogy of Fallot congenital heart disease		10 years	M	heart	right ventricle
E-GEOD-14955	10/27/06	GSM373442.CEL	GSM373442.CEL	acyanotic Tetralogy of Fallot congenital heart disease		10 years	M	heart	right ventricle
E-GEOD-14955	10/27/06	GSM373443.CEL	GSM373443.CEL	acyanotic Tetralogy of Fallot congenital heart disease		10 years	M	heart	right ventricle
E-GEOD-14955	10/27/06	GSM373440.CEL	GSM373440.CEL	acyanotic Tetralogy of Fallot congenital heart disease		10 years	M	heart	right ventricle
E-GEOD-14956	05/17/06	GSM373446.CEL	GSM373446.CEL	cyanotic Tetralogy of Fallot congenital heart disease		11 years	M	heart	right ventricle
E-GEOD-14956	12/08/06	GSM373451.CEL	GSM373451.CEL	cyanotic Tetralogy of Fallot congenital heart disease		11 years	F	heart	right ventricle
E-GEOD-14956	07/20/06	GSM373449.CEL	GSM373449.CEL	cyanotic Tetralogy of Fallot congenital heart disease		11 years	M	heart	right ventricle
E-GEOD-14956	05/17/06	GSM373445.CEL	GSM373445.CEL	cyanotic Tetralogy of Fallot congenital heart disease		11 years	M	heart	right ventricle
E-GEOD-14956	07/06/06	GSM373448.CEL	GSM373448.CEL	cyanotic Tetralogy of Fallot congenital heart disease		11 years	M	heart	right ventricle
E-GEOD-14956	07/06/06	GSM373450.CEL	GSM373450.CEL	cyanotic Tetralogy of Fallot congenital heart disease		11 years	F	heart	right ventricle
E-GEOD-14956	05/17/06	GSM373447.CEL	GSM373447.CEL	cyanotic Tetralogy of Fallot congenital heart disease		11 years	M	heart	right ventricle
E-GEOD-15090	07/13/07	GSM377470.CEL	GSM377470.CEL	normal		39 years	M	skeletal muscle	biceps brachii
E-GEOD-15090	07/10/07	GSM377468.CEL	GSM377468.CEL	Facioscapulohumeral muscular dystrophy (FSHD)		38 years	M	skeletal muscle	biceps brachii
E-GEOD-15090	07/10/07	GSM377467.CEL	GSM377467.CEL	normal		16 years	M	skeletal muscle	biceps brachii
E-GEOD-15090	07/13/07	GSM377466.CEL	GSM377466.CEL	normal	FSHD carrier	54 years	M	skeletal muscle	biceps brachii
E-GEOD-15090	07/10/07	GSM377465.CEL	GSM377465.CEL	Facioscapulohumeral muscular dystrophy (FSHD)		12 years	M	skeletal muscle	biceps brachii
E-GEOD-15090	07/10/07	GSM377464.CEL	GSM377464.CEL	normal		35 years	F	skeletal muscle	Deltoid
E-GEOD-15090	07/10/07	GSM377463.CEL	GSM377463.CEL	normal	FSHD carrier	32 years	F	skeletal muscle	Deltoid
E-GEOD-15090	07/10/07	GSM377462.CEL	GSM377462.CEL	Facioscapulohumeral muscular dystrophy (FSHD)		14 years	F	skeletal muscle	Deltoid
E-GEOD-15090	07/10/07	GSM377461.CEL	GSM377461.CEL	normal		38 years	F	skeletal muscle	Deltoid
E-GEOD-15090	07/10/07	GSM377460.CEL	GSM377460.CEL	normal	FSHD carrier	66 years	M	skeletal muscle	Deltoid
E-GEOD-15090	07/10/07	GSM377459.CEL	GSM377459.CEL	Facioscapulohumeral muscular dystrophy (FSHD)		30 years	M	skeletal muscle	Deltoid
E-GEOD-15090	07/10/07	GSM377458.CEL	GSM377458.CEL	normal		41 years	F	skeletal muscle	biceps brachii
E-GEOD-15090	07/10/07	GSM377457.CEL	GSM377457.CEL	normal	FSHD carrier	69 years	F	skeletal muscle	biceps brachii
E-GEOD-15090	07/10/07	GSM377456.CEL	GSM377456.CEL	Facioscapulohumeral muscular dystrophy (FSHD)		49 years	M	skeletal muscle	biceps brachii
E-GEOD-17476	10/14/04	GSM435890_E_161K_DCM-B.CEL	GSM435890_E_161K_DCM.B.CEL	E161K LMNA mutant		adult	M	heart	left ventricle
E-GEOD-17476	10/14/04	GSM435889_E_161K_DCM-A.CEL	GSM435889_E_161K_DCM.A.CEL	E161K LMNA mutant		adult	M	heart	left ventricle
E-GEOD-17476	10/14/04	GSM435892_ISC_Cntl-B.CEL	GSM435892_ISC_Cntl.B.CEL	ischemic cardiomyopathy		adult	M	heart	left ventricle
E-GEOD-17476	10/14/04	GSM435891_ISC_Cntl-A.CEL	GSM435891_ISC_Cntl.A.CEL	ischemic cardiomyopathy		adult	M	heart	left ventricle
E-GEOD-18715	07/24/08	GSM464631_C16.CEL	GSM464631_C16.CEL	normal		2 years	M	skeletal muscle	wna
E-GEOD-18715	07/24/08	GSM464630_C15.CEL	GSM464630_C15.CEL	normal		5 years	F	skeletal muscle	wna
E-GEOD-18715	07/24/08	GSM464629_C14.CEL	GSM464629_C14.CEL	normal		2 years	M	skeletal muscle	wna
E-GEOD-18715	07/24/08	GSM464628_C13.CEL	GSM464628_C13.CEL	normal		9 years	M	skeletal muscle	wna
E-GEOD-18715	07/24/08	GSM464626_C11.CEL	GSM464626_C11.CEL	normal		0 years	M	skeletal muscle	wna
E-GEOD-18715	08/07/07	GSM464625_C9.CEL	GSM464625_C9.CEL	normal		25 years	M	skeletal muscle	wna
E-GEOD-18715	08/07/07	GSM464624_C8.CEL	GSM464624_C8.CEL	normal		53 years	M	skeletal muscle	wna
E-GEOD-18715	08/07/07	GSM464623_C7.CEL	GSM464623_C7.CEL	normal		22 years	F	skeletal muscle	wna
E-GEOD-18715	08/07/07	GSM464622_C5.CEL	GSM464622_C5.CEL	normal		17 years	F	skeletal muscle	wna
E-GEOD-18715	08/07/07	GSM464621_C4.CEL	GSM464621_C4.CEL	normal		64 years	F	skeletal muscle	wna
E-GEOD-18715	08/07/07	GSM464620_C3.CEL	GSM464620_C3.CEL	normal		34 years	F	skeletal muscle	wna
E-GEOD-18715	08/07/07	GSM464619_P509.CEL	GSM464619_P509.CEL	DNA polymerase gamma (POLG1) mutation		4 years	F	skeletal muscle	wna
E-GEOD-18715	08/07/07	GSM464618_P477.CEL	GSM464618_P477.CEL	DNA polymerase gamma (POLG1) mutation		50 years	F	skeletal muscle	wna
E-GEOD-18715	08/07/07	GSM464617_P423.CEL	GSM464617_P423.CEL	DNA polymerase gamma (POLG1) mutation		68 years	F	skeletal muscle	wna
E-GEOD-18715	08/07/07	GSM464616_P194.CEL	GSM464616_P194.CEL	DNA polymerase gamma (POLG1) mutation		0 years	F	skeletal muscle	wna
E-GEOD-18715	07/24/08	GSM464615_P54.CEL	GSM464615_P54.CEL	DNA polymerase gamma (POLG1) mutation		23 years	F	skeletal muscle	wna
E-GEOD-18715	08/07/07	GSM464614_P38.CEL	GSM464614_P38.CEL	DNA polymerase gamma (POLG1) mutation		36 years	M	skeletal muscle	wna
E-GEOD-19420	04/24/09	GSM482974.CEL	GSM482974.CEL	normal		48 years	M	skeletal muscle	quadriceps
E-GEOD-19420	04/24/09	GSM482970.CEL	GSM482970.CEL	normal		61 years	M	skeletal muscle	quadriceps
E-GEOD-19420	04/24/09	GSM482968.CEL	GSM482968.CEL	normal		48 years	M	skeletal muscle	quadriceps
E-GEOD-19420	04/24/09	GSM482961.CEL	GSM482961.CEL	normal		49 years	M	skeletal muscle	quadriceps
E-GEOD-19420	04/24/09	GSM482960.CEL	GSM482960.CEL	normal		62 years	M	skeletal muscle	quadriceps
E-GEOD-19420	04/24/09	GSM482958.CEL	GSM482958.CEL	normal		61 years	M	skeletal muscle	quadriceps
E-GEOD-19420	04/24/09	GSM482957.CEL	GSM482957.CEL	normal		64 years	M	skeletal muscle	quadriceps
E-GEOD-19420	04/01/09	GSM482948.CEL	GSM482948.CEL	normal		49 years	M	skeletal muscle	quadriceps
E-GEOD-19420	04/01/09	GSM482947.CEL	GSM482947.CEL	normal		56 years	M	skeletal muscle	quadriceps
E-GEOD-19420	04/01/09	GSM482945.CEL	GSM482945.CEL	normal		59 years	M	skeletal muscle	quadriceps
E-GEOD-19420	04/01/09	GSM482938.CEL	GSM482938.CEL	normal		57 years	M	skeletal muscle	quadriceps
E-GEOD-19420	04/01/09	GSM482934.CEL	GSM482934.CEL	normal		59 years	M	skeletal muscle	quadriceps
E-GEOD-19420	04/24/09	GSM482971.CEL	GSM482971.CEL	pre-type 2 diabetes (DM2)		56 years	M	skeletal muscle	quadriceps
E-GEOD-19420	04/24/09	GSM482969.CEL	GSM482969.CEL	pre-type 2 diabetes (DM2)		58 years	M	skeletal muscle	quadriceps
E-GEOD-19420	04/24/09	GSM482967.CEL	GSM482967.CEL	pre-type 2 diabetes (DM2)		62 years	M	skeletal muscle	quadriceps
E-GEOD-19420	04/24/09	GSM482966.CEL	GSM482966.CEL	pre-type 2 diabetes (DM2)		54 years	M	skeletal muscle	quadriceps
E-GEOD-19420	04/24/09	GSM482963.CEL	GSM482963.CEL	pre-type 2 diabetes (DM2)		54 years	M	skeletal muscle	quadriceps
E-GEOD-19420	04/24/09	GSM482962.CEL	GSM482962.CEL	pre-type 2 diabetes (DM2)		57 years	M	skeletal muscle	quadriceps
E-GEOD-19420	04/24/09	GSM482959.CEL	GSM482959.CEL	pre-type 2 diabetes (DM2)		60 years	M	skeletal muscle	quadriceps
E-GEOD-19420	04/01/09	GSM482953.CEL	GSM482953.CEL	pre-type 2 diabetes (DM2)		61 years	M	skeletal muscle	quadriceps
E-GEOD-19420	04/01/09	GSM482944.CEL	GSM482944.CEL	pre-type 2 diabetes (DM2)		57 years	M	skeletal muscle	quadriceps
E-GEOD-19420	04/01/09	GSM482939.CEL	GSM482939.CEL	pre-type 2 diabetes (DM2)		58 years	M	skeletal muscle	quadriceps
E-GEOD-19420	04/01/09	GSM482935.CEL	GSM482935.CEL	pre-type 2 diabetes (DM2)		48 years	M	skeletal muscle	quadriceps
E-GEOD-19420	04/01/09	GSM482933.CEL	GSM482933.CEL	pre-type 2 diabetes (DM2)		67 years	M	skeletal muscle	quadriceps
E-GEOD-19420	04/24/09	GSM482972.CEL	GSM482972.CEL	type 2 diabetes (DM2)		66 years	M	skeletal muscle	quadriceps
E-GEOD-19420	04/24/09	GSM482964.CEL	GSM482964.CEL	type 2 diabetes (DM2)		60 years	M	skeletal muscle	quadriceps
E-GEOD-19420	04/01/09	GSM482955.CEL	GSM482955.CEL	type 2 diabetes (DM2)		49 years	M	skeletal muscle	quadriceps
E-GEOD-19420	04/01/09	GSM482954.CEL	GSM482954.CEL	type 2 diabetes (DM2)		68 years	M	skeletal muscle	quadriceps
E-GEOD-19420	04/24/09	GSM482951.CEL	GSM482951.CEL	type 2 diabetes (DM2)		51 years	M	skeletal muscle	quadriceps
E-GEOD-19420	04/01/09	GSM482949.CEL	GSM482949.CEL	type 2 diabetes (DM2)		66 years	M	skeletal muscle	quadriceps
E-GEOD-19420	04/01/09	GSM482946.CEL	GSM482946.CEL	type 2 diabetes (DM2)		54 years	M	skeletal muscle	quadriceps
E-GEOD-19420	04/01/09	GSM482942.CEL	GSM482942.CEL	type 2 diabetes (DM2)		56 years	M	skeletal muscle	quadriceps
E-GEOD-19420	04/01/09	GSM482940.CEL	GSM482940.CEL	type 2 diabetes (DM2)		67 years	M	skeletal muscle	quadriceps
E-GEOD-19420	04/01/09	GSM482936.CEL	GSM482936.CEL	type 2 diabetes (DM2)		64 years	M	skeletal muscle	quadriceps
E-GEOD-19420	04/24/09	GSM482973.CEL	GSM482973.CEL	type 2 diabetes (DM2)	exercise training for a year	66 years	M	skeletal muscle	quadriceps
E-GEOD-19420	04/24/09	GSM482965.CEL	GSM482965.CEL	type 2 diabetes (DM2)	exercise training for a year	60 years	M	skeletal muscle	quadriceps
E-GEOD-19420	04/01/09	GSM482952.CEL	GSM482952.CEL	type 2 diabetes (DM2)	exercise training for a year	51 years	M	skeletal muscle	quadriceps
E-GEOD-19420	04/01/09	GSM482950.CEL	GSM482950.CEL	type 2 diabetes (DM2)	exercise training for a year	66 years	M	skeletal muscle	quadriceps
E-GEOD-19420	04/01/09	GSM482943.CEL	GSM482943.CEL	type 2 diabetes (DM2)	exercise training for a year	56 years	M	skeletal muscle	quadriceps
E-GEOD-19420	04/01/09	GSM482941.CEL	GSM482941.CEL	type 2 diabetes (DM2)	exercise training for a year	67 years	M	skeletal muscle	quadriceps
E-GEOD-19420	04/01/09	GSM482937.CEL	GSM482937.CEL	type 2 diabetes (DM2)	exercise training for a year	64 years	M	skeletal muscle	quadriceps
E-GEOD-21164	07/04/08	GSM529754.CEL	GSM529754.CEL	normal		71 years	F	skeletal muscle	quadriceps
E-GEOD-21164	07/04/08	GSM529756.CEL	GSM529756.CEL	normal		71 years	F	skeletal muscle	quadriceps
E-GEOD-21164	07/04/08	GSM529753.CEL	GSM529753.CEL	normal		71 years	M	skeletal muscle	quadriceps
E-GEOD-21164	07/04/08	GSM529755.CEL	GSM529755.CEL	normal		71 years	F	skeletal muscle	quadriceps
E-GEOD-21164	07/04/08	GSM529757.CEL	GSM529757.CEL	ischemic preconditioning		66 years	F	skeletal muscle	quadriceps
E-GEOD-21164	07/04/08	GSM529759.CEL	GSM529759.CEL	ischemic preconditioning		66 years	M	skeletal muscle	quadriceps
E-GEOD-21164	07/04/08	GSM529758.CEL	GSM529758.CEL	ischemic preconditioning		66 years	M	skeletal muscle	quadriceps
E-GEOD-21164	07/04/08	GSM529760.CEL	GSM529760.CEL	ischemic preconditioning		66 years	F	skeletal muscle	quadriceps
E-GEOD-21164	07/04/08	GSM529763.CEL	GSM529763.CEL	1 hour ischaemia		71 years	F	skeletal muscle	quadriceps
E-GEOD-21164	07/04/08	GSM529764.CEL	GSM529764.CEL	1 hour ischaemia		71 years	F	skeletal muscle	quadriceps
E-GEOD-21164	07/04/08	GSM529762.CEL	GSM529762.CEL	1 hour ischaemia		71 years	F	skeletal muscle	quadriceps
E-GEOD-21164	07/04/08	GSM529761.CEL	GSM529761.CEL	1 hour ischaemia		71 years	M	skeletal muscle	quadriceps
E-GEOD-21164	07/04/08	GSM529765.CEL	GSM529765.CEL	ischemic preconditioning	1 hour ischemia	66 years	F	skeletal muscle	quadriceps
E-GEOD-21164	07/04/08	GSM529767.CEL	GSM529767.CEL	ischemic preconditioning	1 hour ischemia	66 years	M	skeletal muscle	quadriceps
E-GEOD-21164	07/04/08	GSM529768.CEL	GSM529768.CEL	ischemic preconditioning	1 hour ischemia	66 years	F	skeletal muscle	quadriceps
E-GEOD-21164	07/04/08	GSM529766.CEL	GSM529766.CEL	ischemic preconditioning	1 hour ischemia	66 years	M	skeletal muscle	quadriceps
E-GEOD-21496	03/15/07	GSM537131.CEL	GSM537131.CEL	normal	Sedentary	22 years	M	skeletal muscle	quadriceps
E-GEOD-21496	03/15/07	GSM537140.CEL	GSM537140.CEL	normal	Sedentary	22 years	M	skeletal muscle	quadriceps
E-GEOD-21496	03/15/07	GSM537125.CEL	GSM537125.CEL	normal	Sedentary	22 years	M	skeletal muscle	quadriceps
E-GEOD-21496	03/15/07	GSM537128.CEL	GSM537128.CEL	normal	Sedentary	22 years	M	skeletal muscle	quadriceps
E-GEOD-21496	03/16/07	GSM537122.CEL	GSM537122.CEL	normal	Sedentary	22 years	M	skeletal muscle	quadriceps
E-GEOD-21496	03/15/07	GSM537137.CEL	GSM537137.CEL	normal	Sedentary	22 years	M	skeletal muscle	quadriceps
E-GEOD-21496	03/15/07	GSM537134.CEL	GSM537134.CEL	normal	Sedentary	22 years	M	skeletal muscle	quadriceps
E-GEOD-21496	03/16/07	GSM537121.CEL	GSM537121.CEL	48 hours unloading	Sedentary	22 years	M	skeletal muscle	quadriceps
E-GEOD-21496	03/15/07	GSM537130.CEL	GSM537130.CEL	48 hours unloading	Sedentary	22 years	M	skeletal muscle	quadriceps
E-GEOD-21496	03/15/07	GSM537127.CEL	GSM537127.CEL	48 hours unloading	Sedentary	22 years	M	skeletal muscle	quadriceps
E-GEOD-21496	03/15/07	GSM537136.CEL	GSM537136.CEL	48 hours unloading	Sedentary	22 years	M	skeletal muscle	quadriceps
E-GEOD-21496	03/15/07	GSM537139.CEL	GSM537139.CEL	48 hours unloading	Sedentary	22 years	M	skeletal muscle	quadriceps
E-GEOD-21496	03/16/07	GSM537124.CEL	GSM537124.CEL	48 hours unloading	Sedentary	22 years	M	skeletal muscle	quadriceps
E-GEOD-21496	03/15/07	GSM537133.CEL	GSM537133.CEL	48 hours unloading	Sedentary	22 years	M	skeletal muscle	quadriceps
E-GEOD-21496	03/16/07	GSM537120.CEL	GSM537120.CEL	48 hours unloading and 24 hours reloading	Sedentary	22 years	M	skeletal muscle	quadriceps
E-GEOD-21496	03/15/07	GSM537129.CEL	GSM537129.CEL	48 hours unloading and 24 hours reloading	Sedentary	22 years	M	skeletal muscle	quadriceps
E-GEOD-21496	03/15/07	GSM537135.CEL	GSM537135.CEL	48 hours unloading and 24 hours reloading	Sedentary	22 years	M	skeletal muscle	quadriceps
E-GEOD-21496	03/15/07	GSM537138.CEL	GSM537138.CEL	48 hours unloading and 24 hours reloading	Sedentary	22 years	M	skeletal muscle	quadriceps
E-GEOD-21496	03/15/07	GSM537132.CEL	GSM537132.CEL	48 hours unloading and 24 hours reloading	Sedentary	22 years	M	skeletal muscle	quadriceps
E-GEOD-21496	03/16/07	GSM537123.CEL	GSM537123.CEL	48 hours unloading and 24 hours reloading	Sedentary	22 years	M	skeletal muscle	quadriceps
E-GEOD-21496	03/15/07	GSM537126.CEL	GSM537126.CEL	48 hours unloading and 24 hours reloading	Sedentary	22 years	M	skeletal muscle	quadriceps
E-GEOD-21497	08/19/05	GSM537151.CEL	GSM537151.CEL	2 days post spinal cord injury		44 years	M	skeletal muscle	quadriceps
E-GEOD-21497	06/02/06	GSM537155.CEL	GSM537155.CEL	2 days post spinal cord injury		44 years	M	skeletal muscle	quadriceps
E-GEOD-21497	06/02/06	GSM537153.CEL	GSM537153.CEL	2 days post spinal cord injury		44 years	M	skeletal muscle	quadriceps
E-GEOD-21497	07/14/04	GSM537143.CEL	GSM537143.CEL	2 days post spinal cord injury		44 years	M	skeletal muscle	quadriceps
E-GEOD-21497	08/19/05	GSM537149.CEL	GSM537149.CEL	2 days post spinal cord injury		44 years	M	skeletal muscle	quadriceps
E-GEOD-21497	06/02/06	GSM537159.CEL	GSM537159.CEL	2 days post spinal cord injury		44 years	F	skeletal muscle	quadriceps
E-GEOD-21497	08/19/05	GSM537147.CEL	GSM537147.CEL	2 days post spinal cord injury		44 years	F	skeletal muscle	quadriceps
E-GEOD-21497	06/02/06	GSM537157.CEL	GSM537157.CEL	2 days post spinal cord injury		44 years	M	skeletal muscle	quadriceps
E-GEOD-21497	08/06/04	GSM537145.CEL	GSM537145.CEL	2 days post spinal cord injury		44 years	M	skeletal muscle	quadriceps
E-GEOD-21497	07/14/04	GSM537141.CEL	GSM537141.CEL	2 days post spinal cord injury		44 years	M	skeletal muscle	quadriceps
E-GEOD-21497	06/02/06	GSM537156.CEL	GSM537156.CEL	5 days post spinal cord injury		44 years	M	skeletal muscle	quadriceps
E-GEOD-21497	07/14/04	GSM537142.CEL	GSM537142.CEL	5 days post spinal cord injury		44 years	M	skeletal muscle	quadriceps
E-GEOD-21497	06/02/06	GSM537160.CEL	GSM537160.CEL	5 days post spinal cord injury		44 years	F	skeletal muscle	quadriceps
E-GEOD-21497	07/14/04	GSM537144.CEL	GSM537144.CEL	5 days post spinal cord injury		44 years	M	skeletal muscle	quadriceps
E-GEOD-21497	06/02/06	GSM537154.CEL	GSM537154.CEL	5 days post spinal cord injury		44 years	M	skeletal muscle	quadriceps
E-GEOD-21497	08/19/05	GSM537152.CEL	GSM537152.CEL	5 days post spinal cord injury		44 years	M	skeletal muscle	quadriceps
E-GEOD-21497	08/06/04	GSM537146.CEL	GSM537146.CEL	5 days post spinal cord injury		44 years	M	skeletal muscle	quadriceps
E-GEOD-21497	08/19/05	GSM537148.CEL	GSM537148.CEL	5 days post spinal cord injury		44 years	M	skeletal muscle	quadriceps
E-GEOD-21497	08/19/05	GSM537150.CEL	GSM537150.CEL	5 days post spinal cord injury		44 years	M	skeletal muscle	quadriceps
E-GEOD-21497	06/02/06	GSM537158.CEL	GSM537158.CEL	5 days post spinal cord injury		44 years	M	skeletal muscle	quadriceps
E-GEOD-21610	06/29/05	GSM545695.cel	GSM545695.cel	dilated cardiomyopathy	after ventricular assist device: Novacor	32 years	M	heart	myocardium
E-GEOD-21610	07/07/05	GSM545696.cel	GSM545696.cel	dilated cardiomyopathy	after ventricular assist device: Thoratec	40 years	M	heart	myocardium
E-GEOD-21610	06/29/05	GSM545697.cel	GSM545697.cel	dilated cardiomyopathy	after ventricular assist device: Heartmate I	59 years	M	heart	myocardium
E-GEOD-21610	06/29/05	GSM545698.cel	GSM545698.cel	dilated cardiomyopathy	after ventricular assist device: Novacor	44 years	M	heart	myocardium
E-GEOD-21610	07/07/05	GSM545699.cel	GSM545699.cel	dilated cardiomyopathy	after ventricular assist device: Thoratec (iafter ventricular assist devices)	59 years	M	heart	myocardium
E-GEOD-21610	07/07/05	GSM545701.cel	GSM545701.cel	dilated cardiomyopathy	after ventricular assist device: Novacor	60 years	F	heart	myocardium
E-GEOD-21610	08/18/05	GSM545703.cel	GSM545703.cel	dilated cardiomyopathy	after ventricular assist device: CorAide	65 years	M	heart	myocardium
E-GEOD-21610	07/28/05	GSM545704.cel	GSM545704.cel	dilated cardiomyopathy	after ventricular assist device: DuraHeart	55 years	F	heart	myocardium
E-GEOD-21610	07/27/05	GSM545707.cel	GSM545707.cel	dilated cardiomyopathy	after ventricular assist device: DuraHeart	44 years	M	heart	myocardium
E-GEOD-21610	08/02/05	GSM545708.cel	GSM545708.cel	dilated cardiomyopathy	after ventricular assist device: Thoratec	63 years	M	heart	myocardium
E-GEOD-21610	07/28/05	GSM545711.cel	GSM545711.cel	dilated cardiomyopathy	after ventricular assist device: Novacor	16 years	M	heart	myocardium
E-GEOD-21610	07/20/05	GSM545712.cel	GSM545712.cel	dilated cardiomyopathy	after ventricular assist device: Heartmate I	56 years	M	heart	myocardium
E-GEOD-21610	07/28/05	GSM545713.cel	GSM545713.cel	dilated cardiomyopathy	after ventricular assist device: DuraHeart	40 years	M	heart	myocardium
E-GEOD-21610	07/20/05	GSM545714.cel	GSM545714.cel	dilated cardiomyopathy	after ventricular assist device: Heartmate I	59 years	M	heart	myocardium
E-GEOD-21610	09/02/05	GSM545715.cel	GSM545715.cel	dilated cardiomyopathy	after ventricular assist device: Heartmate I	45 years	M	heart	myocardium
E-GEOD-21610	07/15/05	GSM545716.cel	GSM545716.cel	dilated cardiomyopathy	after ventricular assist device: Novacor	58 years	M	heart	myocardium
E-GEOD-21610	09/02/05	GSM545718.cel	GSM545718.cel	dilated cardiomyopathy	after ventricular assist device: Heartmate I	47 years	M	heart	myocardium
E-GEOD-21610	08/18/05	GSM545720.cel	GSM545720.cel	dilated cardiomyopathy	after ventricular assist device: Thoratec (biafter ventricular assist devices)	50 years	M	heart	myocardium
E-GEOD-21610	08/18/05	GSM545722.cel	GSM545722.cel	dilated cardiomyopathy	after ventricular assist device: Novacor	66 years	M	heart	myocardium
E-GEOD-21610	09/02/05	GSM545723.cel	GSM545723.cel	dilated cardiomyopathy	after ventricular assist device: CorAide	29 years	M	heart	myocardium
E-GEOD-21610	09/02/05	GSM545719.cel	GSM545719.cel	dilated cardiomyopathy	after ventricular assist device: Heartmate I	33 years	M	heart	myocardium
E-GEOD-21610	07/07/05	GSM545700.cel	GSM545700.cel	ischemic cardiomyopathy	after ventricular assist device: Heartmate I	52 years	M	heart	myocardium
E-GEOD-21610	07/07/05	GSM545702.cel	GSM545702.cel	ischemic cardiomyopathy	after ventricular assist device: Novacor	66 years	M	heart	myocardium
E-GEOD-21610	07/28/05	GSM545705.cel	GSM545705.cel	ischemic cardiomyopathy	after ventricular assist device: Heartmate I	67 years	M	heart	myocardium
E-GEOD-21610	08/02/05	GSM545706.cel	GSM545706.cel	ischemic cardiomyopathy	after ventricular assist device: Novacor	52 years	M	heart	myocardium
E-GEOD-21610	07/20/05	GSM545709.cel	GSM545709.cel	ischemic cardiomyopathy	after ventricular assist device: Novacor	63 years	M	heart	myocardium
E-GEOD-21610	08/02/05	GSM545710.cel	GSM545710.cel	ischemic cardiomyopathy	after ventricular assist device: Incor	43 years	M	heart	myocardium
E-GEOD-21610	07/15/05	GSM545717.cel	GSM545717.cel	ischemic cardiomyopathy	after ventricular assist device: DuraHeart	68 years	M	heart	myocardium
E-GEOD-21610	08/18/05	GSM545721.cel	GSM545721.cel	ischemic cardiomyopathy	after ventricular assist device: Heartmate I	57 years	M	heart	myocardium
E-GEOD-21610	09/02/05	GSM545724.cel	GSM545724.cel	ischemic cardiomyopathy	after ventricular assist device: DuraHeart	50 years	M	heart	myocardium
E-GEOD-21610	06/29/05	GSM545665.cel	GSM545665.cel	dilated cardiomyopathy	before ventricular assist device: Novacor	32 years	M	heart	myocardium
E-GEOD-21610	07/07/05	GSM545666.cel	GSM545666.cel	dilated cardiomyopathy	before ventricular assist device: Thoratec	40 years	M	heart	myocardium
E-GEOD-21610	06/29/05	GSM545667.cel	GSM545667.cel	dilated cardiomyopathy	before ventricular assist device: Heartmate I	59 years	M	heart	myocardium
E-GEOD-21610	06/29/05	GSM545668.cel	GSM545668.cel	dilated cardiomyopathy	before ventricular assist device: Novacor	44 years	M	heart	myocardium
E-GEOD-21610	07/07/05	GSM545669.cel	GSM545669.cel	dilated cardiomyopathy	before ventricular assist device: Thoratec (ibefore ventricular assist devices)	59 years	M	heart	myocardium
E-GEOD-21610	07/07/05	GSM545671.cel	GSM545671.cel	dilated cardiomyopathy	before ventricular assist device: Novacor	60 years	F	heart	myocardium
E-GEOD-21610	08/18/05	GSM545673.cel	GSM545673.cel	dilated cardiomyopathy	before ventricular assist device: CorAide	65 years	M	heart	myocardium
E-GEOD-21610	07/28/05	GSM545674.cel	GSM545674.cel	dilated cardiomyopathy	before ventricular assist device: DuraHeart	55 years	F	heart	myocardium
E-GEOD-21610	07/27/05	GSM545677.cel	GSM545677.cel	dilated cardiomyopathy	before ventricular assist device: DuraHeart	44 years	M	heart	myocardium
E-GEOD-21610	08/02/05	GSM545678.cel	GSM545678.cel	dilated cardiomyopathy	before ventricular assist device: Thoratec	63 years	M	heart	myocardium
E-GEOD-21610	07/28/05	GSM545681.cel	GSM545681.cel	dilated cardiomyopathy	before ventricular assist device: Novacor	16 years	M	heart	myocardium
E-GEOD-21610	08/02/05	GSM545682.cel	GSM545682.cel	dilated cardiomyopathy	before ventricular assist device: Heartmate I	56 years	M	heart	myocardium
E-GEOD-21610	09/02/05	GSM545683.cel	GSM545683.cel	dilated cardiomyopathy	before ventricular assist device: DuraHeart	40 years	M	heart	myocardium
E-GEOD-21610	07/20/05	GSM545684.cel	GSM545684.cel	dilated cardiomyopathy	before ventricular assist device: Heartmate I	59 years	M	heart	myocardium
E-GEOD-21610	07/15/05	GSM545685.cel	GSM545685.cel	dilated cardiomyopathy	before ventricular assist device: Heartmate I	45 years	M	heart	myocardium
E-GEOD-21610	09/02/05	GSM545686.cel	GSM545686.cel	dilated cardiomyopathy	before ventricular assist device: Novacor	58 years	M	heart	myocardium
E-GEOD-21610	09/02/05	GSM545688.cel	GSM545688.cel	dilated cardiomyopathy	before ventricular assist device: Heartmate I	47 years	M	heart	myocardium
E-GEOD-21610	08/18/05	GSM545690.cel	GSM545690.cel	dilated cardiomyopathy	before ventricular assist device: Thoratec (bibefore ventricular assist devices)	50 years	M	heart	myocardium
E-GEOD-21610	08/18/05	GSM545692.cel	GSM545692.cel	dilated cardiomyopathy	before ventricular assist device: Novacor	66 years	M	heart	myocardium
E-GEOD-21610	09/02/05	GSM545693.cel	GSM545693.cel	dilated cardiomyopathy	before ventricular assist device: CorAide	29 years	M	heart	myocardium
E-GEOD-21610	09/02/05	GSM545689.cel	GSM545689.cel	dilated cardiomyopathy	before ventricular assist device: Heartmate I	33 years	M	heart	myocardium
E-GEOD-21610	07/07/05	GSM545670.cel	GSM545670.cel	ischemic cardiomyopathy	before ventricular assist device: Heartmate I	52 years	M	heart	myocardium
E-GEOD-21610	07/07/05	GSM545672.cel	GSM545672.cel	ischemic cardiomyopathy	before ventricular assist device: Novacor	66 years	M	heart	myocardium
E-GEOD-21610	09/02/05	GSM545675.cel	GSM545675.cel	ischemic cardiomyopathy	before ventricular assist device: Heartmate I	67 years	M	heart	myocardium
E-GEOD-21610	08/02/05	GSM545676.cel	GSM545676.cel	ischemic cardiomyopathy	before ventricular assist device: Novacor	52 years	M	heart	myocardium
E-GEOD-21610	09/02/05	GSM545679.cel	GSM545679.cel	ischemic cardiomyopathy	before ventricular assist device: Novacor	63 years	M	heart	myocardium
E-GEOD-21610	07/22/05	GSM545680.cel	GSM545680.cel	ischemic cardiomyopathy	before ventricular assist device: Incor	43 years	M	heart	myocardium
E-GEOD-21610	07/15/05	GSM545687.cel	GSM545687.cel	ischemic cardiomyopathy	before ventricular assist device: DuraHeart	68 years	M	heart	myocardium
E-GEOD-21610	08/18/05	GSM545691.cel	GSM545691.cel	ischemic cardiomyopathy	before ventricular assist device: Heartmate I	57 years	M	heart	myocardium
E-GEOD-21610	09/02/05	GSM545694.cel	GSM545694.cel	ischemic cardiomyopathy	before ventricular assist device: DuraHeart	50 years	M	heart	myocardium
E-GEOD-21610	07/21/05	GSM545664.cel	GSM545664.cel	normal		23 years	F	heart	myocardium
E-GEOD-21610	07/19/05	GSM545659.cel	GSM545659.cel	normal		5 years	M	heart	myocardium
E-GEOD-21610	07/21/05	GSM545662.cel	GSM545662.cel	normal		31 years	M	heart	myocardium
E-GEOD-21610	07/21/05	GSM545658.cel	GSM545658.cel	normal		40 years	M	heart	myocardium
E-GEOD-21610	07/19/05	GSM545660.cel	GSM545660.cel	normal		28 years	M	heart	myocardium
E-GEOD-21610	07/21/05	GSM545661.cel	GSM545661.cel	normal		64 years	M	heart	myocardium
E-GEOD-21610	07/19/05	GSM545657.cel	GSM545657.cel	normal		18 years	F	heart	myocardium
E-GEOD-21610	07/21/05	GSM545663.cel	GSM545663.cel	normal		23 years	M	heart	myocardium
E-GEOD-22435	03/16/04	GSM557528.CEL	GSM557528.CEL	normal		64 years	F	skeletal muscle	rectus abdominis
E-GEOD-22435	03/16/04	GSM557527.CEL	GSM557527.CEL	normal		52 years	F	skeletal muscle	rectus abdominis
E-GEOD-22435	03/16/04	GSM557525.CEL	GSM557525.CEL	Impaired glucose tolerance (IGT) or type 2 diabetes (DM2)		54 years	F	skeletal muscle	rectus abdominis
E-GEOD-22435	03/16/04	GSM557524.CEL	GSM557524.CEL	normal		61 years	F	skeletal muscle	rectus abdominis
E-GEOD-22435	03/16/04	GSM557523.CEL	GSM557523.CEL	Impaired glucose tolerance (IGT) or type 2 diabetes (DM2)		56 years	F	skeletal muscle	rectus abdominis
E-GEOD-22435	03/16/04	GSM557522.CEL	GSM557522.CEL	normal		63 years	F	skeletal muscle	rectus abdominis
E-GEOD-22435	03/16/04	GSM557521.CEL	GSM557521.CEL	normal		60 years	F	skeletal muscle	rectus abdominis
E-GEOD-22435	03/16/04	GSM557520.CEL	GSM557520.CEL	normal		62 years	F	skeletal muscle	rectus abdominis
E-GEOD-22435	03/03/04	GSM557519.CEL	GSM557519.CEL	Impaired glucose tolerance (IGT) or type 2 diabetes (DM2)		59 years	F	skeletal muscle	rectus abdominis
E-GEOD-22435	03/03/04	GSM557518.CEL	GSM557518.CEL	normal		59 years	F	skeletal muscle	rectus abdominis
E-GEOD-22435	03/03/04	GSM557517.CEL	GSM557517.CEL	Impaired glucose tolerance (IGT) or type 2 diabetes (DM2)		62 years	F	skeletal muscle	rectus abdominis
E-GEOD-22435	03/03/04	GSM557516.CEL	GSM557516.CEL	Impaired glucose tolerance (IGT) or type 2 diabetes (DM2)		69 years	F	skeletal muscle	rectus abdominis
E-GEOD-22435	03/03/04	GSM557515.CEL	GSM557515.CEL	normal		67 years	F	skeletal muscle	rectus abdominis
E-GEOD-22435	03/03/04	GSM557514.CEL	GSM557514.CEL	normal		56 years	F	skeletal muscle	rectus abdominis
E-GEOD-22435	03/03/04	GSM557513.CEL	GSM557513.CEL	Impaired glucose tolerance (IGT) or type 2 diabetes (DM2)		60 years	F	skeletal muscle	rectus abdominis
E-GEOD-22435	03/03/04	GSM557512.CEL	GSM557512.CEL	normal		52 years	F	skeletal muscle	rectus abdominis
E-GEOD-2328	02/17/04	GSM42739.CEL	GSM42739.CEL	normal	waste skeletal muscle from reconstructive surgery		F	skeletal muscle	wna
E-GEOD-2328	02/17/04	GSM42740.CEL	GSM42740.CEL	normal	waste skeletal muscle from reconstructive surgery		F	skeletal muscle	wna
E-GEOD-2328	02/17/04	GSM42735.CEL	GSM42735.CEL	normal	waste skeletal muscle from reconstructive surgery		F	skeletal muscle	wna
E-GEOD-2328	02/17/04	GSM42737.CEL	GSM42737.CEL	normal	waste skeletal muscle from reconstructive surgery		M	skeletal muscle	wna
E-GEOD-2328	02/17/04	GSM42733.CEL	GSM42733.CEL	normal	waste skeletal muscle from reconstructive surgery		F	skeletal muscle	wna
E-GEOD-2328	02/17/04	GSM42736.CEL	GSM42736.CEL	normal	waste skeletal muscle from reconstructive surgery		M	skeletal muscle	wna
E-GEOD-2328	02/17/04	GSM42732.CEL	GSM42732.CEL	normal	waste skeletal muscle from reconstructive surgery		F	skeletal muscle	wna
E-GEOD-2328	02/17/04	GSM42738.CEL	GSM42738.CEL	normal	waste skeletal muscle from reconstructive surgery		F	skeletal muscle	wna
E-GEOD-2328	02/17/04	GSM42734.CEL	GSM42734.CEL	normal	waste skeletal muscle from reconstructive surgery		M	skeletal muscle	wna
E-GEOD-24235	08/08/06	GSM596057.CEL	GSM596057.CEL	normal	resting	23 years	F	skeletal muscle	biceps brachii
E-GEOD-24235	08/08/06	GSM596056.CEL	GSM596056.CEL	normal	resting	23 years	F	skeletal muscle	biceps brachii
E-GEOD-24235	08/08/06	GSM596055.CEL	GSM596055.CEL	normal	resting	23 years	F	skeletal muscle	biceps brachii
E-GEOD-24235	06/29/05	GSM596054.CEL	GSM596054.CEL	normal	resting	23 years	F	skeletal muscle	biceps brachii
E-GEOD-24235	08/08/06	GSM596053.CEL	GSM596053.CEL	normal	trained	23 years	F	skeletal muscle	biceps brachii	24 hours post acute resistance exercise following 12-week resistance training
E-GEOD-24235	08/08/06	GSM596052.CEL	GSM596052.CEL	normal	trained	23 years	F	skeletal muscle	biceps brachii	24 hours post acute resistance exercise following 12-week resistance training
E-GEOD-24235	08/08/06	GSM596051.CEL	GSM596051.CEL	normal	trained	23 years	F	skeletal muscle	biceps brachii	24 hours post acute resistance exercise following 12-week resistance training
E-GEOD-24235	07/25/06	GSM596037.CEL	GSM596037.CEL	normal	resting	23 years	F	skeletal muscle	biceps brachii
E-GEOD-24235	03/09/05	GSM596005.CEL	GSM596005.CEL	normal	resting	23 years	F	skeletal muscle	biceps brachii
E-GEOD-24235	04/19/05	GSM596004.CEL	GSM596004.CEL	normal	resting	23 years	F	skeletal muscle	biceps brachii
E-GEOD-24235	03/09/05	GSM596003.CEL	GSM596003.CEL	normal	resting	23 years	F	skeletal muscle	biceps brachii
E-GEOD-24235	07/25/06	GSM596002.CEL	GSM596002.CEL	normal	trained	23 years	F	skeletal muscle	biceps brachii	4 hours post acute resistance exercise following 12-week resistance training
E-GEOD-24235	03/09/05	GSM595932.CEL	GSM595932.CEL	normal	trained	23 years	F	skeletal muscle	biceps brachii	4 hours post acute resistance exercise following 12-week resistance training
E-GEOD-24235	04/19/05	GSM595931.CEL	GSM595931.CEL	normal	trained	23 years	F	skeletal muscle	biceps brachii	4 hours post acute resistance exercise following 12-week resistance training
E-GEOD-24235	03/09/05	GSM595912.CEL	GSM595912.CEL	normal	trained	23 years	F	skeletal muscle	biceps brachii	4 hours post acute resistance exercise following 12-week resistance training
E-GEOD-24235	08/08/06	GSM595911.CEL	GSM595911.CEL	normal	resting	23 years	M	skeletal muscle	biceps brachii
E-GEOD-24235	08/08/06	GSM595910.CEL	GSM595910.CEL	normal	resting	23 years	M	skeletal muscle	biceps brachii
E-GEOD-24235	06/29/05	GSM595908.CEL	GSM595908.CEL	normal	resting	23 years	M	skeletal muscle	biceps brachii
E-GEOD-24235	08/08/06	GSM595907.CEL	GSM595907.CEL	normal	trained	23 years	M	skeletal muscle	biceps brachii	24 hours post acute resistance exercise following 12-week resistance training
E-GEOD-24235	08/08/06	GSM595906.CEL	GSM595906.CEL	normal	trained	23 years	M	skeletal muscle	biceps brachii	24 hours post acute resistance exercise following 12-week resistance training
E-GEOD-24235	06/29/05	GSM595904.CEL	GSM595904.CEL	normal	trained	23 years	M	skeletal muscle	biceps brachii	24 hours post acute resistance exercise following 12-week resistance training
E-GEOD-24235	07/26/06	GSM595902.CEL	GSM595902.CEL	normal	resting	23 years	M	skeletal muscle	biceps brachii
E-GEOD-24235	03/09/05	GSM595899.CEL	GSM595899.CEL	normal	resting	23 years	M	skeletal muscle	biceps brachii
E-GEOD-24235	07/25/06	GSM595897.CEL	GSM595897.CEL	normal	trained	23 years	M	skeletal muscle	biceps brachii	4 hours post acute resistance exercise following 12-week resistance training
E-GEOD-24235	04/19/05	GSM595896.CEL	GSM595896.CEL	normal	trained	23 years	M	skeletal muscle	biceps brachii	4 hours post acute resistance exercise following 12-week resistance training
E-GEOD-24235	03/09/05	GSM595895.CEL	GSM595895.CEL	normal	trained	23 years	M	skeletal muscle	biceps brachii	4 hours post acute resistance exercise following 12-week resistance training
E-GEOD-25462	10/12/06	GSM624974.CEL	GSM624974.CEL	normal	first degree diabetes relatives	49 years	F	skeletal muscle	quadriceps	Family history diabetes positive - 1 parent
E-GEOD-25462	10/12/06	GSM624973.CEL	GSM624973.CEL	normal		52 years	M	skeletal muscle	quadriceps
E-GEOD-25462	10/12/06	GSM624972.CEL	GSM624972.CEL	normal	first degree diabetes relatives	34 years	M	skeletal muscle	quadriceps	Family history diabetes positive - 2 parents
E-GEOD-25462	10/05/06	GSM624969.CEL	GSM624969.CEL	type 2 diabetes (DM2)		51 years	F	skeletal muscle	quadriceps
E-GEOD-25462	10/03/06	GSM624968.CEL	GSM624968.CEL	type 2 diabetes (DM2)		35 years	F	skeletal muscle	quadriceps
E-GEOD-25462	10/03/06	GSM624967.CEL	GSM624967.CEL	type 2 diabetes (DM2)		26 years	F	skeletal muscle	quadriceps
E-GEOD-25462	10/03/06	GSM624966.CEL	GSM624966.CEL	type 2 diabetes (DM2)		59 years	M	skeletal muscle	quadriceps
E-GEOD-25462	10/04/06	GSM624965.CEL	GSM624965.CEL	type 2 diabetes (DM2)		36 years	M	skeletal muscle	quadriceps
E-GEOD-25462	10/03/06	GSM624964.CEL	GSM624964.CEL	type 2 diabetes (DM2)		60 years	M	skeletal muscle	quadriceps
E-GEOD-25462	10/05/06	GSM624963.CEL	GSM624963.CEL	type 2 diabetes (DM2)		55 years	F	skeletal muscle	quadriceps
E-GEOD-25462	10/04/06	GSM624962.CEL	GSM624962.CEL	type 2 diabetes (DM2)		52 years	F	skeletal muscle	quadriceps
E-GEOD-25462	10/04/06	GSM624961.CEL	GSM624961.CEL	type 2 diabetes (DM2)		62 years	M	skeletal muscle	quadriceps
E-GEOD-25462	10/03/06	GSM624960.CEL	GSM624960.CEL	normal	first degree diabetes relatives	40 years	M	skeletal muscle	quadriceps	Family history diabetes positive - 2 parents
E-GEOD-25462	10/04/06	GSM624959.CEL	GSM624959.CEL	normal	first degree diabetes relatives	52 years	M	skeletal muscle	quadriceps	Family history diabetes positive - 2 parents
E-GEOD-25462	10/05/06	GSM624958.CEL	GSM624958.CEL	normal	first degree diabetes relatives	46 years	M	skeletal muscle	quadriceps	Family history diabetes positive - 2 parents
E-GEOD-25462	10/06/06	GSM624957.CEL	GSM624957.CEL	normal	first degree diabetes relatives	43 years	F	skeletal muscle	quadriceps	Family history diabetes positive - 2 parents
E-GEOD-25462	10/04/06	GSM624956.CEL	GSM624956.CEL	normal	first degree diabetes relatives	25 years	F	skeletal muscle	quadriceps	Family history diabetes positive - 2 parents
E-GEOD-25462	10/03/06	GSM624955.CEL	GSM624955.CEL	normal	first degree diabetes relatives	60 years	F	skeletal muscle	quadriceps	Family history diabetes positive - 2 parents
E-GEOD-25462	10/05/06	GSM624954.CEL	GSM624954.CEL	normal	first degree diabetes relatives	46 years	M	skeletal muscle	quadriceps	Family history diabetes positive - 2 parents
E-GEOD-25462	10/04/06	GSM624953.CEL	GSM624953.CEL	normal	first degree diabetes relatives	24 years	M	skeletal muscle	quadriceps	Family history diabetes positive - 2 parents
E-GEOD-25462	10/03/06	GSM624952.CEL	GSM624952.CEL	normal	first degree diabetes relatives	25 years	F	skeletal muscle	quadriceps	Family history diabetes positive - 2 parents
E-GEOD-25462	10/03/06	GSM624951.CEL	GSM624951.CEL	normal	first degree diabetes relatives	51 years	F	skeletal muscle	quadriceps	Family history diabetes positive - 1 parent
E-GEOD-25462	10/03/06	GSM624950.CEL	GSM624950.CEL	normal	first degree diabetes relatives	27 years	M	skeletal muscle	quadriceps	Family history diabetes positive - 1 parent
E-GEOD-25462	10/04/06	GSM624949.CEL	GSM624949.CEL	normal	first degree diabetes relatives	25 years	F	skeletal muscle	quadriceps	Family history diabetes positive - 1 parent
E-GEOD-25462	10/04/06	GSM624948.CEL	GSM624948.CEL	normal	first degree diabetes relatives	21 years	M	skeletal muscle	quadriceps	Family history diabetes positive - 1 parent
E-GEOD-25462	10/03/06	GSM624947.CEL	GSM624947.CEL	normal	first degree diabetes relatives	44 years	M	skeletal muscle	quadriceps	Family history diabetes positive - 1 parent
E-GEOD-25462	10/05/06	GSM624946.CEL	GSM624946.CEL	normal	first degree diabetes relatives	44 years	F	skeletal muscle	quadriceps	Family history diabetes positive - 1 parent
E-GEOD-25462	10/04/06	GSM624945.CEL	GSM624945.CEL	normal	first degree diabetes relatives	47 years	F	skeletal muscle	quadriceps	Family history diabetes positive - 1 parent
E-GEOD-25462	10/03/06	GSM624944.CEL	GSM624944.CEL	normal	first degree diabetes relatives	31 years	M	skeletal muscle	quadriceps	Family history diabetes positive - 1 parent
E-GEOD-25462	10/05/06	GSM624943.CEL	GSM624943.CEL	normal	first degree diabetes relatives	25 years	F	skeletal muscle	quadriceps	Family history diabetes positive - 1 parent
E-GEOD-25462	10/06/06	GSM624942.CEL	GSM624942.CEL	normal	first degree diabetes relatives	26 years	F	skeletal muscle	quadriceps	Family history diabetes positive - 1 parent
E-GEOD-25462	10/05/06	GSM624941.CEL	GSM624941.CEL	normal	first degree diabetes relatives	31 years	F	skeletal muscle	quadriceps	Family history diabetes positive - 1 parent
E-GEOD-25462	10/06/06	GSM624940.CEL	GSM624940.CEL	normal	first degree diabetes relatives	37 years	F	skeletal muscle	quadriceps	Family history diabetes positive - 1 parent
E-GEOD-25462	10/06/06	GSM624939.CEL	GSM624939.CEL	normal	first degree diabetes relatives	43 years	M	skeletal muscle	quadriceps	Family history diabetes positive - 1 parent
E-GEOD-25462	10/03/06	GSM624937.CEL	GSM624937.CEL	normal		24 years	F	skeletal muscle	quadriceps
E-GEOD-25462	10/06/06	GSM624936.CEL	GSM624936.CEL	normal		32 years	F	skeletal muscle	quadriceps
E-GEOD-25462	10/05/06	GSM624935.CEL	GSM624935.CEL	normal		24 years	F	skeletal muscle	quadriceps
E-GEOD-25462	10/06/06	GSM624934.CEL	GSM624934.CEL	normal		50 years	M	skeletal muscle	quadriceps
E-GEOD-25462	10/05/06	GSM624933.CEL	GSM624933.CEL	normal		38 years	M	skeletal muscle	quadriceps
E-GEOD-25462	10/04/06	GSM624932.CEL	GSM624932.CEL	normal		28 years	M	skeletal muscle	quadriceps
E-GEOD-25462	10/05/06	GSM624931.CEL	GSM624931.CEL	normal		46 years	F	skeletal muscle	quadriceps
E-GEOD-25462	10/06/06	GSM624930.CEL	GSM624930.CEL	normal		23 years	F	skeletal muscle	quadriceps
E-GEOD-25462	10/04/06	GSM624929.CEL	GSM624929.CEL	normal		57 years	F	skeletal muscle	quadriceps
E-GEOD-25462	10/04/06	GSM624928.CEL	GSM624928.CEL	normal		40 years	M	skeletal muscle	quadriceps
E-GEOD-25462	10/05/06	GSM624927.CEL	GSM624927.CEL	normal		42 years	F	skeletal muscle	quadriceps
E-GEOD-25462	10/03/06	GSM624926.CEL	GSM624926.CEL	normal		23 years	M	skeletal muscle	quadriceps
E-GEOD-25462	10/03/06	GSM624925.CEL	GSM624925.CEL	normal		39 years	F	skeletal muscle	quadriceps
E-GEOD-25941	04/29/09	GSM637548.CEL	GSM637548.CEL	normal		78 years	M	skeletal muscle	quadriceps
E-GEOD-25941	04/29/09	GSM637547.CEL	GSM637547.CEL	normal		78 years	M	skeletal muscle	quadriceps
E-GEOD-25941	04/29/09	GSM637546.CEL	GSM637546.CEL	normal		78 years	F	skeletal muscle	quadriceps
E-GEOD-25941	04/29/09	GSM637545.CEL	GSM637545.CEL	normal		78 years	M	skeletal muscle	quadriceps
E-GEOD-25941	04/29/09	GSM637544.CEL	GSM637544.CEL	normal		78 years	M	skeletal muscle	quadriceps
E-GEOD-25941	04/29/09	GSM637543.CEL	GSM637543.CEL	normal		78 years	M	skeletal muscle	quadriceps
E-GEOD-25941	04/29/09	GSM637542.CEL	GSM637542.CEL	normal		78 years	M	skeletal muscle	quadriceps
E-GEOD-25941	04/29/09	GSM637541.CEL	GSM637541.CEL	normal		78 years	M	skeletal muscle	quadriceps
E-GEOD-25941	04/29/09	GSM637540.CEL	GSM637540.CEL	normal		78 years	M	skeletal muscle	quadriceps
E-GEOD-25941	04/29/09	GSM637539.CEL	GSM637539.CEL	normal		78 years	M	skeletal muscle	quadriceps
E-GEOD-25941	04/29/09	GSM637538.CEL	GSM637538.CEL	normal		25 years	M	skeletal muscle	quadriceps
E-GEOD-25941	04/29/09	GSM637537.CEL	GSM637537.CEL	normal		25 years	M	skeletal muscle	quadriceps
E-GEOD-25941	04/29/09	GSM637536.CEL	GSM637536.CEL	normal		25 years	M	skeletal muscle	quadriceps
E-GEOD-25941	04/29/09	GSM637535.CEL	GSM637535.CEL	normal		25 years	M	skeletal muscle	quadriceps
E-GEOD-25941	04/29/09	GSM637534.CEL	GSM637534.CEL	normal		25 years	M	skeletal muscle	quadriceps
E-GEOD-25941	04/29/09	GSM637533.CEL	GSM637533.CEL	normal		25 years	M	skeletal muscle	quadriceps
E-GEOD-25941	04/29/09	GSM637532.CEL	GSM637532.CEL	normal		25 years	M	skeletal muscle	quadriceps
E-GEOD-25941	04/29/09	GSM637531.CEL	GSM637531.CEL	normal		78 years	F	skeletal muscle	quadriceps
E-GEOD-25941	04/29/09	GSM637530.CEL	GSM637530.CEL	normal		78 years	F	skeletal muscle	quadriceps
E-GEOD-25941	04/29/09	GSM637529.CEL	GSM637529.CEL	normal		78 years	F	skeletal muscle	quadriceps
E-GEOD-25941	04/29/09	GSM637528.CEL	GSM637528.CEL	normal		78 years	F	skeletal muscle	quadriceps
E-GEOD-25941	04/29/09	GSM637527.CEL	GSM637527.CEL	normal		78 years	F	skeletal muscle	quadriceps
E-GEOD-25941	04/29/09	GSM637526.CEL	GSM637526.CEL	normal		78 years	F	skeletal muscle	quadriceps
E-GEOD-25941	04/29/09	GSM637525.CEL	GSM637525.CEL	normal		78 years	F	skeletal muscle	quadriceps
E-GEOD-25941	04/29/09	GSM637524.CEL	GSM637524.CEL	normal		78 years	F	skeletal muscle	quadriceps
E-GEOD-25941	04/29/09	GSM637523.CEL	GSM637523.CEL	normal		78 years	F	skeletal muscle	quadriceps
E-GEOD-25941	04/29/09	GSM637522.CEL	GSM637522.CEL	normal		78 years	F	skeletal muscle	quadriceps
E-GEOD-25941	04/29/09	GSM637521.CEL	GSM637521.CEL	normal		78 years	F	skeletal muscle	quadriceps
E-GEOD-25941	04/29/09	GSM637520.CEL	GSM637520.CEL	normal		25 years	F	skeletal muscle	quadriceps
E-GEOD-25941	04/29/09	GSM637519.CEL	GSM637519.CEL	normal		25 years	F	skeletal muscle	quadriceps
E-GEOD-25941	04/29/09	GSM637518.CEL	GSM637518.CEL	normal		25 years	F	skeletal muscle	quadriceps
E-GEOD-25941	04/29/09	GSM637517.CEL	GSM637517.CEL	normal		25 years	F	skeletal muscle	quadriceps
E-GEOD-25941	04/29/09	GSM637516.CEL	GSM637516.CEL	normal		25 years	F	skeletal muscle	quadriceps
E-GEOD-25941	04/29/09	GSM637515.CEL	GSM637515.CEL	normal		25 years	F	skeletal muscle	quadriceps
E-GEOD-25941	04/29/09	GSM637514.CEL	GSM637514.CEL	normal		25 years	F	skeletal muscle	quadriceps
E-GEOD-25941	04/29/09	GSM637513.CEL	GSM637513.CEL	normal		25 years	F	skeletal muscle	quadriceps
E-GEOD-27536	09/17/08	GSM680082_WT_42_3.CEL	GSM680082_WT_42_3.CEL	Chronic Obstructive Pulmonary Disease	Trained	68 years	F	skeletal muscle	quadriceps	low BMI
E-GEOD-27536	09/17/08	GSM680081_WT_41_3.CEL	GSM680081_WT_41_3.CEL	Chronic Obstructive Pulmonary Disease	Trained	68 years	M	skeletal muscle	quadriceps	low BMI
E-GEOD-27536	09/17/08	GSM680080_WT_39_3.CEL	GSM680080_WT_39_3.CEL	Chronic Obstructive Pulmonary Disease	Trained	68 years	M	skeletal muscle	quadriceps	low BMI
E-GEOD-27536	09/17/08	GSM680079_WT_38_3.CEL	GSM680079_WT_38_3.CEL	Chronic Obstructive Pulmonary Disease	Trained	68 years	M	skeletal muscle	quadriceps	low BMI
E-GEOD-27536	09/17/08	GSM680078_WT_37_3.CEL	GSM680078_WT_37_3.CEL	Chronic Obstructive Pulmonary Disease	Trained	68 years	M	skeletal muscle	quadriceps	low BMI
E-GEOD-27536	09/16/08	GSM680077_WT_36_3.CEL	GSM680077_WT_36_3.CEL	Chronic Obstructive Pulmonary Disease	Trained	68 years	M	skeletal muscle	quadriceps	low BMI
E-GEOD-27536	09/26/08	GSM680076_WS_42_1.CEL	GSM680076_WS_42_1.CEL	Chronic Obstructive Pulmonary Disease	Sedentary	68 years	F	skeletal muscle	quadriceps	low BMI
E-GEOD-27536	09/26/08	GSM680075_WS_41_1.CEL	GSM680075_WS_41_1.CEL	Chronic Obstructive Pulmonary Disease	Sedentary	68 years	M	skeletal muscle	quadriceps	low BMI
E-GEOD-27536	09/26/08	GSM680074_WS_39_1.CEL	GSM680074_WS_39_1.CEL	Chronic Obstructive Pulmonary Disease	Sedentary	68 years	M	skeletal muscle	quadriceps	low BMI
E-GEOD-27536	09/26/08	GSM680073_WS_38_1.CEL	GSM680073_WS_38_1.CEL	Chronic Obstructive Pulmonary Disease	Sedentary	68 years	M	skeletal muscle	quadriceps	low BMI
E-GEOD-27536	09/26/08	GSM680072_WS_37_1.CEL	GSM680072_WS_37_1.CEL	Chronic Obstructive Pulmonary Disease	Sedentary	68 years	M	skeletal muscle	quadriceps	low BMI
E-GEOD-27536	10/03/08	GSM680071_WS_36_1.CEL	GSM680071_WS_36_1.CEL	Chronic Obstructive Pulmonary Disease	Sedentary	68 years	M	skeletal muscle	quadriceps	low BMI
E-GEOD-27536	09/16/08	GSM680070_NT_34_3.CEL	GSM680070_NT_34_3.CEL	Chronic Obstructive Pulmonary Disease	Trained	68 years	M	skeletal muscle	quadriceps
E-GEOD-27536	09/16/08	GSM680069_NT_30_3.CEL	GSM680069_NT_30_3.CEL	Chronic Obstructive Pulmonary Disease	Trained	68 years	M	skeletal muscle	quadriceps
E-GEOD-27536	09/16/08	GSM680068_NT_27_3.CEL	GSM680068_NT_27_3.CEL	Chronic Obstructive Pulmonary Disease	Trained	68 years	M	skeletal muscle	quadriceps
E-GEOD-27536	09/16/08	GSM680067_NT_25_3.CEL	GSM680067_NT_25_3.CEL	Chronic Obstructive Pulmonary Disease	Trained	68 years	M	skeletal muscle	quadriceps
E-GEOD-27536	09/16/08	GSM680066_NT_24_3.CEL	GSM680066_NT_24_3.CEL	Chronic Obstructive Pulmonary Disease	Trained	68 years	M	skeletal muscle	quadriceps
E-GEOD-27536	09/10/08	GSM680065_NT_22_3.CEL	GSM680065_NT_22_3.CEL	Chronic Obstructive Pulmonary Disease	Trained	68 years	M	skeletal muscle	quadriceps
E-GEOD-27536	09/10/08	GSM680064_NT_20_3.CEL	GSM680064_NT_20_3.CEL	Chronic Obstructive Pulmonary Disease	Trained	68 years	M	skeletal muscle	quadriceps
E-GEOD-27536	09/10/08	GSM680063_NT_18_3.CEL	GSM680063_NT_18_3.CEL	Chronic Obstructive Pulmonary Disease	Trained	68 years	M	skeletal muscle	quadriceps
E-GEOD-27536	09/10/08	GSM680062_NT_17_3.CEL	GSM680062_NT_17_3.CEL	Chronic Obstructive Pulmonary Disease	Trained	68 years	M	skeletal muscle	quadriceps
E-GEOD-27536	09/26/08	GSM680061_NS_34_1.CEL	GSM680061_NS_34_1.CEL	Chronic Obstructive Pulmonary Disease	Sedentary	68 years	M	skeletal muscle	quadriceps
E-GEOD-27536	09/23/08	GSM680060_NS_30_1.CEL	GSM680060_NS_30_1.CEL	Chronic Obstructive Pulmonary Disease	Sedentary	68 years	M	skeletal muscle	quadriceps
E-GEOD-27536	09/23/08	GSM680059_NS_27_1.CEL	GSM680059_NS_27_1.CEL	Chronic Obstructive Pulmonary Disease	Sedentary	68 years	M	skeletal muscle	quadriceps
E-GEOD-27536	09/23/08	GSM680058_NS_25_1.CEL	GSM680058_NS_25_1.CEL	Chronic Obstructive Pulmonary Disease	Sedentary	68 years	M	skeletal muscle	quadriceps
E-GEOD-27536	09/18/08	GSM680057_NS_24_1.CEL	GSM680057_NS_24_1.CEL	Chronic Obstructive Pulmonary Disease	Sedentary	68 years	M	skeletal muscle	quadriceps
E-GEOD-27536	09/18/08	GSM680056_NS_22_1.CEL	GSM680056_NS_22_1.CEL	Chronic Obstructive Pulmonary Disease	Sedentary	68 years	M	skeletal muscle	quadriceps
E-GEOD-27536	09/18/08	GSM680055_NS_20_1.CEL	GSM680055_NS_20_1.CEL	Chronic Obstructive Pulmonary Disease	Sedentary	68 years	M	skeletal muscle	quadriceps
E-GEOD-27536	09/18/08	GSM680054_NS_18_1.CEL	GSM680054_NS_18_1.CEL	Chronic Obstructive Pulmonary Disease	Sedentary	68 years	M	skeletal muscle	quadriceps
E-GEOD-27536	09/18/08	GSM680053_NS_17_1.CEL	GSM680053_NS_17_1.CEL	Chronic Obstructive Pulmonary Disease	Sedentary	68 years	M	skeletal muscle	quadriceps
E-GEOD-27536	09/05/08	GSM680052_CT_9_3.CEL	GSM680052_CT_9_3.CEL	normal	Trained	65 years	M	skeletal muscle	quadriceps
E-GEOD-27536	09/05/08	GSM680051_CT_8_3.CEL	GSM680051_CT_8_3.CEL	normal	Trained	65 years	M	skeletal muscle	quadriceps
E-GEOD-27536	09/05/08	GSM680050_CT_7_3.CEL	GSM680050_CT_7_3.CEL	normal	Trained	65 years	M	skeletal muscle	quadriceps
E-GEOD-27536	09/05/08	GSM680049_CT_5_3.CEL	GSM680049_CT_5_3.CEL	normal	Trained	65 years	M	skeletal muscle	quadriceps
E-GEOD-27536	09/05/08	GSM680048_CT_4_3.CEL	GSM680048_CT_4_3.CEL	normal	Trained	65 years	M	skeletal muscle	quadriceps
E-GEOD-27536	09/05/08	GSM680047_CT_2_3.CEL	GSM680047_CT_2_3.CEL	normal	Trained	65 years	M	skeletal muscle	quadriceps
E-GEOD-27536	09/10/08	GSM680046_CT_15_3.CEL	GSM680046_CT_15_3.CEL	normal	Trained	65 years	M	skeletal muscle	quadriceps
E-GEOD-27536	09/10/08	GSM680045_CT_13_3.CEL	GSM680045_CT_13_3.CEL	normal	Trained	65 years	M	skeletal muscle	quadriceps
E-GEOD-27536	09/10/08	GSM680044_CT_12_3.CEL	GSM680044_CT_12_3.CEL	normal	Trained	65 years	F	skeletal muscle	quadriceps
E-GEOD-27536	09/10/08	GSM680043_CT_11_3.CEL	GSM680043_CT_11_3.CEL	normal	Trained	65 years	M	skeletal muscle	quadriceps
E-GEOD-27536	09/05/08	GSM680042_CT_10_3.CEL	GSM680042_CT_10_3.CEL	normal	Trained	65 years	F	skeletal muscle	quadriceps
E-GEOD-27536	09/05/08	GSM680041_CT_1_3.CEL	GSM680041_CT_1_3.CEL	normal	Trained	65 years	M	skeletal muscle	quadriceps
E-GEOD-27536	09/18/08	GSM680040_CS_9_1.CEL	GSM680040_CS_9_1.CEL	normal	Sedentary	65 years	M	skeletal muscle	quadriceps
E-GEOD-27536	09/18/08	GSM680039_CS_8_1.CEL	GSM680039_CS_8_1.CEL	normal	Sedentary	65 years	M	skeletal muscle	quadriceps
E-GEOD-27536	10/03/08	GSM680038_CS_7_1.CEL	GSM680038_CS_7_1.CEL	normal	Sedentary	65 years	M	skeletal muscle	quadriceps
E-GEOD-27536	09/18/08	GSM680037_CS_5_1.CEL	GSM680037_CS_5_1.CEL	normal	Sedentary	65 years	M	skeletal muscle	quadriceps
E-GEOD-27536	09/17/08	GSM680036_CS_4_1.CEL	GSM680036_CS_4_1.CEL	normal	Sedentary	65 years	M	skeletal muscle	quadriceps
E-GEOD-27536	09/17/08	GSM680035_CS_2_1.CEL	GSM680035_CS_2_1.CEL	normal	Sedentary	65 years	M	skeletal muscle	quadriceps
E-GEOD-27536	09/18/08	GSM680034_CS_15_1.CEL	GSM680034_CS_15_1.CEL	normal	Sedentary	65 years	M	skeletal muscle	quadriceps
E-GEOD-27536	09/18/08	GSM680033_CS_13_1.CEL	GSM680033_CS_13_1.CEL	normal	Sedentary	65 years	M	skeletal muscle	quadriceps
E-GEOD-27536	09/18/08	GSM680032_CS_12_1.CEL	GSM680032_CS_12_1.CEL	normal	Sedentary	65 years	F	skeletal muscle	quadriceps
E-GEOD-27536	09/18/08	GSM680031_CS_11_1.CEL	GSM680031_CS_11_1.CEL	normal	Sedentary	65 years	M	skeletal muscle	quadriceps
E-GEOD-27536	09/18/08	GSM680030_CS_10_1.CEL	GSM680030_CS_10_1.CEL	normal	Sedentary	65 years	F	skeletal muscle	quadriceps
E-GEOD-27536	09/17/08	GSM680029_CS_1_1.CEL	GSM680029_CS_1_1.CEL	normal	Sedentary	65 years	M	skeletal muscle	quadriceps
E-GEOD-28422	01/09/09	GSM702466.CEL	GSM702466.CEL	normal	Trained	81 years	F	skeletal muscle	quadriceps	4hrs post resistant exercise
E-GEOD-28422	01/08/09	GSM702465.CEL	GSM702465.CEL	normal	Trained	81 years	F	skeletal muscle	quadriceps	4hrs post resistant exercise
E-GEOD-28422	01/08/09	GSM702464.CEL	GSM702464.CEL	normal	Trained	81 years	F	skeletal muscle	quadriceps	4hrs post resistant exercise
E-GEOD-28422	01/08/09	GSM702463.CEL	GSM702463.CEL	normal	Trained	81 years	F	skeletal muscle	quadriceps	4hrs post resistant exercise
E-GEOD-28422	01/07/09	GSM702462.CEL	GSM702462.CEL	normal	Trained	81 years	F	skeletal muscle	quadriceps	4hrs post resistant exercise
E-GEOD-28422	01/07/09	GSM702461.CEL	GSM702461.CEL	normal	Trained	81 years	F	skeletal muscle	quadriceps	4hrs post resistant exercise
E-GEOD-28422	01/09/09	GSM702460.CEL	GSM702460.CEL	normal	Trained	81 years	F	skeletal muscle	quadriceps
E-GEOD-28422	01/08/09	GSM702459.CEL	GSM702459.CEL	normal	Trained	81 years	F	skeletal muscle	quadriceps
E-GEOD-28422	01/08/09	GSM702458.CEL	GSM702458.CEL	normal	Trained	81 years	F	skeletal muscle	quadriceps
E-GEOD-28422	01/08/09	GSM702457.CEL	GSM702457.CEL	normal	Trained	81 years	F	skeletal muscle	quadriceps
E-GEOD-28422	01/07/09	GSM702456.CEL	GSM702456.CEL	normal	Trained	81 years	F	skeletal muscle	quadriceps
E-GEOD-28422	01/07/09	GSM702455.CEL	GSM702455.CEL	normal	Trained	81 years	F	skeletal muscle	quadriceps
E-GEOD-28422	01/09/09	GSM702454.CEL	GSM702454.CEL	normal	untrained	81 years	F	skeletal muscle	quadriceps	4hrs post resistant exercise
E-GEOD-28422	01/08/09	GSM702453.CEL	GSM702453.CEL	normal	untrained	81 years	F	skeletal muscle	quadriceps	4hrs post resistant exercise
E-GEOD-28422	01/08/09	GSM702452.CEL	GSM702452.CEL	normal	untrained	81 years	F	skeletal muscle	quadriceps	4hrs post resistant exercise
E-GEOD-28422	01/08/09	GSM702451.CEL	GSM702451.CEL	normal	untrained	81 years	F	skeletal muscle	quadriceps	4hrs post resistant exercise
E-GEOD-28422	01/07/09	GSM702450.CEL	GSM702450.CEL	normal	untrained	81 years	F	skeletal muscle	quadriceps	4hrs post resistant exercise
E-GEOD-28422	01/07/09	GSM702449.CEL	GSM702449.CEL	normal	untrained	81 years	F	skeletal muscle	quadriceps	4hrs post resistant exercise
E-GEOD-28422	01/09/09	GSM702448.CEL	GSM702448.CEL	normal	untrained	81 years	F	skeletal muscle	quadriceps
E-GEOD-28422	01/08/09	GSM702447.CEL	GSM702447.CEL	normal	untrained	81 years	F	skeletal muscle	quadriceps
E-GEOD-28422	01/08/09	GSM702446.CEL	GSM702446.CEL	normal	untrained	81 years	F	skeletal muscle	quadriceps
E-GEOD-28422	01/08/09	GSM702445.CEL	GSM702445.CEL	normal	untrained	81 years	F	skeletal muscle	quadriceps
E-GEOD-28422	01/07/09	GSM702444.CEL	GSM702444.CEL	normal	untrained	81 years	F	skeletal muscle	quadriceps
E-GEOD-28422	01/07/09	GSM702443.CEL	GSM702443.CEL	normal	untrained	81 years	F	skeletal muscle	quadriceps
E-GEOD-28422	01/09/09	GSM702441.CEL	GSM702441.CEL	normal	Trained	25 years	F	skeletal muscle	quadriceps	4hrs post resistant exercise
E-GEOD-28422	01/09/09	GSM702440.CEL	GSM702440.CEL	normal	Trained	25 years	F	skeletal muscle	quadriceps	4hrs post resistant exercise
E-GEOD-28422	01/08/09	GSM702439.CEL	GSM702439.CEL	normal	Trained	25 years	F	skeletal muscle	quadriceps	4hrs post resistant exercise
E-GEOD-28422	01/07/09	GSM702437.CEL	GSM702437.CEL	normal	Trained	25 years	F	skeletal muscle	quadriceps	4hrs post resistant exercise
E-GEOD-28422	01/07/09	GSM702436.CEL	GSM702436.CEL	normal	Trained	25 years	F	skeletal muscle	quadriceps	4hrs post resistant exercise
E-GEOD-28422	01/09/09	GSM702435.CEL	GSM702435.CEL	normal	Trained	25 years	F	skeletal muscle	quadriceps	4hrs post resistant exercise
E-GEOD-28422	01/09/09	GSM702434.CEL	GSM702434.CEL	normal	Trained	25 years	F	skeletal muscle	quadriceps
E-GEOD-28422	01/09/09	GSM702433.CEL	GSM702433.CEL	normal	Trained	25 years	F	skeletal muscle	quadriceps
E-GEOD-28422	01/09/09	GSM702432.CEL	GSM702432.CEL	normal	Trained	25 years	F	skeletal muscle	quadriceps
E-GEOD-28422	01/08/09	GSM702431.CEL	GSM702431.CEL	normal	Trained	25 years	F	skeletal muscle	quadriceps
E-GEOD-28422	01/08/09	GSM702430.CEL	GSM702430.CEL	normal	Trained	25 years	F	skeletal muscle	quadriceps
E-GEOD-28422	01/07/09	GSM702429.CEL	GSM702429.CEL	normal	Trained	25 years	F	skeletal muscle	quadriceps
E-GEOD-28422	01/07/09	GSM702428.CEL	GSM702428.CEL	normal	Trained	25 years	F	skeletal muscle	quadriceps
E-GEOD-28422	01/09/09	GSM702427.CEL	GSM702427.CEL	normal	untrained	25 years	F	skeletal muscle	quadriceps	4hrs post resistant exercise
E-GEOD-28422	01/09/09	GSM702426.CEL	GSM702426.CEL	normal	untrained	25 years	F	skeletal muscle	quadriceps	4hrs post resistant exercise
E-GEOD-28422	01/09/09	GSM702425.CEL	GSM702425.CEL	normal	untrained	25 years	F	skeletal muscle	quadriceps	4hrs post resistant exercise
E-GEOD-28422	01/08/09	GSM702424.CEL	GSM702424.CEL	normal	untrained	25 years	F	skeletal muscle	quadriceps	4hrs post resistant exercise
E-GEOD-28422	01/08/09	GSM702423.CEL	GSM702423.CEL	normal	untrained	25 years	F	skeletal muscle	quadriceps	4hrs post resistant exercise
E-GEOD-28422	01/07/09	GSM702422.CEL	GSM702422.CEL	normal	untrained	25 years	F	skeletal muscle	quadriceps	4hrs post resistant exercise
E-GEOD-28422	01/07/09	GSM702421.CEL	GSM702421.CEL	normal	untrained	25 years	F	skeletal muscle	quadriceps	4hrs post resistant exercise
E-GEOD-28422	01/07/09	GSM702420.CEL	GSM702420.CEL	normal	untrained	25 years	F	skeletal muscle	quadriceps	4hrs post resistant exercise
E-GEOD-28422	01/09/09	GSM702419.CEL	GSM702419.CEL	normal	untrained	25 years	F	skeletal muscle	quadriceps
E-GEOD-28422	01/09/09	GSM702418.CEL	GSM702418.CEL	normal	untrained	25 years	F	skeletal muscle	quadriceps
E-GEOD-28422	01/09/09	GSM702417.CEL	GSM702417.CEL	normal	untrained	25 years	F	skeletal muscle	quadriceps
E-GEOD-28422	01/08/09	GSM702416.CEL	GSM702416.CEL	normal	untrained	25 years	F	skeletal muscle	quadriceps
E-GEOD-28422	01/07/09	GSM702415.CEL	GSM702415.CEL	normal	untrained	25 years	F	skeletal muscle	quadriceps
E-GEOD-28422	01/07/09	GSM702414.CEL	GSM702414.CEL	normal	untrained	25 years	F	skeletal muscle	quadriceps
E-GEOD-28422	01/07/09	GSM702413.CEL	GSM702413.CEL	normal	untrained	25 years	F	skeletal muscle	quadriceps
E-GEOD-28422	01/09/09	GSM702412.CEL	GSM702412.CEL	normal	Trained	81 years	M	skeletal muscle	quadriceps	4hrs post resistant exercise
E-GEOD-28422	01/08/09	GSM702411.CEL	GSM702411.CEL	normal	Trained	81 years	M	skeletal muscle	quadriceps	4hrs post resistant exercise
E-GEOD-28422	01/08/09	GSM702410.CEL	GSM702410.CEL	normal	Trained	81 years	M	skeletal muscle	quadriceps	4hrs post resistant exercise
E-GEOD-28422	01/08/09	GSM702409.CEL	GSM702409.CEL	normal	Trained	81 years	M	skeletal muscle	quadriceps	4hrs post resistant exercise
E-GEOD-28422	01/07/09	GSM702408.CEL	GSM702408.CEL	normal	Trained	81 years	M	skeletal muscle	quadriceps	4hrs post resistant exercise
E-GEOD-28422	01/07/09	GSM702407.CEL	GSM702407.CEL	normal	Trained	81 years	M	skeletal muscle	quadriceps	4hrs post resistant exercise
E-GEOD-28422	01/09/09	GSM702406.CEL	GSM702406.CEL	normal	Trained	81 years	M	skeletal muscle	quadriceps
E-GEOD-28422	01/08/09	GSM702405.CEL	GSM702405.CEL	normal	Trained	81 years	M	skeletal muscle	quadriceps
E-GEOD-28422	01/08/09	GSM702404.CEL	GSM702404.CEL	normal	Trained	81 years	M	skeletal muscle	quadriceps
E-GEOD-28422	01/08/09	GSM702403.CEL	GSM702403.CEL	normal	Trained	81 years	M	skeletal muscle	quadriceps
E-GEOD-28422	01/07/09	GSM702402.CEL	GSM702402.CEL	normal	Trained	81 years	M	skeletal muscle	quadriceps
E-GEOD-28422	01/07/09	GSM702401.CEL	GSM702401.CEL	normal	Trained	81 years	M	skeletal muscle	quadriceps
E-GEOD-28422	01/09/09	GSM702400.CEL	GSM702400.CEL	normal	untrained	81 years	M	skeletal muscle	quadriceps	4hrs post resistant exercise
E-GEOD-28422	01/08/09	GSM702399.CEL	GSM702399.CEL	normal	untrained	81 years	M	skeletal muscle	quadriceps	4hrs post resistant exercise
E-GEOD-28422	01/08/09	GSM702398.CEL	GSM702398.CEL	normal	untrained	81 years	M	skeletal muscle	quadriceps	4hrs post resistant exercise
E-GEOD-28422	01/07/09	GSM702397.CEL	GSM702397.CEL	normal	untrained	81 years	M	skeletal muscle	quadriceps	4hrs post resistant exercise
E-GEOD-28422	01/07/09	GSM702396.CEL	GSM702396.CEL	normal	untrained	81 years	M	skeletal muscle	quadriceps	4hrs post resistant exercise
E-GEOD-28422	01/07/09	GSM702395.CEL	GSM702395.CEL	normal	untrained	81 years	M	skeletal muscle	quadriceps	4hrs post resistant exercise
E-GEOD-28422	01/09/09	GSM702394.CEL	GSM702394.CEL	normal	untrained	81 years	M	skeletal muscle	quadriceps
E-GEOD-28422	01/08/09	GSM702393.CEL	GSM702393.CEL	normal	untrained	81 years	M	skeletal muscle	quadriceps
E-GEOD-28422	01/08/09	GSM702392.CEL	GSM702392.CEL	normal	untrained	81 years	M	skeletal muscle	quadriceps
E-GEOD-28422	01/07/09	GSM702391.CEL	GSM702391.CEL	normal	untrained	81 years	M	skeletal muscle	quadriceps
E-GEOD-28422	01/07/09	GSM702390.CEL	GSM702390.CEL	normal	untrained	81 years	M	skeletal muscle	quadriceps
E-GEOD-28422	01/07/09	GSM702389.CEL	GSM702389.CEL	normal	untrained	81 years	M	skeletal muscle	quadriceps
E-GEOD-28422	01/09/09	GSM702388.CEL	GSM702388.CEL	normal	Trained	25 years	M	skeletal muscle	quadriceps	4hrs post resistant exercise
E-GEOD-28422	01/09/09	GSM702387.CEL	GSM702387.CEL	normal	Trained	25 years	M	skeletal muscle	quadriceps	4hrs post resistant exercise
E-GEOD-28422	01/08/09	GSM702386.CEL	GSM702386.CEL	normal	Trained	25 years	M	skeletal muscle	quadriceps	4hrs post resistant exercise
E-GEOD-28422	01/08/09	GSM702385.CEL	GSM702385.CEL	normal	Trained	25 years	M	skeletal muscle	quadriceps	4hrs post resistant exercise
E-GEOD-28422	01/08/09	GSM702384.CEL	GSM702384.CEL	normal	Trained	25 years	M	skeletal muscle	quadriceps	4hrs post resistant exercise
E-GEOD-28422	01/07/09	GSM702383.CEL	GSM702383.CEL	normal	Trained	25 years	M	skeletal muscle	quadriceps	4hrs post resistant exercise
E-GEOD-28422	01/07/09	GSM702382.CEL	GSM702382.CEL	normal	Trained	25 years	M	skeletal muscle	quadriceps	4hrs post resistant exercise
E-GEOD-28422	01/07/09	GSM702381.CEL	GSM702381.CEL	normal	Trained	25 years	M	skeletal muscle	quadriceps	4hrs post resistant exercise
E-GEOD-28422	01/09/09	GSM702380.CEL	GSM702380.CEL	normal	Trained	25 years	M	skeletal muscle	quadriceps
E-GEOD-28422	01/09/09	GSM702379.CEL	GSM702379.CEL	normal	Trained	25 years	M	skeletal muscle	quadriceps
E-GEOD-28422	01/08/09	GSM702378.CEL	GSM702378.CEL	normal	Trained	25 years	M	skeletal muscle	quadriceps
E-GEOD-28422	01/08/09	GSM702377.CEL	GSM702377.CEL	normal	Trained	25 years	M	skeletal muscle	quadriceps
E-GEOD-28422	01/08/09	GSM702376.CEL	GSM702376.CEL	normal	Trained	25 years	M	skeletal muscle	quadriceps
E-GEOD-28422	01/07/09	GSM702375.CEL	GSM702375.CEL	normal	Trained	25 years	M	skeletal muscle	quadriceps
E-GEOD-28422	01/07/09	GSM702373.CEL	GSM702373.CEL	normal	Trained	25 years	M	skeletal muscle	quadriceps
E-GEOD-28422	01/09/09	GSM702372.CEL	GSM702372.CEL	normal	untrained	25 years	M	skeletal muscle	quadriceps	4hrs post resistant exercise
E-GEOD-28422	01/09/09	GSM702371.CEL	GSM702371.CEL	normal	untrained	25 years	M	skeletal muscle	quadriceps	4hrs post resistant exercise
E-GEOD-28422	01/08/09	GSM702370.CEL	GSM702370.CEL	normal	untrained	25 years	M	skeletal muscle	quadriceps	4hrs post resistant exercise
E-GEOD-28422	01/08/09	GSM702369.CEL	GSM702369.CEL	normal	untrained	25 years	M	skeletal muscle	quadriceps	4hrs post resistant exercise
E-GEOD-28422	01/08/09	GSM702368.CEL	GSM702368.CEL	normal	untrained	25 years	M	skeletal muscle	quadriceps	4hrs post resistant exercise
E-GEOD-28422	01/07/09	GSM702367.CEL	GSM702367.CEL	normal	untrained	25 years	M	skeletal muscle	quadriceps	4hrs post resistant exercise
E-GEOD-28422	01/07/09	GSM702366.CEL	GSM702366.CEL	normal	untrained	25 years	M	skeletal muscle	quadriceps	4hrs post resistant exercise
E-GEOD-28422	01/07/09	GSM702365.CEL	GSM702365.CEL	normal	untrained	25 years	M	skeletal muscle	quadriceps	4hrs post resistant exercise
E-GEOD-28422	01/09/09	GSM702364.CEL	GSM702364.CEL	normal	untrained	25 years	M	skeletal muscle	quadriceps
E-GEOD-28422	01/09/09	GSM702363.CEL	GSM702363.CEL	normal	untrained	25 years	M	skeletal muscle	quadriceps
E-GEOD-28422	01/08/09	GSM702362.CEL	GSM702362.CEL	normal	untrained	25 years	M	skeletal muscle	quadriceps
E-GEOD-28422	01/08/09	GSM702361.CEL	GSM702361.CEL	normal	untrained	25 years	M	skeletal muscle	quadriceps
E-GEOD-28422	01/08/09	GSM702360.CEL	GSM702360.CEL	normal	untrained	25 years	M	skeletal muscle	quadriceps
E-GEOD-28422	01/07/09	GSM702358.CEL	GSM702358.CEL	normal	untrained	25 years	M	skeletal muscle	quadriceps
E-GEOD-28422	01/07/09	GSM702357.CEL	GSM702357.CEL	normal	untrained	25 years	M	skeletal muscle	quadriceps
E-GEOD-28998	07/26/06	GSM718522.CEL	GSM718522.CEL	normal	Trained	23 years	M	skeletal muscle	biceps brachii	4hrs post resistant exercise
E-GEOD-28998	07/26/06	GSM718521.CEL	GSM718521.CEL	normal	untrained	23 years	M	skeletal muscle	biceps brachii	4hrs post resistant exercise
E-GEOD-28998	07/13/05	GSM718520.CEL	GSM718520.CEL	normal	Trained	23 years	M	skeletal muscle	biceps brachii	4hrs post resistant exercise
E-GEOD-28998	06/29/05	GSM718519.CEL	GSM718519.CEL	normal	Trained	23 years	M	skeletal muscle	biceps brachii	4hrs post resistant exercise
E-GEOD-28998	07/26/06	GSM718518.CEL	GSM718518.CEL	normal	untrained	23 years	M	skeletal muscle	biceps brachii	4hrs post resistant exercise
E-GEOD-28998	07/26/06	GSM718517.CEL	GSM718517.CEL	normal	Trained	23 years	M	skeletal muscle	biceps brachii	4hrs post resistant exercise
E-GEOD-28998	07/13/05	GSM718516.CEL	GSM718516.CEL	normal	untrained	23 years	M	skeletal muscle	biceps brachii	4hrs post resistant exercise
E-GEOD-28998	06/29/05	GSM718515.CEL	GSM718515.CEL	normal	untrained	23 years	M	skeletal muscle	biceps brachii	4hrs post resistant exercise
E-GEOD-28998	07/26/06	GSM718514.CEL	GSM718514.CEL	normal	untrained	24 years	F	skeletal muscle	biceps brachii	4hrs post resistant exercise
E-GEOD-28998	07/26/06	GSM718513.CEL	GSM718513.CEL	normal	untrained	24 years	F	skeletal muscle	biceps brachii	4hrs post resistant exercise
E-GEOD-28998	06/29/05	GSM718512.CEL	GSM718512.CEL	normal	untrained	24 years	F	skeletal muscle	biceps brachii	4hrs post resistant exercise
E-GEOD-28998	07/26/06	GSM718511.CEL	GSM718511.CEL	normal	Trained	24 years	F	skeletal muscle	biceps brachii	4hrs post resistant exercise
E-GEOD-28998	07/26/06	GSM718510.CEL	GSM718510.CEL	normal	Trained	24 years	F	skeletal muscle	biceps brachii	4hrs post resistant exercise
E-GEOD-28998	06/29/05	GSM718509.CEL	GSM718509.CEL	normal	Trained	24 years	F	skeletal muscle	biceps brachii	4hrs post resistant exercise
E-GEOD-29819	03/14/07	GSM739027.CEL	GSM739027.CEL	normal		64 years	F	heart	right ventricle
E-GEOD-29819	02/20/07	GSM739026.CEL	GSM739026.CEL	normal		64 years	F	heart	left ventricle
E-GEOD-29819	03/16/07	GSM739025.CEL	GSM739025.CEL	normal			M	heart	right ventricle
E-GEOD-29819	02/21/07	GSM739024.CEL	GSM739024.CEL	normal			M	heart	left ventricle
E-GEOD-29819	03/16/07	GSM739023.CEL	GSM739023.CEL	normal		50 years	M	heart	right ventricle
E-GEOD-29819	02/21/07	GSM739022.CEL	GSM739022.CEL	normal		50 years	M	heart	left ventricle
E-GEOD-29819	03/14/07	GSM739021.CEL	GSM739021.CEL	normal		61 years	M	heart	right ventricle
E-GEOD-29819	02/20/07	GSM739020.CEL	GSM739020.CEL	normal		61 years	M	heart	left ventricle
E-GEOD-29819	03/16/07	GSM739019.CEL	GSM739019.CEL	normal		23 years	F	heart	right ventricle
E-GEOD-29819	02/21/07	GSM739018.CEL	GSM739018.CEL	normal		23 years	F	heart	left ventricle
E-GEOD-29819	03/14/07	GSM739017.CEL	GSM739017.CEL	normal		28 years	M	heart	right ventricle
E-GEOD-29819	02/22/07	GSM739016.CEL	GSM739016.CEL	normal		28 years	M	heart	left ventricle
E-GEOD-29819	04/27/07	GSM739015.CEL	GSM739015.CEL	Dilated cardiomyopathy		57 years	M	heart	right ventricle
E-GEOD-29819	02/20/07	GSM739014.CEL	GSM739014.CEL	Dilated cardiomyopathy		57 years	M	heart	left ventricle
E-GEOD-29819	04/27/07	GSM739013.CEL	GSM739013.CEL	Dilated cardiomyopathy		59 years	M	heart	right ventricle
E-GEOD-29819	02/20/07	GSM739012.CEL	GSM739012.CEL	Dilated cardiomyopathy		59 years	M	heart	left ventricle
E-GEOD-29819	04/27/07	GSM739011.CEL	GSM739011.CEL	Dilated cardiomyopathy		66 years	M	heart	right ventricle
E-GEOD-29819	02/21/07	GSM739010.CEL	GSM739010.CEL	Dilated cardiomyopathy		66 years	M	heart	left ventricle
E-GEOD-29819	04/27/07	GSM739009.CEL	GSM739009.CEL	Dilated cardiomyopathy		57 years	F	heart	right ventricle
E-GEOD-29819	02/20/07	GSM739008.CEL	GSM739008.CEL	Dilated cardiomyopathy		57 years	F	heart	left ventricle
E-GEOD-29819	04/27/07	GSM739007.CEL	GSM739007.CEL	Dilated cardiomyopathy		61 years	F	heart	right ventricle
E-GEOD-29819	02/20/07	GSM739006.CEL	GSM739006.CEL	Dilated cardiomyopathy		61 years	F	heart	left ventricle
E-GEOD-29819	04/27/07	GSM739005.CEL	GSM739005.CEL	Dilated cardiomyopathy		57 years	F	heart	right ventricle
E-GEOD-29819	02/21/07	GSM739004.CEL	GSM739004.CEL	Dilated cardiomyopathy		57 years	F	heart	left ventricle
E-GEOD-29819	04/27/07	GSM739003.CEL	GSM739003.CEL	Dilated cardiomyopathy		46 years	F	heart	right ventricle
E-GEOD-29819	02/21/07	GSM739002.CEL	GSM739002.CEL	Dilated cardiomyopathy		46 years	F	heart	left ventricle
E-GEOD-29819	03/16/07	GSM739001.CEL	GSM739001.CEL	arrhythmogenic right ventricular cardiomyopathy		18 years	M	heart	right ventricle
E-GEOD-29819	03/16/07	GSM739000.CEL	GSM739000.CEL	arrhythmogenic right ventricular cardiomyopathy		18 years	M	heart	left ventricle
E-GEOD-29819	03/16/07	GSM738999.CEL	GSM738999.CEL	arrhythmogenic right ventricular cardiomyopathy		15 years	F	heart	right ventricle
E-GEOD-29819	03/16/07	GSM738998.CEL	GSM738998.CEL	arrhythmogenic right ventricular cardiomyopathy		15 years	F	heart	left ventricle
E-GEOD-29819	03/14/07	GSM738997.CEL	GSM738997.CEL	arrhythmogenic right ventricular cardiomyopathy		43 years	M	heart	right ventricle
E-GEOD-29819	03/14/07	GSM738996.CEL	GSM738996.CEL	arrhythmogenic right ventricular cardiomyopathy		43 years	M	heart	left ventricle
E-GEOD-29819	03/14/07	GSM738995.CEL	GSM738995.CEL	arrhythmogenic right ventricular cardiomyopathy		30 years	M	heart	right ventricle
E-GEOD-29819	03/14/07	GSM738994.CEL	GSM738994.CEL	arrhythmogenic right ventricular cardiomyopathy		30 years	M	heart	left ventricle
E-GEOD-29819	03/16/07	GSM738993.CEL	GSM738993.CEL	arrhythmogenic right ventricular cardiomyopathy		47 years	M	heart	right ventricle
E-GEOD-29819	03/16/07	GSM738992.CEL	GSM738992.CEL	arrhythmogenic right ventricular cardiomyopathy		47 years	M	heart	left ventricle
E-GEOD-29819	03/16/07	GSM738991.CEL	GSM738991.CEL	arrhythmogenic right ventricular cardiomyopathy		53 years	F	heart	right ventricle
E-GEOD-29819	03/16/07	GSM738990.CEL	GSM738990.CEL	arrhythmogenic right ventricular cardiomyopathy		53 years	F	heart	left ventricle
E-GEOD-30806	08/19/08	GSM764198.CEL	GSM764198.CEL	normal	IBMPFD unaffected first degree relative		F	skeletal muscle	quadriceps
E-GEOD-30806	08/19/08	GSM764197.CEL	GSM764197.CEL	normal	IBMPFD unaffected first degree relative		M	skeletal muscle	quadriceps
E-GEOD-30806	08/19/08	GSM764196.CEL	GSM764196.CEL	normal	IBMPFD unaffected first degree relative		F	skeletal muscle	quadriceps
E-GEOD-30806	08/19/08	GSM764195.CEL	GSM764195.CEL	Inclusion body myopathy associated with Paget disease of bone and frontotemporal dementia (IBMPFD)			F	skeletal muscle	quadriceps
E-GEOD-30806	08/19/08	GSM764194.CEL	GSM764194.CEL	Inclusion body myopathy associated with Paget disease of bone and frontotemporal dementia (IBMPFD)			M	skeletal muscle	quadriceps
E-GEOD-30806	08/19/08	GSM764193.CEL	GSM764193.CEL	Inclusion body myopathy associated with Paget disease of bone and frontotemporal dementia (IBMPFD)			M	skeletal muscle	quadriceps
E-GEOD-30806	08/19/08	GSM764192.CEL	GSM764192.CEL	Inclusion body myopathy associated with Paget disease of bone and frontotemporal dementia (IBMPFD)			F	skeletal muscle	quadriceps
E-GEOD-30806	08/19/08	GSM764191.CEL	GSM764191.CEL	Inclusion body myopathy associated with Paget disease of bone and frontotemporal dementia (IBMPFD)			F	skeletal muscle	quadriceps
E-GEOD-30806	08/19/08	GSM764190.CEL	GSM764190.CEL	Inclusion body myopathy associated with Paget disease of bone and frontotemporal dementia (IBMPFD)			M	skeletal muscle	quadriceps
E-GEOD-30806	08/19/08	GSM764189.CEL	GSM764189.CEL	Inclusion body myopathy associated with Paget disease of bone and frontotemporal dementia (IBMPFD)			F	skeletal muscle	quadriceps
E-GEOD-33846	10/02/08	GSM837762.CEL	GSM837762.CEL	normal			M	skeletal muscle	wna
E-GEOD-33846	09/19/08	GSM837755.CEL	GSM837755.CEL	normal			M	heart	wna
E-GEOD-34111	02/11/11	GSM842041.CEL	GSM842041.CEL	normal		48 years	M	skeletal muscle	quadriceps
E-GEOD-34111	02/11/11	GSM842040.CEL	GSM842040.CEL	normal		66 years	M	skeletal muscle	quadriceps
E-GEOD-34111	02/11/11	GSM842039.CEL	GSM842039.CEL	normal		66 years	M	skeletal muscle	quadriceps
E-GEOD-34111	02/11/11	GSM842038.CEL	GSM842038.CEL	normal		42 years	F	skeletal muscle	quadriceps
E-GEOD-34111	02/11/11	GSM842036.CEL	GSM842036.CEL	normal		51 years	M	skeletal muscle	quadriceps
E-GEOD-34111	02/11/11	GSM842035.CEL	GSM842035.CEL	Oesophagus cancer-free	cancer-free 8 month post-resection with stable weight	63 years	F	skeletal muscle	quadriceps
E-GEOD-34111	02/11/11	GSM842034.CEL	GSM842034.CEL	Gastric cancer-free	cancer-free 8 month post-resection with stable weight	60 years	M	skeletal muscle	quadriceps
E-GEOD-34111	02/11/11	GSM842033.CEL	GSM842033.CEL	pancreas cancer-free	cancer-free 8 month post-resection with stable weight	67 years	M	skeletal muscle	quadriceps
E-GEOD-34111	02/11/11	GSM842032.CEL	GSM842032.CEL	pancreas cancer-free	cancer-free 8 month post-resection with stable weight	59 years	M	skeletal muscle	quadriceps
E-GEOD-34111	02/11/11	GSM842031.CEL	GSM842031.CEL	pancreas cancer-free	cancer-free 8 month post-resection with stable weight	59 years	F	skeletal muscle	quadriceps
E-GEOD-34111	02/11/11	GSM842030.CEL	GSM842030.CEL	pancreas cancer-free	cancer-free 8 month post-resection with stable weight	70 years	M	skeletal muscle	quadriceps
E-GEOD-34111	02/11/11	GSM842029.CEL	GSM842029.CEL	Oesophagus cancer-free	cancer-free 8 month post-resection with stable weight	56 years	M	skeletal muscle	quadriceps
E-GEOD-34111	02/11/11	GSM842027.CEL	GSM842027.CEL	Oesophagus cancer-free	cancer-free 8 month post-resection with stable weight	61 years	M	skeletal muscle	quadriceps
E-GEOD-34111	02/11/11	GSM842026.CEL	GSM842026.CEL	Oesophagus cancer-free	cancer-free 8 month post-resection with stable weight	74 years	M	skeletal muscle	quadriceps
E-GEOD-34111		GSM842025.CEL	GSM842025.CEL	Oesophagus cancer-free	cancer-free 8 month post-resection with stable weight	82 years	M	skeletal muscle	quadriceps
E-GEOD-34111	02/10/11	GSM842023.CEL	GSM842023.CEL	Oesophagus cancer		63 years	F	skeletal muscle	quadriceps
E-GEOD-34111	02/10/11	GSM842021.CEL	GSM842021.CEL	pancreas cancer		67 years	M	skeletal muscle	quadriceps
E-GEOD-34111	02/10/11	GSM842020.CEL	GSM842020.CEL	pancreas cancer		59 years	M	skeletal muscle	quadriceps
E-GEOD-34111	02/10/11	GSM842019.CEL	GSM842019.CEL	pancreas cancer		59 years	F	skeletal muscle	quadriceps
E-GEOD-34111	02/10/11	GSM842016.CEL	GSM842016.CEL	Gastric cancer		58 years	M	skeletal muscle	quadriceps
E-GEOD-34111	02/10/11	GSM842015.CEL	GSM842015.CEL	Oesophagus cancer		61 years	M	skeletal muscle	quadriceps
E-GEOD-34111	02/10/11	GSM842013.CEL	GSM842013.CEL	Oesophagus cancer		82 years	M	skeletal muscle	quadriceps
E-GEOD-34111	02/11/11	GSM842012.CEL	GSM842012.CEL	Oesophagus cancer		80 years	M	skeletal muscle	quadriceps
E-GEOD-3526	01/06/04	GSM80656.CEL	GSM80656.CEL	normal	3 hours post-mortem	30 years	M	heart	atrium	caucasian
E-GEOD-3526	12/19/03	GSM80698.CEL	GSM80698.CEL	normal	3 hours post-mortem	25 years	M	heart	atrium	caucasian
E-GEOD-3526	01/06/04	GSM80655.CEL	GSM80655.CEL	normal	3 hours post-mortem	39 years	F	heart	atrium	caucasian
E-GEOD-3526	01/06/04	GSM80654.CEL	GSM80654.CEL	normal	3 hours post-mortem	38 years	M	heart	atrium	caucasian
E-GEOD-3526	01/06/04	GSM80658.CEL	GSM80658.CEL	normal	3 hours post-mortem	38 years	M	heart	left ventricle	caucasian
E-GEOD-3526	01/06/04	GSM80659.CEL	GSM80659.CEL	normal	3 hours post-mortem	39 years	F	heart	left ventricle	caucasian
E-GEOD-3526	01/06/04	GSM80657.CEL	GSM80657.CEL	normal	3 hours post-mortem	25 years	M	heart	left ventricle	caucasian
E-GEOD-3526	01/09/04	GSM80791.CEL	GSM80791.CEL	normal	3 hours post-mortem	39 years	F	skeletal muscle	wna	caucasian
E-GEOD-3526	01/09/04	GSM80792.CEL	GSM80792.CEL	normal	3 hours post-mortem	30 years	M	skeletal muscle	wna	caucasian
E-GEOD-3526	01/09/04	GSM80790.CEL	GSM80790.CEL	normal	3 hours post-mortem	38 years	M	skeletal muscle	wna	caucasian
E-GEOD-3526	02/25/04	GSM80844.CEL	GSM80844.CEL	normal	3 hours post-mortem	38 years	F	skeletal muscle	tongue	caucasian
E-GEOD-3526	02/25/04	GSM80845.CEL	GSM80845.CEL	normal	3 hours post-mortem	30 years	M	skeletal muscle	tongue	caucasian
E-GEOD-3526	02/25/04	GSM80843.CEL	GSM80843.CEL	normal	3 hours post-mortem	25 years	M	skeletal muscle	tongue	caucasian
E-GEOD-3526	01/10/04	GSM80842.CEL	GSM80842.CEL	normal	3 hours post-mortem	39 years	F	skeletal muscle	tongue	caucasian
E-GEOD-35661	01/25/06	GSM873167.CEL	GSM873167.CEL	normal	trained	22 years	M	skeletal muscle	quadriceps	after 6 weeks of endurance exercise
E-GEOD-35661	02/21/06	GSM873166.CEL	GSM873166.CEL	normal	trained	22 years	M	skeletal muscle	quadriceps	after 6 weeks of endurance exercise
E-GEOD-35661	01/25/06	GSM873165.CEL	GSM873165.CEL	normal	trained	22 years	M	skeletal muscle	quadriceps	after 6 weeks of endurance exercise
E-GEOD-35661	01/25/06	GSM873164.CEL	GSM873164.CEL	normal	trained	22 years	M	skeletal muscle	quadriceps	after 6 weeks of endurance exercise
E-GEOD-35661	01/25/06	GSM873163.CEL	GSM873163.CEL	normal	trained	22 years	M	skeletal muscle	quadriceps	after 6 weeks of endurance exercise
E-GEOD-35661	02/21/06	GSM873162.CEL	GSM873162.CEL	normal	trained	22 years	M	skeletal muscle	quadriceps	after 6 weeks of endurance exercise
E-GEOD-35661	01/25/06	GSM873161.CEL	GSM873161.CEL	normal	trained	22 years	M	skeletal muscle	quadriceps	after 6 weeks of endurance exercise
E-GEOD-35661	01/25/06	GSM873160.CEL	GSM873160.CEL	normal	trained	22 years	M	skeletal muscle	quadriceps	after 6 weeks of endurance exercise
E-GEOD-35661	01/25/06	GSM873159.CEL	GSM873159.CEL	normal	trained	22 years	M	skeletal muscle	quadriceps	after 6 weeks of endurance exercise
E-GEOD-35661	01/25/06	GSM873158.CEL	GSM873158.CEL	normal	trained	22 years	M	skeletal muscle	quadriceps	after 6 weeks of endurance exercise
E-GEOD-35661	01/25/06	GSM873157.CEL	GSM873157.CEL	normal	trained	22 years	M	skeletal muscle	quadriceps	after 6 weeks of endurance exercise
E-GEOD-35661	01/25/06	GSM873156.CEL	GSM873156.CEL	normal	trained	22 years	M	skeletal muscle	quadriceps	after 6 weeks of endurance exercise
E-GEOD-35661	02/21/06	GSM873155.CEL	GSM873155.CEL	normal	trained	22 years	M	skeletal muscle	quadriceps	after 6 weeks of endurance exercise
E-GEOD-35661	02/21/06	GSM873154.CEL	GSM873154.CEL	normal	trained	22 years	M	skeletal muscle	quadriceps	after 6 weeks of endurance exercise
E-GEOD-35661	02/21/06	GSM873153.CEL	GSM873153.CEL	normal	trained	22 years	M	skeletal muscle	quadriceps	after 6 weeks of endurance exercise
E-GEOD-35661	02/21/06	GSM873152.CEL	GSM873152.CEL	normal	trained	22 years	M	skeletal muscle	quadriceps	after 6 weeks of endurance exercise
E-GEOD-35661	02/21/06	GSM873151.CEL	GSM873151.CEL	normal	trained	22 years	M	skeletal muscle	quadriceps	after 6 weeks of endurance exercise
E-GEOD-35661	02/21/06	GSM873150.CEL	GSM873150.CEL	normal	trained	22 years	M	skeletal muscle	quadriceps	after 6 weeks of endurance exercise
E-GEOD-35661	02/21/06	GSM873149.CEL	GSM873149.CEL	normal	trained	22 years	M	skeletal muscle	quadriceps	after 6 weeks of endurance exercise
E-GEOD-35661	02/21/06	GSM873148.CEL	GSM873148.CEL	normal	trained	22 years	M	skeletal muscle	quadriceps	after 6 weeks of endurance exercise
E-GEOD-35661	02/21/06	GSM873147.CEL	GSM873147.CEL	normal	trained	22 years	M	skeletal muscle	quadriceps	after 6 weeks of endurance exercise
E-GEOD-35661	02/21/06	GSM873146.CEL	GSM873146.CEL	normal	trained	22 years	M	skeletal muscle	quadriceps	after 6 weeks of endurance exercise
E-GEOD-35661	01/25/06	GSM873145.CEL	GSM873145.CEL	normal	trained	22 years	M	skeletal muscle	quadriceps	after 6 weeks of endurance exercise
E-GEOD-35661	01/26/06	GSM873144.CEL	GSM873144.CEL	normal	trained	22 years	M	skeletal muscle	quadriceps	after 6 weeks of endurance exercise
E-GEOD-36098	10/18/11	GSM881047_2_D202_HG-U133_Plus_2_.CEL	GSM881047_2_D202_HG.U133_Plus_2_.CEL	normal			M	mesoangioblast cells	quadriceps
E-GEOD-36098	10/18/11	GSM881046_1_D201_HG-U133_Plus_2_.CEL	GSM881046_1_D201_HG.U133_Plus_2_.CEL	normal			M	mesoangioblast cells	quadriceps
E-GEOD-36098	10/18/11	GSM881045_D_203_HG-U133_Plus_2_.CEL	GSM881045_D_203_HG.U133_Plus_2_.CEL	normal			M	mesoangioblast cells	quadriceps
E-GEOD-36098	10/18/11	GSM881044_8_MSTA_HG-U133_Plus_2_.CEL	GSM881044_8_MSTA_HG.U133_Plus_2_.CEL	limb-girdle muscular dystrophy 2D (LGMD2D)			M	human induced pluripotent stem cell-derived mesoangioblast (HIDEMs)	quadriceps
E-GEOD-36098	10/18/11	GSM881043_9_VF_HG-U133_Plus_2_.CEL	GSM881043_9_VF_HG.U133_Plus_2_.CEL	normal			F	human induced pluripotent stem cell-derived mesoangioblast (HIDEMs)		HIDEMs derived from commercial WT Viral Integration-Free episomal human iPSCs (Gibco; A1377)
E-GEOD-36098	10/18/11	GSM881042_7_H1_HG-U133_Plus_2_.CEL	GSM881042_7_H1_HG.U133_Plus_2_.CEL	normal			F	human induced pluripotent stem cell-derived mesoangioblast (HIDEMs)		HIDEMs derived from iPSCs generated from WT IMR90 fibroblasts
E-GEOD-36098	10/18/11	GSM881041_4_401_HG-U133_Plus_2_.CEL	GSM881041_4_401_HG.U133_Plus_2_.CEL	normal			M	human induced pluripotent stem cell-derived mesoangioblast (HIDEMs)		HIDEMs derived from iPSCs generated from WT skeletal muscle-derived cells
E-GEOD-36098	10/18/11	GSM881040_6_9E_HG-U133_Plus_2_.CEL	GSM881040_6_9E_HG.U133_Plus_2_.CEL	limb-girdle muscular dystrophy 2D (LGMD2D)			F	human induced pluripotent stem cell-derived mesoangioblast (HIDEMs)	quadriceps
E-GEOD-36098	10/18/11	GSM881039_5_465_HG-U133_Plus_2_.CEL	GSM881039_5_465_HG.U133_Plus_2_.CEL	limb-girdle muscular dystrophy 2D (LGMD2D)			M	human induced pluripotent stem cell-derived mesoangioblast (HIDEMs)	tibialis anterior
E-GEOD-38161	06/12/08	GSM936072_CC19B.CEL	GSM936072_CC19B.CEL	cyanotic Tetralogy of Fallot congenital heart disease	Post corrective surgery using hyperoxic/standard cardiopulmonary bypass		M	heart	right ventricle
E-GEOD-38161	06/12/08	GSM936071_CC15B.CEL	GSM936071_CC15B.CEL	cyanotic Tetralogy of Fallot congenital heart disease	Post corrective surgery using hyperoxic/standard cardiopulmonary bypass		F	heart	right ventricle
E-GEOD-38161	07/20/06	GSM936070_CC6B.CEL	GSM936070_CC6B.CEL	cyanotic Tetralogy of Fallot congenital heart disease	Post corrective surgery using hyperoxic/standard cardiopulmonary bypass		M	heart	right ventricle
E-GEOD-38161	05/17/06	GSM936069_CC3B.CEL	GSM936069_CC3B.CEL	cyanotic Tetralogy of Fallot congenital heart disease	Post corrective surgery using hyperoxic/standard cardiopulmonary bypass		M	heart	right ventricle
E-GEOD-38161	05/17/06	GSM936068_CC1B.CEL	GSM936068_CC1B.CEL	cyanotic Tetralogy of Fallot congenital heart disease	Post corrective surgery using hyperoxic/standard cardiopulmonary bypass		M	heart	right ventricle
E-GEOD-38162	06/12/08	GSM936081_CC14B.CEL	GSM936081_CC14B.CEL	cyanotic Tetralogy of Fallot congenital heart disease	Post corrective surgery using conrolled reoxygenation cardiopulmonary bypass		M	heart	right ventricle
E-GEOD-38162	03/16/07	GSM936080_CC10B.CEL	GSM936080_CC10B.CEL	cyanotic Tetralogy of Fallot congenital heart disease	Post corrective surgery using conrolled reoxygenation cardiopulmonary bypass		M	heart	right ventricle
E-GEOD-38162	12/08/06	GSM936075_CC9B.CEL	GSM936075_CC9B.CEL	cyanotic Tetralogy of Fallot congenital heart disease	Post corrective surgery using conrolled reoxygenation cardiopulmonary bypass		F	heart	right ventricle
E-GEOD-38162	07/06/06	GSM936074_CC7B.CEL	GSM936074_CC7B.CEL	cyanotic Tetralogy of Fallot congenital heart disease	Post corrective surgery using conrolled reoxygenation cardiopulmonary bypass		F	heart	right ventricle
E-GEOD-38162	07/06/06	GSM936073_CC4B.CEL	GSM936073_CC4B.CEL	cyanotic Tetralogy of Fallot congenital heart disease	Post corrective surgery using conrolled reoxygenation cardiopulmonary bypass		M	heart	right ventricle
E-GEOD-38718	07/11/05	GSM948644_PGEF-Untrained_18_A60-1UP.CEL	GSM948644_PGEF.Untrained_18_A60.1UP.CEL	normal		73 years	M	skeletal muscle	biceps brachii
E-GEOD-38718	07/11/05	GSM948643_PGEF-Untrained_22_A60-1UP.CEL	GSM948643_PGEF.Untrained_22_A60.1UP.CEL	normal		73 years	M	skeletal muscle	biceps brachii
E-GEOD-38718	07/07/05	GSM948642_PGEF-Untrained_17_A60-1UP.CEL	GSM948642_PGEF.Untrained_17_A60.1UP.CEL	normal		73 years	M	skeletal muscle	biceps brachii
E-GEOD-38718	07/07/05	GSM948641_PGEF-Untrained_21_A60-1UP.CEL	GSM948641_PGEF.Untrained_21_A60.1UP.CEL	normal		73 years	M	skeletal muscle	biceps brachii
E-GEOD-38718	07/11/05	GSM948640_PGEF-Untrained_13_A60-1UP.CEL	GSM948640_PGEF.Untrained_13_A60.1UP.CEL	normal		71 years	F	skeletal muscle	biceps brachii
E-GEOD-38718	07/11/05	GSM948639_PGEF-Untrained_19_A60-1UP.CEL	GSM948639_PGEF.Untrained_19_A60.1UP.CEL	normal		71 years	F	skeletal muscle	biceps brachii
E-GEOD-38718	07/07/05	GSM948638_PGEF-Untrained_16_A60-1UP.CEL	GSM948638_PGEF.Untrained_16_A60.1UP.CEL	normal		71 years	F	skeletal muscle	biceps brachii
E-GEOD-38718	07/07/05	GSM948637_PGEF-Untrained_20_A60-1UP.CEL	GSM948637_PGEF.Untrained_20_A60.1UP.CEL	normal		71 years	F	skeletal muscle	biceps brachii
E-GEOD-38780	12/15/11	GSM949394_AA12_15_11_A8.CEL	GSM949394_AA12_15_11_A8.CEL	strabismus		6 years	F	skeletal muscle	Extraocular muscle	right Medial Rectus
E-GEOD-38780	08/26/11	GSM949393_AA8_26_11_E3.CEL	GSM949393_AA8_26_11_E3.CEL	strabismus		63 years	F	skeletal muscle	Extraocular muscle	left Medial Rectus
E-GEOD-38780	07/26/11	GSM949392_AA7_26_11_f1-R-strabismic.CEL	GSM949392_AA7_26_11_f1.R.strabismic.CEL	strabismus		9 years	M	skeletal muscle	Extraocular muscle	right Lateral Rectus
E-GEOD-38780	12/15/11	GSM949391_AA12_15_11_ALMR.CEL	GSM949391_AA12_15_11_ALMR.CEL	normal		17 years	M	skeletal muscle	Extraocular muscle	left Medial Rectus
E-GEOD-38780	08/26/11	GSM949390_AA8_26_11_DRMR.CEL	GSM949390_AA8_26_11_DRMR.CEL	normal		38 years	M	skeletal muscle	Extraocular muscle	right Medial Rectus
E-GEOD-38780	12/15/11	GSM949389_AA12_15_11_5RMRb.CEL	GSM949389_AA12_15_11_5RMRb.CEL	normal		6 years	F	skeletal muscle	Extraocular muscle	right Medial Rectus
E-GEOD-38780	07/26/11	GSM949388_AA7_26_11_5RMRa-control.CEL	GSM949388_AA7_26_11_5RMRa.control.CEL	normal		6 years	F	skeletal muscle	Extraocular muscle	right Medial Rectus
E-GEOD-39454	12/21/07	GSM969505_MA45_GEIM397.CEL	GSM969505_MA45_GEIM397.CEL	Inclusion body myositis IBM		77 years	M	skeletal muscle	biceps brachii
E-GEOD-39454	04/15/08	GSM969504_MA45_GEIM391.CEL	GSM969504_MA45_GEIM391.CEL	necrotizing myopathy NM		71 years	M	skeletal muscle	Quadriceps
E-GEOD-39454	12/21/07	GSM969503_MA45_GEIM389.CEL	GSM969503_MA45_GEIM389.CEL	Dermatomyositis DM (with perifascicular atrophy (PFA))		40 years	M	skeletal muscle	biceps brachii
E-GEOD-39454	08/30/07	GSM969501_MA45_GEIM383.CEL	GSM969501_MA45_GEIM383.CEL	Dermatomyositis DM (with perifascicular atrophy (PFA))		44 years	F	skeletal muscle	Deltoid
E-GEOD-39454	08/30/07	GSM969500_MA45_GEIM382.CEL	GSM969500_MA45_GEIM382.CEL	Dermatomyositis DM (with perifascicular atrophy (PFA))		30 years	F	skeletal muscle	Deltoid
E-GEOD-39454	08/30/07	GSM969499_MA45_GEIM380.CEL	GSM969499_MA45_GEIM380.CEL	Inclusion body myositis IBM		61 years	M	skeletal muscle	Quadriceps
E-GEOD-39454	08/30/07	GSM969498_MA45_GEIM377.CEL	GSM969498_MA45_GEIM377.CEL	Inclusion body myositis IBM		50 years	M	skeletal muscle	biceps brachii
E-GEOD-39454	08/30/07	GSM969497_MA45_GEIM376.CEL	GSM969497_MA45_GEIM376.CEL	Dermatomyositis DM		37 years	M	skeletal muscle	Deltoid
E-GEOD-39454	08/30/07	GSM969495_MA45_GEIM374.CEL	GSM969495_MA45_GEIM374.CEL	Inclusion body myositis IBM		47 years	F	skeletal muscle	Quadriceps
E-GEOD-39454	08/30/07	GSM969494_MA45_GEIM373.CEL	GSM969494_MA45_GEIM373.CEL	Inclusion body myositis IBM		80 years	F	skeletal muscle	Quadriceps
E-GEOD-39454	12/21/07	GSM969493_MA45_GEIM372.CEL	GSM969493_MA45_GEIM372.CEL	Inclusion body myositis IBM		61 years	M	skeletal muscle	Quadriceps
E-GEOD-39454	12/21/07	GSM969492_MA45_GEIM368.CEL	GSM969492_MA45_GEIM368.CEL	normal		61 years	F	skeletal muscle	Quadriceps
E-GEOD-39454	08/30/07	GSM969491_MA45_GEIM365.CEL	GSM969491_MA45_GEIM365.CEL	normal		41 years	M	skeletal muscle	biceps brachii
E-GEOD-39454	08/30/07	GSM969490_MA45_GEIM363.CEL	GSM969490_MA45_GEIM363.CEL	Inclusion body myositis IBM		79 years	F	skeletal muscle	biceps brachii
E-GEOD-39454	03/22/07	GSM969488_MA45_GEIM349.CEL	GSM969488_MA45_GEIM349.CEL	Dermatomyositis DM		28 years	F	skeletal muscle	biceps brachii
E-GEOD-39454	04/15/08	GSM969487_MA45_GEIM340.CEL	GSM969487_MA45_GEIM340.CEL	necrotizing myopathy NM		83 years	F	skeletal muscle	biceps brachii
E-GEOD-39454	08/30/07	GSM969486_MA45_GEIM335.CEL	GSM969486_MA45_GEIM335.CEL	Inclusion body myositis IBM		71 years	F	skeletal muscle	Quadriceps
E-GEOD-39454	04/15/08	GSM969485_MA45_GEIM331.CEL	GSM969485_MA45_GEIM331.CEL	Polymyositis PM		87 years	F	skeletal muscle	Deltoid
E-GEOD-39454	04/15/08	GSM969484_MA45_GEIM322.CEL	GSM969484_MA45_GEIM322.CEL	Polymyositis PM		58 years	F	skeletal muscle	biceps brachii
E-GEOD-39454	08/30/07	GSM969483_MA45_GEIM315.CEL	GSM969483_MA45_GEIM315.CEL	Dermatomyositis DM		39 years	F	skeletal muscle	biceps brachii
E-GEOD-39454	04/15/08	GSM969482_MA45_GEIM312.CEL	GSM969482_MA45_GEIM312.CEL	Polymyositis PM		76 years	F	skeletal muscle	biceps brachii
E-GEOD-39454	04/15/08	GSM969481_MA45_GEIM306.CEL	GSM969481_MA45_GEIM306.CEL	necrotizing myopathy NM		64 years	F	skeletal muscle	biceps brachii
E-GEOD-39454	09/12/07	GSM969480_MA45_GEIM272.CEL	GSM969480_MA45_GEIM272.CEL	Dermatomyositis DM (with perifascicular atrophy (PFA))		25 years	F	skeletal muscle	biceps brachii
E-GEOD-39454	04/15/08	GSM969479_MA45_GEIM174.CEL	GSM969479_MA45_GEIM174.CEL	Polymyositis PM		36 years	F	skeletal muscle	biceps brachii
E-GEOD-39454	04/15/08	GSM969478_MA45_GEIM133.CEL	GSM969478_MA45_GEIM133.CEL	normal		60 years	F	skeletal muscle	Quadriceps
E-GEOD-39454	09/12/07	GSM969477_MA45_GEIM127.CEL	GSM969477_MA45_GEIM127.CEL	Inclusion body myositis IBM		68 years	F	skeletal muscle	biceps brachii
E-GEOD-39454	04/15/08	GSM969476_MA45_GEIM96.CEL	GSM969476_MA45_GEIM96.CEL	Polymyositis PM		86 years	F	skeletal muscle	biceps brachii
E-GEOD-39454	04/15/08	GSM969475_MA45_GEIM90.CEL	GSM969475_MA45_GEIM90.CEL	Polymyositis PM		90 years	M	skeletal muscle	Deltoid
E-GEOD-39454	04/15/08	GSM969474_MA45_GEIM64.CEL	GSM969474_MA45_GEIM64.CEL	necrotizing myopathy NM		77 years	M	skeletal muscle	biceps brachii
E-GEOD-39454	08/30/07	GSM969473_MA45_GEIM63.CEL	GSM969473_MA45_GEIM63.CEL	normal		37 years	F	skeletal muscle	biceps brachii
E-GEOD-39454	08/30/07	GSM969472_MA45_GEIM57.CEL	GSM969472_MA45_GEIM57.CEL	normal		38 years	F	skeletal muscle	biceps brachii
E-GEOD-39454	04/15/08	GSM969471_MA45_GEIM54.CEL	GSM969471_MA45_GEIM54.CEL	Polymyositis PM		62 years	M	skeletal muscle	Quadriceps
E-GEOD-39454	12/21/07	GSM969470_MA45_GEIM12.CEL	GSM969470_MA45_GEIM12.CEL	Dermatomyositis DM		74 years	F	skeletal muscle	biceps brachii
E-GEOD-40231	10/29/04	GSM988930_STAGE_8_SKLM.CEL	GSM988930_STAGE_8_SKLM.CEL	Coronary Artery Disease (CAD)	during coronary artery by-pass grafting		M	skeletal muscle	rectus abdominis
E-GEOD-40231	07/30/04	GSM988927_STAGE_7_SKLM.CEL	GSM988927_STAGE_7_SKLM.CEL	Coronary Artery Disease (CAD)	during coronary artery by-pass grafting		M	skeletal muscle	rectus abdominis
E-GEOD-40231	09/08/04	GSM988923_STAGE_66_SKLM.CEL	GSM988923_STAGE_66_SKLM.CEL	Coronary Artery Disease (CAD)	during coronary artery by-pass grafting		M	skeletal muscle	rectus abdominis
E-GEOD-40231	07/23/04	GSM988918_STAGE_65_SKLM.CEL	GSM988918_STAGE_65_SKLM.CEL	Coronary Artery Disease (CAD)	during coronary artery by-pass grafting		M	skeletal muscle	rectus abdominis
E-GEOD-40231	07/16/04	GSM988913_STAGE_64_SKLM.CEL	GSM988913_STAGE_64_SKLM.CEL	Coronary Artery Disease (CAD)	during coronary artery by-pass grafting		M	skeletal muscle	rectus abdominis
E-GEOD-40231	07/14/04	GSM988909_STAGE_63_SKLM.CEL	GSM988909_STAGE_63_SKLM.CEL	Coronary Artery Disease (CAD)	during coronary artery by-pass grafting		M	skeletal muscle	rectus abdominis
E-GEOD-40231	11/04/04	GSM988906_STAGE_62_SKLM.CEL	GSM988906_STAGE_62_SKLM.CEL	Coronary Artery Disease (CAD)	during coronary artery by-pass grafting		F	skeletal muscle	rectus abdominis
E-GEOD-40231	08/18/04	GSM988902_STAGE_61_SKLM.CEL	GSM988902_STAGE_61_SKLM.CEL	Coronary Artery Disease (CAD)	during coronary artery by-pass grafting		M	skeletal muscle	rectus abdominis
E-GEOD-40231	07/30/04	GSM988897_STAGE_60_SKLM.CEL	GSM988897_STAGE_60_SKLM.CEL	Coronary Artery Disease (CAD)	during coronary artery by-pass grafting		M	skeletal muscle	rectus abdominis
E-GEOD-40231	07/16/04	GSM988893_STAGE_6_SKLM.CEL	GSM988893_STAGE_6_SKLM.CEL	Coronary Artery Disease (CAD)	during coronary artery by-pass grafting		M	skeletal muscle	rectus abdominis
E-GEOD-40231	09/01/04	GSM988884_STAGE_58_SKLM.CEL	GSM988884_STAGE_58_SKLM.CEL	Coronary Artery Disease (CAD)	during coronary artery by-pass grafting		M	skeletal muscle	rectus abdominis
E-GEOD-40231	11/05/04	GSM988880_STAGE_57_SKLM.CEL	GSM988880_STAGE_57_SKLM.CEL	Coronary Artery Disease (CAD)	during coronary artery by-pass grafting		M	skeletal muscle	rectus abdominis
E-GEOD-40231	07/23/04	GSM988873_STAGE_55_SKLM.CEL	GSM988873_STAGE_55_SKLM.CEL	Coronary Artery Disease (CAD)	during coronary artery by-pass grafting		M	skeletal muscle	rectus abdominis
E-GEOD-40231	07/16/04	GSM988868_STAGE_54_SKLM.CEL	GSM988868_STAGE_54_SKLM.CEL	Coronary Artery Disease (CAD)	during coronary artery by-pass grafting		M	skeletal muscle	rectus abdominis
E-GEOD-40231	07/14/04	GSM988863_STAGE_53_SKLM.CEL	GSM988863_STAGE_53_SKLM.CEL	Coronary Artery Disease (CAD)	during coronary artery by-pass grafting		M	skeletal muscle	rectus abdominis
E-GEOD-40231	07/23/04	GSM988858_STAGE_52_SKLM.CEL	GSM988858_STAGE_52_SKLM.CEL	Coronary Artery Disease (CAD)	during coronary artery by-pass grafting		M	skeletal muscle	rectus abdominis
E-GEOD-40231	09/16/04	GSM988853_STAGE_51_SKLM.CEL	GSM988853_STAGE_51_SKLM.CEL	Coronary Artery Disease (CAD)	during coronary artery by-pass grafting		F	skeletal muscle	rectus abdominis
E-GEOD-40231	06/22/04	GSM988848_STAGE_50_SKLM.CEL	GSM988848_STAGE_50_SKLM.CEL	Coronary Artery Disease (CAD)	during coronary artery by-pass grafting		M	skeletal muscle	rectus abdominis
E-GEOD-40231	06/22/04	GSM988844_STAGE_5_SKLM.CEL	GSM988844_STAGE_5_SKLM.CEL	Coronary Artery Disease (CAD)	during coronary artery by-pass grafting		M	skeletal muscle	rectus abdominis
E-GEOD-40231	11/05/04	GSM988841_STAGE_49_SKLM.CEL	GSM988841_STAGE_49_SKLM.CEL	Coronary Artery Disease (CAD)	during coronary artery by-pass grafting		M	skeletal muscle	rectus abdominis
E-GEOD-40231	08/06/04	GSM988837_STAGE_48_SKLM.CEL	GSM988837_STAGE_48_SKLM.CEL	Coronary Artery Disease (CAD)	during coronary artery by-pass grafting		M	skeletal muscle	rectus abdominis
E-GEOD-40231	09/01/04	GSM988832_STAGE_47_SKLM.CEL	GSM988832_STAGE_47_SKLM.CEL	Coronary Artery Disease (CAD)	during coronary artery by-pass grafting		M	skeletal muscle	rectus abdominis
E-GEOD-40231	09/01/04	GSM988827_STAGE_46_SKLM.CEL	GSM988827_STAGE_46_SKLM.CEL	Coronary Artery Disease (CAD)	during coronary artery by-pass grafting		M	skeletal muscle	rectus abdominis
E-GEOD-40231	06/22/04	GSM988822_STAGE_45_SKLM.CEL	GSM988822_STAGE_45_SKLM.CEL	Coronary Artery Disease (CAD)	during coronary artery by-pass grafting		M	skeletal muscle	rectus abdominis
E-GEOD-40231	06/22/04	GSM988817_STAGE_44_SKLM.CEL	GSM988817_STAGE_44_SKLM.CEL	Coronary Artery Disease (CAD)	during coronary artery by-pass grafting		M	skeletal muscle	rectus abdominis
E-GEOD-40231	10/27/04	GSM988813_STAGE_43_SKLM.CEL	GSM988813_STAGE_43_SKLM.CEL	Coronary Artery Disease (CAD)	during coronary artery by-pass grafting		M	skeletal muscle	rectus abdominis
E-GEOD-40231	06/22/04	GSM988809_STAGE_42_SKLM.CEL	GSM988809_STAGE_42_SKLM.CEL	Coronary Artery Disease (CAD)	during coronary artery by-pass grafting		M	skeletal muscle	rectus abdominis
E-GEOD-40231	06/04/04	GSM988804_STAGE_41_SKLM.CEL	GSM988804_STAGE_41_SKLM.CEL	Coronary Artery Disease (CAD)	during coronary artery by-pass grafting		M	skeletal muscle	rectus abdominis
E-GEOD-40231	11/05/04	GSM988800_STAGE_40_SKLM.CEL	GSM988800_STAGE_40_SKLM.CEL	Coronary Artery Disease (CAD)	during coronary artery by-pass grafting		F	skeletal muscle	rectus abdominis
E-GEOD-40231	06/22/04	GSM988797_STAGE_4_SKLM.CEL	GSM988797_STAGE_4_SKLM.CEL	Coronary Artery Disease (CAD)	during coronary artery by-pass grafting		M	skeletal muscle	rectus abdominis
E-GEOD-40231	06/03/04	GSM988793_STAGE_39_SKLM.CEL	GSM988793_STAGE_39_SKLM.CEL	Coronary Artery Disease (CAD)	during coronary artery by-pass grafting		M	skeletal muscle	rectus abdominis
E-GEOD-40231	11/04/04	GSM988789_STAGE_38_SKLM.CEL	GSM988789_STAGE_38_SKLM.CEL	Coronary Artery Disease (CAD)	during coronary artery by-pass grafting		M	skeletal muscle	rectus abdominis
E-GEOD-40231	07/14/04	GSM988785_STAGE_37_SKLM.CEL	GSM988785_STAGE_37_SKLM.CEL	Coronary Artery Disease (CAD)	during coronary artery by-pass grafting		M	skeletal muscle	rectus abdominis
E-GEOD-40231	07/14/04	GSM988780_STAGE_36_SKLM.CEL	GSM988780_STAGE_36_SKLM.CEL	Coronary Artery Disease (CAD)	during coronary artery by-pass grafting		M	skeletal muscle	rectus abdominis
E-GEOD-40231	06/03/04	GSM988775_STAGE_35_SKLM.CEL	GSM988775_STAGE_35_SKLM.CEL	Coronary Artery Disease (CAD)	during coronary artery by-pass grafting		M	skeletal muscle	rectus abdominis
E-GEOD-40231	11/03/04	GSM988771_STAGE_34_SKLM.CEL	GSM988771_STAGE_34_SKLM.CEL	Coronary Artery Disease (CAD)	during coronary artery by-pass grafting		F	skeletal muscle	rectus abdominis
E-GEOD-40231	06/03/04	GSM988768_STAGE_33_SKLM.CEL	GSM988768_STAGE_33_SKLM.CEL	Coronary Artery Disease (CAD)	during coronary artery by-pass grafting		M	skeletal muscle	rectus abdominis
E-GEOD-40231	11/11/04	GSM988765_STAGE_32_SKLM.CEL	GSM988765_STAGE_32_SKLM.CEL	Coronary Artery Disease (CAD)	during coronary artery by-pass grafting		F	skeletal muscle	rectus abdominis
E-GEOD-40231	07/16/04	GSM988756_STAGE_3_SKLM.CEL	GSM988756_STAGE_3_SKLM.CEL	Coronary Artery Disease (CAD)	during coronary artery by-pass grafting		M	skeletal muscle	rectus abdominis
E-GEOD-40231	08/18/04	GSM988752_STAGE_29_SKLM.CEL	GSM988752_STAGE_29_SKLM.CEL	Coronary Artery Disease (CAD)	during coronary artery by-pass grafting		M	skeletal muscle	rectus abdominis
E-GEOD-40231	07/16/04	GSM988747_STAGE_28_SKLM.CEL	GSM988747_STAGE_28_SKLM.CEL	Coronary Artery Disease (CAD)	during coronary artery by-pass grafting		M	skeletal muscle	rectus abdominis
E-GEOD-40231	07/14/04	GSM988742_STAGE_27_SKLM.CEL	GSM988742_STAGE_27_SKLM.CEL	Coronary Artery Disease (CAD)	during coronary artery by-pass grafting		M	skeletal muscle	rectus abdominis
E-GEOD-40231	07/23/04	GSM988737_STAGE_26_SKLM.CEL	GSM988737_STAGE_26_SKLM.CEL	Coronary Artery Disease (CAD)	during coronary artery by-pass grafting		M	skeletal muscle	rectus abdominis
E-GEOD-40231	07/16/04	GSM988732_STAGE_25_SKLM.CEL	GSM988732_STAGE_25_SKLM.CEL	Coronary Artery Disease (CAD)	during coronary artery by-pass grafting		M	skeletal muscle	rectus abdominis
E-GEOD-40231	07/14/04	GSM988727_STAGE_24_SKLM.CEL	GSM988727_STAGE_24_SKLM.CEL	Coronary Artery Disease (CAD)	during coronary artery by-pass grafting		M	skeletal muscle	rectus abdominis
E-GEOD-40231	06/03/04	GSM988722_STAGE_23_SKLM.CEL	GSM988722_STAGE_23_SKLM.CEL	Coronary Artery Disease (CAD)	during coronary artery by-pass grafting		M	skeletal muscle	rectus abdominis
E-GEOD-40231	09/08/04	GSM988717_STAGE_22_SKLM.CEL	GSM988717_STAGE_22_SKLM.CEL	Coronary Artery Disease (CAD)	during coronary artery by-pass grafting		M	skeletal muscle	rectus abdominis
E-GEOD-40231	10/20/04	GSM988712_STAGE_21_SKLM.CEL	GSM988712_STAGE_21_SKLM.CEL	Coronary Artery Disease (CAD)	during coronary artery by-pass grafting		F	skeletal muscle	rectus abdominis
E-GEOD-40231	07/16/04	GSM988707_STAGE_20_SKLM.CEL	GSM988707_STAGE_20_SKLM.CEL	Coronary Artery Disease (CAD)	during coronary artery by-pass grafting		M	skeletal muscle	rectus abdominis
E-GEOD-40231	11/02/04	GSM988703_STAGE_2_SKLM.CEL	GSM988703_STAGE_2_SKLM.CEL	Coronary Artery Disease (CAD)	during coronary artery by-pass grafting		M	skeletal muscle	rectus abdominis
E-GEOD-40231	10/20/04	GSM988699_STAGE_19_SKLM.CEL	GSM988699_STAGE_19_SKLM.CEL	Coronary Artery Disease (CAD)	during coronary artery by-pass grafting		M	skeletal muscle	rectus abdominis
E-GEOD-40231	06/03/04	GSM988694_STAGE_18_SKLM.CEL	GSM988694_STAGE_18_SKLM.CEL	Coronary Artery Disease (CAD)	during coronary artery by-pass grafting		M	skeletal muscle	rectus abdominis
E-GEOD-40231	06/03/04	GSM988689_STAGE_17_SKLM.CEL	GSM988689_STAGE_17_SKLM.CEL	Coronary Artery Disease (CAD)	during coronary artery by-pass grafting		M	skeletal muscle	rectus abdominis
E-GEOD-40231	08/27/04	GSM988684_STAGE_16_SKLM.CEL	GSM988684_STAGE_16_SKLM.CEL	Coronary Artery Disease (CAD)	during coronary artery by-pass grafting		M	skeletal muscle	rectus abdominis
E-GEOD-40231	09/01/04	GSM988679_STAGE_15_SKLM.CEL	GSM988679_STAGE_15_SKLM.CEL	Coronary Artery Disease (CAD)	during coronary artery by-pass grafting		M	skeletal muscle	rectus abdominis
E-GEOD-40231	07/23/04	GSM988674_STAGE_14_SKLM.CEL	GSM988674_STAGE_14_SKLM.CEL	Coronary Artery Disease (CAD)	during coronary artery by-pass grafting		F	skeletal muscle	rectus abdominis
E-GEOD-40231	08/04/04	GSM988670_STAGE_13_SKLM.CEL	GSM988670_STAGE_13_SKLM.CEL	Coronary Artery Disease (CAD)	during coronary artery by-pass grafting		M	skeletal muscle	rectus abdominis
E-GEOD-40231	06/22/04	GSM988667_STAGE_12_SKLM.CEL	GSM988667_STAGE_12_SKLM.CEL	Coronary Artery Disease (CAD)	during coronary artery by-pass grafting		M	skeletal muscle	rectus abdominis
E-GEOD-40231	11/02/04	GSM988664_STAGE_11_SKLM.CEL	GSM988664_STAGE_11_SKLM.CEL	Coronary Artery Disease (CAD)	during coronary artery by-pass grafting		M	skeletal muscle	rectus abdominis
E-GEOD-40231	11/04/04	GSM988661_STAGE_10_SKLM.CEL	GSM988661_STAGE_10_SKLM.CEL	Coronary Artery Disease (CAD)	during coronary artery by-pass grafting		M	skeletal muscle	rectus abdominis
E-GEOD-40231	11/02/04	GSM988658_STAGE_1_SKLM.CEL	GSM988658_STAGE_1_SKLM.CEL	Coronary Artery Disease (CAD)	during coronary artery by-pass grafting		M	skeletal muscle	rectus abdominis
E-GEOD-41168	03/28/11	GSM1009889_ct_887_56B.CEL	GSM1009889_ct_887_56B.CEL	resveratrol for 12 weeks			F	skeletal muscle	quadriceps
E-GEOD-41168	03/28/11	GSM1009885_ct_882_52B.CEL	GSM1009885_ct_882_52B.CEL	calorie restrictive for 12 weeks			F	skeletal muscle	quadriceps
E-GEOD-41168	03/28/11	GSM1009881_ct_880_41B.CEL	GSM1009881_ct_880_41B.CEL	calorie restrictive for 12 weeks			F	skeletal muscle	quadriceps
E-GEOD-41168	03/28/11	GSM1009877_ct_878_40B.CEL	GSM1009877_ct_878_40B.CEL	placebo for 12 weeks			F	skeletal muscle	quadriceps
E-GEOD-41168	03/25/11	GSM1009871_ct_871_34B.CEL	GSM1009871_ct_871_34B.CEL	placebo for 12 weeks			F	skeletal muscle	quadriceps
E-GEOD-41168	03/25/11	GSM1009869_ct_869_31B.CEL	GSM1009869_ct_869_31B.CEL	calorie restrictive for 12 weeks			F	skeletal muscle	quadriceps
E-GEOD-41168	03/25/11	GSM1009865_ct_862_32B.CEL	GSM1009865_ct_862_32B.CEL	placebo for 12 weeks			F	skeletal muscle	quadriceps
E-GEOD-41168	03/25/11	GSM1009861_ct_860_28B.CEL	GSM1009861_ct_860_28B.CEL	calorie restrictive for 12 weeks			F	skeletal muscle	quadriceps
E-GEOD-41168	03/25/11	GSM1009857_ct_858_25B.CEL	GSM1009857_ct_858_25B.CEL	resveratrol for 12 weeks			F	skeletal muscle	quadriceps
E-GEOD-41168	03/24/11	GSM1009853_ct_850_23B.CEL	GSM1009853_ct_850_23B.CEL	placebo for 12 weeks			F	skeletal muscle	quadriceps
E-GEOD-41168	03/24/11	GSM1009851_ct_848_21B.CEL	GSM1009851_ct_848_21B.CEL	calorie restrictive for 12 weeks			F	skeletal muscle	quadriceps
E-GEOD-41168	03/24/11	GSM1009847_ct_846_19B.CEL	GSM1009847_ct_846_19B.CEL	resveratrol for 12 weeks			F	skeletal muscle	quadriceps
E-GEOD-41168	03/24/11	GSM1009843_ct_841_18B.CEL	GSM1009843_ct_841_18B.CEL	placebo for 12 weeks			F	skeletal muscle	quadriceps
E-GEOD-41168	03/24/11	GSM1009839_ct_839_13B.CEL	GSM1009839_ct_839_13B.CEL	resveratrol for 12 weeks			F	skeletal muscle	quadriceps
E-GEOD-41168	03/24/11	GSM1009835_ct_831_11B.CEL	GSM1009835_ct_831_11B.CEL	calorie restrictive for 12 weeks			F	skeletal muscle	quadriceps
E-GEOD-41168	03/24/11	GSM1009831_ct_829_10B.CEL	GSM1009831_ct_829_10B.CEL	resveratrol for 12 weeks			F	skeletal muscle	quadriceps
E-GEOD-41168	03/23/11	GSM1009827_ct_817_05B_HG-U133_Plus_2_.CEL	GSM1009827_ct_817_05B_HG.U133_Plus_2_.CEL	placebo for 12 weeks			F	skeletal muscle	quadriceps
E-GEOD-41168	03/23/11	GSM1009823_ct_819_07B_HG-U133_Plus_2_.CEL	GSM1009823_ct_819_07B_HG.U133_Plus_2_.CEL	resveratrol for 12 weeks			F	skeletal muscle	quadriceps
E-GEOD-41168	03/23/11	GSM1009819_ct_815_02B_HG-U133_Plus_2_.CEL	GSM1009819_ct_815_02B_HG.U133_Plus_2_.CEL	calorie restrictive for 12 weeks			F	skeletal muscle	quadriceps
E-GEOD-41168	03/28/11	GSM1009815_ct_884_51B.CEL	GSM1009815_ct_884_51B.CEL	resveratrol for 12 weeks			F	skeletal muscle	quadriceps
E-GEOD-41168	03/28/11	GSM1009809_ct_875_47B.CEL	GSM1009809_ct_875_47B.CEL	placebo for 12 weeks			F	skeletal muscle	quadriceps
E-GEOD-41168	03/28/11	GSM1009803_ct_873_45B.CEL	GSM1009803_ct_873_45B.CEL	calorie restrictive for 12 weeks			F	skeletal muscle	quadriceps
E-GEOD-41168	03/25/11	GSM1009799_ct_864_43B.CEL	GSM1009799_ct_864_43B.CEL	calorie restrictive for 12 weeks			F	skeletal muscle	quadriceps
E-GEOD-41168	03/25/11	GSM1009795_ct_866_46B.CEL	GSM1009795_ct_866_46B.CEL	placebo for 12 weeks			F	skeletal muscle	quadriceps
E-GEOD-41168	03/24/11	GSM1009793_ct_856_42B.CEL	GSM1009793_ct_856_42B.CEL	resveratrol for 12 weeks			F	skeletal muscle	quadriceps
E-GEOD-41168	03/24/11	GSM1009791_ct_854_38B.CEL	GSM1009791_ct_854_38B.CEL	calorie restrictive for 12 weeks			F	skeletal muscle	quadriceps
E-GEOD-41168	03/24/11	GSM1009787_ct_852_37B.CEL	GSM1009787_ct_852_37B.CEL	placebo for 12 weeks			F	skeletal muscle	quadriceps
E-GEOD-41168	03/24/11	GSM1009781_ct_843_35B.CEL	GSM1009781_ct_843_35B.CEL	calorie restrictive for 12 weeks			F	skeletal muscle	quadriceps
E-GEOD-41168	03/24/11	GSM1009775_ct_836_29B.CEL	GSM1009775_ct_836_29B.CEL	calorie restrictive for 12 weeks			F	skeletal muscle	quadriceps
E-GEOD-41168	03/24/11	GSM1009771_ct_833_22B.CEL	GSM1009771_ct_833_22B.CEL	placebo for 12 weeks			F	skeletal muscle	quadriceps
E-GEOD-41168	03/23/11	GSM1009767_ct_825_16B_HG-U133_Plus_2_.CEL	GSM1009767_ct_825_16B_HG.U133_Plus_2_.CEL	placebo for 12 weeks			F	skeletal muscle	quadriceps
E-GEOD-41168	03/23/11	GSM1009763_ct_821_14B_HG-U133_Plus_2_.CEL	GSM1009763_ct_821_14B_HG.U133_Plus_2_.CEL	resveratrol for 12 weeks			F	skeletal muscle	quadriceps
E-GEOD-41168	03/23/11	GSM1009759_ct_823_15B_HG-U133_Plus_2_.CEL	GSM1009759_ct_823_15B_HG.U133_Plus_2_.CEL	calorie restrictive for 12 weeks			F	skeletal muscle	quadriceps
E-GEOD-41168	03/23/11	GSM1009755_ct_813_09B_HG-U133_Plus_2_.CEL	GSM1009755_ct_813_09B_HG.U133_Plus_2_.CEL	placebo for 12 weeks			F	skeletal muscle	quadriceps
E-GEOD-41168	03/23/11	GSM1009751_ct_810_01B_HG-U133_Plus_2_.CEL	GSM1009751_ct_810_01B_HG.U133_Plus_2_.CEL	calorie restrictive for 12 weeks			F	skeletal muscle	quadriceps
E-GEOD-41168	03/28/11	GSM1009888_ct_886_56A.CEL	GSM1009888_ct_886_56A.CEL	normal			F	skeletal muscle	quadriceps
E-GEOD-41168	03/28/11	GSM1009884_ct_881_52A.CEL	GSM1009884_ct_881_52A.CEL	normal			F	skeletal muscle	quadriceps
E-GEOD-41168	03/28/11	GSM1009880_ct_879_41A.CEL	GSM1009880_ct_879_41A.CEL	normal			F	skeletal muscle	quadriceps
E-GEOD-41168	03/28/11	GSM1009876_ct_877_40A.CEL	GSM1009876_ct_877_40A.CEL	normal			F	skeletal muscle	quadriceps
E-GEOD-41168	03/25/11	GSM1009870_ct_870_34A.CEL	GSM1009870_ct_870_34A.CEL	normal			F	skeletal muscle	quadriceps
E-GEOD-41168	03/25/11	GSM1009868_ct_868_31A.CEL	GSM1009868_ct_868_31A.CEL	normal			F	skeletal muscle	quadriceps
E-GEOD-41168	03/25/11	GSM1009864_ct_861_32A.CEL	GSM1009864_ct_861_32A.CEL	normal			F	skeletal muscle	quadriceps
E-GEOD-41168	03/25/11	GSM1009860_ct_859_28A.CEL	GSM1009860_ct_859_28A.CEL	normal			F	skeletal muscle	quadriceps
E-GEOD-41168	03/25/11	GSM1009856_ct_857_25A.CEL	GSM1009856_ct_857_25A.CEL	normal			F	skeletal muscle	quadriceps
E-GEOD-41168	03/24/11	GSM1009852_ct_849_23A.CEL	GSM1009852_ct_849_23A.CEL	normal			F	skeletal muscle	quadriceps
E-GEOD-41168	03/24/11	GSM1009850_ct_847_21A.CEL	GSM1009850_ct_847_21A.CEL	normal			F	skeletal muscle	quadriceps
E-GEOD-41168	03/24/11	GSM1009846_ct_845_19A.CEL	GSM1009846_ct_845_19A.CEL	normal			F	skeletal muscle	quadriceps
E-GEOD-41168	03/24/11	GSM1009842_ct_840_18A.CEL	GSM1009842_ct_840_18A.CEL	normal			F	skeletal muscle	quadriceps
E-GEOD-41168	03/24/11	GSM1009838_ct_838_13A.CEL	GSM1009838_ct_838_13A.CEL	normal			F	skeletal muscle	quadriceps
E-GEOD-41168	03/24/11	GSM1009834_ct_830_11A.CEL	GSM1009834_ct_830_11A.CEL	normal			F	skeletal muscle	quadriceps
E-GEOD-41168	03/24/11	GSM1009830_ct_828_10A.CEL	GSM1009830_ct_828_10A.CEL	normal			F	skeletal muscle	quadriceps
E-GEOD-41168	03/23/11	GSM1009826_ct_816_05A_HG-U133_Plus_2_.CEL	GSM1009826_ct_816_05A_HG.U133_Plus_2_.CEL	normal			F	skeletal muscle	quadriceps
E-GEOD-41168	03/23/11	GSM1009822_ct_818_07A_HG-U133_Plus_2_.CEL	GSM1009822_ct_818_07A_HG.U133_Plus_2_.CEL	normal			F	skeletal muscle	quadriceps
E-GEOD-41168	03/23/11	GSM1009818_ct_814_02A_HG-U133_Plus_2_.CEL	GSM1009818_ct_814_02A_HG.U133_Plus_2_.CEL	normal			F	skeletal muscle	quadriceps
E-GEOD-41168	03/28/11	GSM1009814_ct_883_51A.CEL	GSM1009814_ct_883_51A.CEL	normal			F	skeletal muscle	quadriceps
E-GEOD-41168	03/28/11	GSM1009808_ct_874_47A.CEL	GSM1009808_ct_874_47A.CEL	normal			F	skeletal muscle	quadriceps
E-GEOD-41168	03/28/11	GSM1009802_ct_872_45A.CEL	GSM1009802_ct_872_45A.CEL	normal			F	skeletal muscle	quadriceps
E-GEOD-41168	03/25/11	GSM1009798_ct_863_43A.CEL	GSM1009798_ct_863_43A.CEL	normal			F	skeletal muscle	quadriceps
E-GEOD-41168	03/25/11	GSM1009794_ct_865_46A.CEL	GSM1009794_ct_865_46A.CEL	normal			F	skeletal muscle	quadriceps
E-GEOD-41168	03/24/11	GSM1009792_ct_855_42A.CEL	GSM1009792_ct_855_42A.CEL	normal			F	skeletal muscle	quadriceps
E-GEOD-41168	03/24/11	GSM1009790_ct_853_38A.CEL	GSM1009790_ct_853_38A.CEL	normal			F	skeletal muscle	quadriceps
E-GEOD-41168	03/24/11	GSM1009786_ct_851_37A.CEL	GSM1009786_ct_851_37A.CEL	normal			F	skeletal muscle	quadriceps
E-GEOD-41168	03/24/11	GSM1009780_ct_842_35A.CEL	GSM1009780_ct_842_35A.CEL	normal			F	skeletal muscle	quadriceps
E-GEOD-41168	03/24/11	GSM1009774_ct_835_29A.CEL	GSM1009774_ct_835_29A.CEL	normal			F	skeletal muscle	quadriceps
E-GEOD-41168	03/24/11	GSM1009770_ct_832_22A.CEL	GSM1009770_ct_832_22A.CEL	normal			F	skeletal muscle	quadriceps
E-GEOD-41168	03/23/11	GSM1009766_ct_824_16A_HG-U133_Plus_2_.CEL	GSM1009766_ct_824_16A_HG.U133_Plus_2_.CEL	normal			F	skeletal muscle	quadriceps
E-GEOD-41168	03/23/11	GSM1009762_ct_820_14A_HG-U133_Plus_2_.CEL	GSM1009762_ct_820_14A_HG.U133_Plus_2_.CEL	normal			F	skeletal muscle	quadriceps
E-GEOD-41168	03/23/11	GSM1009758_ct_822_15A_HG-U133_Plus_2_.CEL	GSM1009758_ct_822_15A_HG.U133_Plus_2_.CEL	normal			F	skeletal muscle	quadriceps
E-GEOD-41168	03/23/11	GSM1009754_ct_812_09A_HG-U133_Plus_2_.CEL	GSM1009754_ct_812_09A_HG.U133_Plus_2_.CEL	normal			F	skeletal muscle	quadriceps
E-GEOD-41168	03/23/11	GSM1009750_ct_809_01A_HG-U133_Plus_2_.CEL	GSM1009750_ct_809_01A_HG.U133_Plus_2_.CEL	normal			F	skeletal muscle	quadriceps
E-GEOD-42806	04/01/09	GSM1050274_C5_control.CEL	GSM1050274_C5_control.CEL	normal		76 years	M	skeletal muscle	soleus
E-GEOD-42806	04/15/09	GSM1050273_C4_control.CEL	GSM1050273_C4_control.CEL	normal		80 years	M	skeletal muscle	extensor digitorum longus
E-GEOD-42806	04/15/09	GSM1050272_C3_control.CEL	GSM1050272_C3_control.CEL	normal		80 years	M	skeletal muscle	tibialis anterior
E-GEOD-42806	04/15/09	GSM1050271_C2_control.CEL	GSM1050271_C2_control.CEL	normal		76 years	M	skeletal muscle	extensor digitorum longus
E-GEOD-42806	04/15/09	GSM1050270_C1_control.CEL	GSM1050270_C1_control.CEL	normal		76 years	M	skeletal muscle	tibialis posterior
E-GEOD-42806	06/01/07	GSM1050266_T7_TMD.CEL	GSM1050266_T7_TMD.CEL	tibial muscular dystrophy (TMD)		52 years	M	skeletal muscle	tibialis anterior
E-GEOD-42806	06/01/07	GSM1050265_T6_TMD.CEL	GSM1050265_T6_TMD.CEL	tibial muscular dystrophy (TMD)		52 years	M	skeletal muscle	tibialis posterior
E-GEOD-42806	06/01/07	GSM1050264_T5_TMD.CEL	GSM1050264_T5_TMD.CEL	tibial muscular dystrophy (TMD)		52 years	M	skeletal muscle	soleus
E-GEOD-42806	06/04/07	GSM1050263_T4_TMD.CEL	GSM1050263_T4_TMD.CEL	tibial muscular dystrophy (TMD)		65 years	M	skeletal muscle	extensor digitorum longus
E-GEOD-42806	06/01/07	GSM1050262_T3_TMD.CEL	GSM1050262_T3_TMD.CEL	tibial muscular dystrophy (TMD)		48 years	M	skeletal muscle	tibialis anterior
E-GEOD-42806	06/01/07	GSM1050261_T2_TMD.CEL	GSM1050261_T2_TMD.CEL	tibial muscular dystrophy (TMD)		62 years	M	skeletal muscle	gastrocnemius
E-GEOD-42806	06/04/07	GSM1050260_T1_TMD.CEL	GSM1050260_T1_TMD.CEL	tibial muscular dystrophy (TMD)		53 years	M	skeletal muscle	extensor digitorum longus
E-GEOD-43346	08/05/05	GSM1060734_Heart_U133p2.CEL	GSM1060734_Heart_U133p2.CEL	normal			M	heart	wna
E-GEOD-43346	08/05/05	GSM1060733_Skeletal_muscle_U133p2.CEL	GSM1060733_Skeletal_muscle_U133p2.CEL	normal			F	skeletal muscle	wna
E-GEOD-43437	02/29/08	GSM1062410_Subject_Y3.CEL	GSM1062410_Subject_Y3.CEL	Goserelin treatment	trained	21 years	M	skeletal muscle	quadriceps
E-GEOD-43437	02/29/08	GSM1062409_Subject_D3.CEL	GSM1062409_Subject_D3.CEL	Goserelin treatment	trained	28 years	M	skeletal muscle	quadriceps
E-GEOD-43437	02/29/08	GSM1062408_Subject_OE3.CEL	GSM1062408_Subject_OE3.CEL	Goserelin treatment	trained	31 years	M	skeletal muscle	quadriceps
E-GEOD-43437	02/29/08	GSM1062407_Subject_T3.CEL	GSM1062407_Subject_T3.CEL	Goserelin treatment	trained	22 years	M	skeletal muscle	quadriceps
E-GEOD-43437	02/29/08	GSM1062406_Subject_C3.CEL	GSM1062406_Subject_C3.CEL	Goserelin treatment	trained	25 years	M	skeletal muscle	quadriceps
E-GEOD-43437	02/29/08	GSM1062405_Subject_R3.CEL	GSM1062405_Subject_R3.CEL	placebo	trained	19 years	M	skeletal muscle	quadriceps
E-GEOD-43437	02/29/08	GSM1062404_Subject_O3.CEL	GSM1062404_Subject_O3.CEL	placebo	trained	26 years	M	skeletal muscle	quadriceps
E-GEOD-43437	02/29/08	GSM1062403_Subject_K3.CEL	GSM1062403_Subject_K3.CEL	placebo	trained	24 years	M	skeletal muscle	quadriceps
E-GEOD-43437	02/29/08	GSM1062402_Subject_B3.CEL	GSM1062402_Subject_B3.CEL	placebo	trained	24 years	M	skeletal muscle	quadriceps
E-GEOD-44227	09/25/12	GSM1080990_hMFA3.CEL	GSM1080990_hMFA3.CEL	unfractionated		fetus	F	human myofiber-associated cells (hMFA)
E-GEOD-44227	09/25/12	GSM1080989_hMFA2.CEL	GSM1080989_hMFA2.CEL	unfractionated		fetus	M	human myofiber-associated cells (hMFA)
E-GEOD-44227	09/25/12	GSM1080988_hMFA1.CEL	GSM1080988_hMFA1.CEL	unfractionated		fetus	M	human myofiber-associated cells (hMFA)
E-GEOD-44227	09/25/12	GSM1080987_hFAP3.CEL	GSM1080987_hFAP3.CEL	CD45-Mac1-GlyA-CD31-CD34+		fetus	M	CD34+ non-myogenic human myofiber-associated cells (CD34+)
E-GEOD-44227	09/25/12	GSM1080986_hFAP2.CEL	GSM1080986_hFAP2.CEL	CD45-Mac1-GlyA-CD31-CD34+		fetus	M	CD34+ non-myogenic human myofiber-associated cells (CD34+)
E-GEOD-44227	09/25/12	GSM1080985_hFAP1.CEL	GSM1080985_hFAP1.CEL	CD45-Mac1-GlyA-CD31-CD34+		fetus	M	CD34+ non-myogenic human myofiber-associated cells (CD34+)
E-GEOD-44227	09/25/12	GSM1080984_hSMP4.CEL	GSM1080984_hSMP4.CEL	CD45-Mac1-GlyA-CD31-CD34-CD56intITGA7hi		fetus	M	human skeletal muscle precursor cells (hSMP)
E-GEOD-44227	09/25/12	GSM1080983_hSMP3.CEL	GSM1080983_hSMP3.CEL	CD45-Mac1-GlyA-CD31-CD34-CD56intITGA7hi		fetus	M	human skeletal muscle precursor cells (hSMP)
E-GEOD-44227	09/25/12	GSM1080982_hSMP2.CEL	GSM1080982_hSMP2.CEL	CD45-Mac1-GlyA-CD31-CD34-CD56intITGA7hi		fetus	M	human skeletal muscle precursor cells (hSMP)
E-GEOD-44227	09/25/12	GSM1080981_hSMP1.CEL	GSM1080981_hSMP1.CEL	CD45-Mac1-GlyA-CD31-CD34-CD56intITGA7hi		fetus	F	human skeletal muscle precursor cells (hSMP)
E-GEOD-45426	02/07/08	GSM1104126_S45.CEL	GSM1104126_S45.CEL	normal	resistance exercise (2 bouts)	22 years	M	skeletal muscle	quadriceps	2 sessions of 5 × 30 maximum isokinetic knee extensions (180°/s) separated by 48 h
E-GEOD-45426	02/07/08	GSM1104125_S44.CEL	GSM1104125_S44.CEL	normal	resistance exercise (1 bout)	22 years	M	skeletal muscle	quadriceps	5 × 30 maximum isokinetic knee extensions (180°/s)
E-GEOD-45426	02/07/08	GSM1104124_S43.CEL	GSM1104124_S43.CEL	normal	resistance exercise	22 years	M	skeletal muscle	quadriceps	5 × 30 maximum isokinetic knee extensions (180°/s)
E-GEOD-45426	02/12/08	GSM1104123_S42.CEL	GSM1104123_S42.CEL	normal		22 years	M	skeletal muscle	quadriceps
E-GEOD-45426	02/07/08	GSM1104122_S41.CEL	GSM1104122_S41.CEL	normal		22 years	M	skeletal muscle	quadriceps
E-GEOD-45426	02/07/08	GSM1104121_S40.CEL	GSM1104121_S40.CEL	normal		22 years	M	skeletal muscle	quadriceps
E-GEOD-45426	02/07/08	GSM1104120_S39.CEL	GSM1104120_S39.CEL	normal		22 years	M	skeletal muscle	quadriceps
E-GEOD-45426	02/07/08	GSM1104119_S38.CEL	GSM1104119_S38.CEL	normal		22 years	M	skeletal muscle	quadriceps
E-GEOD-45426	02/07/08	GSM1104118_S37.CEL	GSM1104118_S37.CEL	normal		22 years	M	skeletal muscle	quadriceps
E-GEOD-45426	02/07/08	GSM1104117_S36.CEL	GSM1104117_S36.CEL	normal		22 years	M	skeletal muscle	quadriceps
E-GEOD-45426	02/07/08	GSM1104116_S35.CEL	GSM1104116_S35.CEL	normal	resistance exercise (1 bout)	22 years	M	skeletal muscle	quadriceps	5 × 30 maximum isokinetic knee extensions (180°/s)
E-GEOD-45426	02/07/08	GSM1104115_S34.CEL	GSM1104115_S34.CEL	normal	resistance exercise	22 years	M	skeletal muscle	quadriceps	5 × 30 maximum isokinetic knee extensions (180°/s)
E-GEOD-45426	02/07/08	GSM1104114_S33.CEL	GSM1104114_S33.CEL	normal		22 years	M	skeletal muscle	quadriceps
E-GEOD-45426	02/07/08	GSM1104113_S32.CEL	GSM1104113_S32.CEL	normal		22 years	M	skeletal muscle	quadriceps
E-GEOD-45426	02/07/08	GSM1104112_S31.CEL	GSM1104112_S31.CEL	normal	resistance exercise (1 bout)	22 years	M	skeletal muscle	quadriceps	5 × 30 maximum isokinetic knee extensions (180°/s)
E-GEOD-45426	02/07/08	GSM1104111_S30.CEL	GSM1104111_S30.CEL	normal	resistance exercise	22 years	M	skeletal muscle	quadriceps	5 × 30 maximum isokinetic knee extensions (180°/s)
E-GEOD-45426	02/07/08	GSM1104110_S29.CEL	GSM1104110_S29.CEL	normal		22 years	M	skeletal muscle	quadriceps
E-GEOD-45426	02/07/08	GSM1104109_S28.CEL	GSM1104109_S28.CEL	normal		22 years	M	skeletal muscle	quadriceps
E-GEOD-45426	02/07/08	GSM1104108_S27.CEL	GSM1104108_S27.CEL	normal		22 years	M	skeletal muscle	quadriceps
E-GEOD-45426	02/13/08	GSM1104106_S25.CEL	GSM1104106_S25.CEL	normal	resistance exercise (1 bout)	22 years	M	skeletal muscle	quadriceps	5 × 30 maximum isokinetic knee extensions (180°/s)
E-GEOD-45426	02/07/08	GSM1104105_S24.CEL	GSM1104105_S24.CEL	normal	resistance exercise	22 years	M	skeletal muscle	quadriceps	5 × 30 maximum isokinetic knee extensions (180°/s)
E-GEOD-45426	02/07/08	GSM1104104_S23.CEL	GSM1104104_S23.CEL	normal		22 years	M	skeletal muscle	quadriceps
E-GEOD-45426	02/07/08	GSM1104103_S22.CEL	GSM1104103_S22.CEL	normal		22 years	M	skeletal muscle	quadriceps
E-GEOD-45426	02/07/08	GSM1104102_S21.CEL	GSM1104102_S21.CEL	normal		22 years	M	skeletal muscle	quadriceps
E-GEOD-45426	02/07/08	GSM1104101_S20.CEL	GSM1104101_S20.CEL	normal	resistance exercise (2 bouts)	22 years	M	skeletal muscle	quadriceps	2 sessions of 5 × 30 maximum isokinetic knee extensions (180°/s) separated by 48 h
E-GEOD-45426	02/07/08	GSM1104100_S19.CEL	GSM1104100_S19.CEL	normal	resistance exercise (1 bout)	22 years	M	skeletal muscle	quadriceps	5 × 30 maximum isokinetic knee extensions (180°/s)
E-GEOD-45426	02/07/08	GSM1104099_S18.CEL	GSM1104099_S18.CEL	normal	resistance exercise	22 years	M	skeletal muscle	quadriceps	5 × 30 maximum isokinetic knee extensions (180°/s)
E-GEOD-45426	02/07/08	GSM1104098_S17.CEL	GSM1104098_S17.CEL	normal		22 years	M	skeletal muscle	quadriceps
E-GEOD-45426	02/07/08	GSM1104097_S16.CEL	GSM1104097_S16.CEL	normal		22 years	M	skeletal muscle	quadriceps
E-GEOD-45426	02/07/08	GSM1104096_S15.CEL	GSM1104096_S15.CEL	normal		22 years	M	skeletal muscle	quadriceps
E-GEOD-45426	02/12/08	GSM1104094_S13.CEL	GSM1104094_S13.CEL	normal	resistance exercise (2 bouts)	22 years	M	skeletal muscle	quadriceps	2 sessions of 5 × 30 maximum isokinetic knee extensions (180°/s) separated by 48 h
E-GEOD-45426	02/07/08	GSM1104093_S12.CEL	GSM1104093_S12.CEL	normal	resistance exercise (1 bout)	22 years	M	skeletal muscle	quadriceps	5 × 30 maximum isokinetic knee extensions (180°/s)
E-GEOD-45426	02/07/08	GSM1104092_S11.CEL	GSM1104092_S11.CEL	normal	resistance exercise	22 years	M	skeletal muscle	quadriceps	5 × 30 maximum isokinetic knee extensions (180°/s)
E-GEOD-45426	02/07/08	GSM1104091_S10.CEL	GSM1104091_S10.CEL	normal		22 years	M	skeletal muscle	quadriceps
E-GEOD-45426	02/07/08	GSM1104090_S9.CEL	GSM1104090_S9.CEL	normal		22 years	M	skeletal muscle	quadriceps
E-GEOD-45426	02/07/08	GSM1104089_S8.CEL	GSM1104089_S8.CEL	normal		22 years	M	skeletal muscle	quadriceps
E-GEOD-45426	02/07/08	GSM1104088_S7.CEL	GSM1104088_S7.CEL	normal		22 years	M	skeletal muscle	quadriceps
E-GEOD-45426	02/07/08	GSM1104087_S6.CEL	GSM1104087_S6.CEL	normal	resistance exercise (2 bouts)	22 years	M	skeletal muscle	quadriceps	2 sessions of 5 × 30 maximum isokinetic knee extensions (180°/s) separated by 48 h
E-GEOD-45426	02/07/08	GSM1104086_S5.CEL	GSM1104086_S5.CEL	normal	resistance exercise (2 bouts)	22 years	M	skeletal muscle	quadriceps	2 sessions of 5 × 30 maximum isokinetic knee extensions (180°/s) separated by 48 h
E-GEOD-45426	02/08/08	GSM1104085_S4.CEL	GSM1104085_S4.CEL	normal	resistance exercise (1 bout)	22 years	M	skeletal muscle	quadriceps	5 × 30 maximum isokinetic knee extensions (180°/s)
E-GEOD-45426	02/07/08	GSM1104084_S3.CEL	GSM1104084_S3.CEL	normal	resistance exercise (1 bout)	22 years	M	skeletal muscle	quadriceps	5 × 30 maximum isokinetic knee extensions (180°/s)
E-GEOD-45426	02/13/08	GSM1104083_S2.CEL	GSM1104083_S2.CEL	normal	resistance exercise	22 years	M	skeletal muscle	quadriceps	5 × 30 maximum isokinetic knee extensions (180°/s)
E-GEOD-45426	02/07/08	GSM1104082_S1.CEL	GSM1104082_S1.CEL	normal	resistance exercise	22 years	M	skeletal muscle	quadriceps	5 × 30 maximum isokinetic knee extensions (180°/s)
E-GEOD-45854	09/16/11	GSM1116681_16hPT_of_pCIneo_transfected_RMS-8_HG-U133_Plus_2_.CEL	GSM1116681_16hPT_of_pCIneo_transfected_RMS.8_HG.U133_Plus_2_.CEL	Rhabdomyosarcoma (RD) cancer cells	insertless vector control		F	cell lines
E-GEOD-45854	09/16/11	GSM1116680_16hPT_of_pCIneo_transfected_RMS-7_HG-U133_Plus_2_.CEL	GSM1116680_16hPT_of_pCIneo_transfected_RMS.7_HG.U133_Plus_2_.CEL	Rhabdomyosarcoma (RD) cancer cells	insertless vector control		F	cell lines
E-GEOD-45854	09/16/11	GSM1116679_16hPT_of_pCIneo_transfected_RMS-6_HG-U133_Plus_2_.CEL	GSM1116679_16hPT_of_pCIneo_transfected_RMS.6_HG.U133_Plus_2_.CEL	Rhabdomyosarcoma (RD) cancer cells	insertless vector control		F	cell lines
E-GEOD-45854	09/16/11	GSM1116678_16hPT_of_pCIneo_transfected_RMS-5_HG-U133_Plus_2_.CEL	GSM1116678_16hPT_of_pCIneo_transfected_RMS.5_HG.U133_Plus_2_.CEL	Rhabdomyosarcoma (RD) cancer cells	insertless vector control		F	cell lines
E-GEOD-45854	09/16/11	GSM1116677_16hPT_of_pCIneo-DUX4_transfected_RMS-8_HG-U133_Plus_2_.CEL	GSM1116677_16hPT_of_pCIneo.DUX4_transfected_RMS.8_HG.U133_Plus_2_.CEL	Rhabdomyosarcoma (RD) cancer cells	ectopic expression of DUX4		F	cell lines
E-GEOD-45854	09/16/11	GSM1116676_16hPT_of_pCIneo-DUX4_transfected_RMS-7_HG-U133_Plus_2_.CEL	GSM1116676_16hPT_of_pCIneo.DUX4_transfected_RMS.7_HG.U133_Plus_2_.CEL	Rhabdomyosarcoma (RD) cancer cells	ectopic expression of DUX4		F	cell lines
E-GEOD-45854	09/16/11	GSM1116675_16hPT_of_pCIneo-DUX4_transfected_RMS-6_HG-U133_Plus_2_.CEL	GSM1116675_16hPT_of_pCIneo.DUX4_transfected_RMS.6_HG.U133_Plus_2_.CEL	Rhabdomyosarcoma (RD) cancer cells	ectopic expression of DUX4		F	cell lines
E-GEOD-45854	09/16/11	GSM1116674_16hPT_of_pCIneo-DUX4_transfected_RMS-5_HG-U133_Plus_2_.CEL	GSM1116674_16hPT_of_pCIneo.DUX4_transfected_RMS.5_HG.U133_Plus_2_.CEL	Rhabdomyosarcoma (RD) cancer cells	ectopic expression of DUX4		F	cell lines
E-GEOD-46633	02/07/13	GSM1133460_Primary_myotubes.CEL	GSM1133460_Primary_myotubes.CEL	normal		3 days differentiation	M	myotube
E-GEOD-46633	02/07/13	GSM1133459_Primary_myoblasts.CEL	GSM1133459_Primary_myoblasts.CEL	normal		undifferentiated	M	myoblast
E-GEOD-46633	02/07/13	GSM1133458_iPSCs_Day_8_Dox.CEL	GSM1133458_iPSCs_Day_8_Dox.CEL	DMD-derived iPSC		8 days post-induction MyoD	M	iPSCs
E-GEOD-46633	02/07/13	GSM1133457_iPSCs_Day_3_Dox.CEL	GSM1133457_iPSCs_Day_3_Dox.CEL	DMD-derived iPSC		3 days post-induction MyoD	M	iPSCs
E-GEOD-46633	02/07/13	GSM1133456_iPSCs-3.CEL	GSM1133456_iPSCs.3.CEL	DMD-derived iPSC			M	iPSCs
E-GEOD-46633	02/07/13	GSM1133455_iPSCs-2.CEL	GSM1133455_iPSCs.2.CEL	normal			M	iPSCs
E-GEOD-46633	02/07/13	GSM1133454_iPSCs-1.CEL	GSM1133454_iPSCs.1.CEL	normal			M	iPSCs
E-GEOD-47874	12/30/11	GSM1161418_95_51765Pre.CEL	GSM1161418_95_51765Pre.CEL	normal	untrained	18 years	M	skeletal muscle	quadriceps
E-GEOD-47874	12/30/11	GSM1161417_93_51764Pre.CEL	GSM1161417_93_51764Pre.CEL	normal	untrained	20 years	M	skeletal muscle	quadriceps
E-GEOD-47874	12/30/11	GSM1161416_91_51762Pre.CEL	GSM1161416_91_51762Pre.CEL	normal	untrained	49 years	F	skeletal muscle	quadriceps
E-GEOD-47874	12/30/11	GSM1161415_89_51761Pre.CEL	GSM1161415_89_51761Pre.CEL	normal	untrained	52 years	M	skeletal muscle	quadriceps
E-GEOD-47874	12/30/11	GSM1161414_108_51746Pre.CEL	GSM1161414_108_51746Pre.CEL	normal	untrained	19 years	F	skeletal muscle	quadriceps
E-GEOD-47874	12/30/11	GSM1161413_106_51745Pre.CEL	GSM1161413_106_51745Pre.CEL	normal	untrained	20 years	F	skeletal muscle	quadriceps
E-GEOD-47874	12/30/11	GSM1161412_110_51725Pre.CEL	GSM1161412_110_51725Pre.CEL	normal	untrained	20 years	M	skeletal muscle	quadriceps
E-GEOD-47874	12/29/11	GSM1161411_87_51721Pre.CEL	GSM1161411_87_51721Pre.CEL	normal	untrained	52 years	M	skeletal muscle	quadriceps
E-GEOD-47874	12/29/11	GSM1161410_85_51686Pre.CEL	GSM1161410_85_51686Pre.CEL	normal	untrained	18 years	F	skeletal muscle	quadriceps
E-GEOD-47874	12/29/11	GSM1161409_83_51685Pre.CEL	GSM1161409_83_51685Pre.CEL	normal	untrained	18 years	F	skeletal muscle	quadriceps
E-GEOD-47874	12/29/11	GSM1161408_81_51684Pre.CEL	GSM1161408_81_51684Pre.CEL	normal	untrained	19 years	M	skeletal muscle	quadriceps
E-GEOD-47874	12/29/11	GSM1161407_79_51681Pre.CEL	GSM1161407_79_51681Pre.CEL	normal	untrained	50 years	M	skeletal muscle	quadriceps
E-GEOD-47874	12/30/11	GSM1161406_104_51576Pre.CEL	GSM1161406_104_51576Pre.CEL	normal	untrained	24 years	F	skeletal muscle	quadriceps
E-GEOD-47874	12/30/11	GSM1161405_103_51575Pre.CEL	GSM1161405_103_51575Pre.CEL	normal	untrained	33 years	F	skeletal muscle	quadriceps
E-GEOD-47874	12/30/11	GSM1161404_101_51574Pre.CEL	GSM1161404_101_51574Pre.CEL	normal	untrained	36 years	F	skeletal muscle	quadriceps
E-GEOD-47874	12/30/11	GSM1161403_99_51573Pre.CEL	GSM1161403_99_51573Pre.CEL	normal	untrained	37 years	F	skeletal muscle	quadriceps
E-GEOD-47874	12/30/11	GSM1161402_97_51571Pre.CEL	GSM1161402_97_51571Pre.CEL	normal	untrained	62 years	M	skeletal muscle	quadriceps
E-GEOD-47874	12/29/11	GSM1161400_68_51484Pre.CEL	GSM1161400_68_51484Pre.CEL	normal	untrained	20 years	M	skeletal muscle	quadriceps
E-GEOD-47874	12/29/11	GSM1161399_66_51483Pre.CEL	GSM1161399_66_51483Pre.CEL	normal	untrained	23 years	F	skeletal muscle	quadriceps
E-GEOD-47874	12/29/11	GSM1161398_62_51465Pre.CEL	GSM1161398_62_51465Pre.CEL	normal	untrained	17 years	F	skeletal muscle	quadriceps
E-GEOD-47874	12/29/11	GSM1161397_49_51464Pre.CEL	GSM1161397_49_51464Pre.CEL	normal	untrained	20 years	M	skeletal muscle	quadriceps
E-GEOD-47874	12/29/11	GSM1161396_60_51463Pre.CEL	GSM1161396_60_51463Pre.CEL	normal	untrained	22 years	M	skeletal muscle	quadriceps
E-GEOD-47874	12/29/11	GSM1161395_47_51461Pre.CEL	GSM1161395_47_51461Pre.CEL	normal	untrained	48 years	M	skeletal muscle	quadriceps
E-GEOD-47874	12/29/11	GSM1161394_56_51244Pre.CEL	GSM1161394_56_51244Pre.CEL	normal	untrained	24 years	M	skeletal muscle	quadriceps
E-GEOD-47874	12/29/11	GSM1161393_55_51243Pre.CEL	GSM1161393_55_51243Pre.CEL	normal	untrained	26 years	F	skeletal muscle	quadriceps
E-GEOD-47874	12/29/11	GSM1161392_53_51242Pre.CEL	GSM1161392_53_51242Pre.CEL	normal	untrained	50 years	F	skeletal muscle	quadriceps
E-GEOD-47874	12/29/11	GSM1161391_51_51241Pre.CEL	GSM1161391_51_51241Pre.CEL	normal	untrained	53 years	M	skeletal muscle	quadriceps
E-GEOD-47874	12/29/11	GSM1161390_45_51223Pre.CEL	GSM1161390_45_51223Pre.CEL	normal	untrained	24 years	M	skeletal muscle	quadriceps
E-GEOD-47874	12/29/11	GSM1161389_43_51222Pre.CEL	GSM1161389_43_51222Pre.CEL	normal	untrained	48 years	F	skeletal muscle	quadriceps
E-GEOD-47874	12/28/11	GSM1161388_41_51221Pre.CEL	GSM1161388_41_51221Pre.CEL	normal	untrained	49 years	M	skeletal muscle	quadriceps
E-GEOD-47874	12/28/11	GSM1161387_40_51204Pre.CEL	GSM1161387_40_51204Pre.CEL	normal	untrained	18 years	M	skeletal muscle	quadriceps
E-GEOD-47874	12/28/11	GSM1161386_38_51201Pre.CEL	GSM1161386_38_51201Pre.CEL	normal	untrained	50 years	M	skeletal muscle	quadriceps
E-GEOD-47874	12/28/11	GSM1161385_29_50966Pre.CEL	GSM1161385_29_50966Pre.CEL	normal	untrained	17 years	M	skeletal muscle	quadriceps
E-GEOD-47874	12/28/11	GSM1161384_26_50963Pre.CEL	GSM1161384_26_50963Pre.CEL	normal	untrained	21 years	M	skeletal muscle	quadriceps
E-GEOD-47874	12/28/11	GSM1161383_24_50961Pre.CEL	GSM1161383_24_50961Pre.CEL	normal	untrained	44 years	M	skeletal muscle	quadriceps
E-GEOD-47874	12/28/11	GSM1161382_36_50955Pre.CEL	GSM1161382_36_50955Pre.CEL	normal	untrained	17 years	M	skeletal muscle	quadriceps
E-GEOD-47874	12/28/11	GSM1161381_34_50954Pre.CEL	GSM1161381_34_50954Pre.CEL	normal	untrained	19 years	F	skeletal muscle	quadriceps
E-GEOD-47874	12/28/11	GSM1161380_32_50953Pre.CEL	GSM1161380_32_50953Pre.CEL	normal	untrained	24 years	M	skeletal muscle	quadriceps
E-GEOD-47874	12/28/11	GSM1161379_22_50926Pre.CEL	GSM1161379_22_50926Pre.CEL	normal	untrained	21 years	M	skeletal muscle	quadriceps
E-GEOD-47874	12/28/11	GSM1161378_20_50925Pre.CEL	GSM1161378_20_50925Pre.CEL	normal	untrained	17 years	M	skeletal muscle	quadriceps
E-GEOD-47874	12/28/11	GSM1161377_18_50924Pre.CEL	GSM1161377_18_50924Pre.CEL	normal	untrained	23 years	F	skeletal muscle	quadriceps
E-GEOD-47874	12/28/11	GSM1161376_16_50921Pre.CEL	GSM1161376_16_50921Pre.CEL	normal	untrained	47 years	M	skeletal muscle	quadriceps
E-GEOD-47874	12/28/11	GSM1161375_14_50905Pre.CEL	GSM1161375_14_50905Pre.CEL	normal	untrained	30 years	F	skeletal muscle	quadriceps
E-GEOD-47874	12/28/11	GSM1161374_12_50904Pre.CEL	GSM1161374_12_50904Pre.CEL	normal	untrained	34 years	F	skeletal muscle	quadriceps
E-GEOD-47874	12/28/11	GSM1161373_30_50903Pre.CEL	GSM1161373_30_50903Pre.CEL	normal	untrained	36 years	M	skeletal muscle	quadriceps
E-GEOD-47874	12/28/11	GSM1161372_10_50902Pre.CEL	GSM1161372_10_50902Pre.CEL	normal	untrained	55 years	F	skeletal muscle	quadriceps
E-GEOD-47874	12/28/11	GSM1161371_8_50704Pre.CEL	GSM1161371_8_50704Pre.CEL	normal	untrained	27 years	M	skeletal muscle	quadriceps
E-GEOD-47874	12/28/11	GSM1161370_7_50702Pre.CEL	GSM1161370_7_50702Pre.CEL	normal	untrained	50 years	F	skeletal muscle	quadriceps
E-GEOD-47874	12/28/11	GSM1161369_5_50701Pre.CEL	GSM1161369_5_50701Pre.CEL	normal	untrained	50 years	M	skeletal muscle	quadriceps
E-GEOD-47874	12/28/11	GSM1161368_3_50673Pre.CEL	GSM1161368_3_50673Pre.CEL	normal	untrained	28 years	M	skeletal muscle	quadriceps
E-GEOD-47874	12/29/11	GSM1161367_1_50672Pre.CEL	GSM1161367_1_50672Pre.CEL	normal	untrained	52 years	F	skeletal muscle	quadriceps
E-GEOD-47881	12/22/11	GSM1161859_D22_TW003L.CEL	GSM1161859_D22_TW003L.CEL	normal	trained	49 years	M	skeletal muscle	quadriceps	resistance exercise
E-GEOD-47881	12/22/11	GSM1161858_D21_TW003F.CEL	GSM1161858_D21_TW003F.CEL	normal	untrained	49 years	M	skeletal muscle	quadriceps
E-GEOD-47881	12/22/11	GSM1161857_D20_SJ079L.CEL	GSM1161857_D20_SJ079L.CEL	normal	trained	28 years	F	skeletal muscle	quadriceps	resistance exercise
E-GEOD-47881	12/22/11	GSM1161856_D19_SJ079F.CEL	GSM1161856_D19_SJ079F.CEL	normal	untrained	28 years	F	skeletal muscle	quadriceps
E-GEOD-47881	12/23/11	GSM1161855_D84_SH041L.CEL	GSM1161855_D84_SH041L.CEL	normal	trained	69 years	F	skeletal muscle	quadriceps	resistance exercise
E-GEOD-47881	12/23/11	GSM1161854_D83_SH041F.CEL	GSM1161854_D83_SH041F.CEL	normal	untrained	69 years	F	skeletal muscle	quadriceps
E-GEOD-47881	12/23/11	GSM1161853_D40_SF065L.CEL	GSM1161853_D40_SF065L.CEL	normal	trained	47 years	M	skeletal muscle	quadriceps	resistance exercise
E-GEOD-47881	12/23/11	GSM1161852_D39_SF065F.CEL	GSM1161852_D39_SF065F.CEL	normal	untrained	47 years	M	skeletal muscle	quadriceps
E-GEOD-47881	12/23/11	GSM1161851_D42_SB063L.CEL	GSM1161851_D42_SB063L.CEL	normal	trained	45 years	M	skeletal muscle	quadriceps	resistance exercise
E-GEOD-47881	12/23/11	GSM1161850_D41_SB063F.CEL	GSM1161850_D41_SB063F.CEL	normal	untrained	45 years	M	skeletal muscle	quadriceps
E-GEOD-47881	12/23/11	GSM1161849_D76_RP012L.CEL	GSM1161849_D76_RP012L.CEL	normal	trained	72 years	M	skeletal muscle	quadriceps	resistance exercise
E-GEOD-47881	12/23/11	GSM1161848_D75_RP012F.CEL	GSM1161848_D75_RP012F.CEL	normal	untrained	72 years	M	skeletal muscle	quadriceps
E-GEOD-47881	12/22/11	GSM1161847_D32_RN039L.CEL	GSM1161847_D32_RN039L.CEL	normal	trained	47 years	M	skeletal muscle	quadriceps	resistance exercise
E-GEOD-47881	12/22/11	GSM1161846_D31_RN039F.CEL	GSM1161846_D31_RN039F.CEL	normal	untrained	47 years	M	skeletal muscle	quadriceps
E-GEOD-47881	12/23/11	GSM1161845_D66_RG093L.CEL	GSM1161845_D66_RG093L.CEL	normal	trained	73 years	M	skeletal muscle	quadriceps	resistance exercise
E-GEOD-47881	12/23/11	GSM1161844_D65_RG093F.CEL	GSM1161844_D65_RG093F.CEL	normal	untrained	73 years	M	skeletal muscle	quadriceps
E-GEOD-47881	12/23/11	GSM1161843_D82_RB020L.CEL	GSM1161843_D82_RB020L.CEL	normal	trained	67 years	M	skeletal muscle	quadriceps	resistance exercise
E-GEOD-47881	12/23/11	GSM1161842_D81_RB020F.CEL	GSM1161842_D81_RB020F.CEL	normal	untrained	67 years	M	skeletal muscle	quadriceps
E-GEOD-47881	12/23/11	GSM1161841_D72_PW031L.CEL	GSM1161841_D72_PW031L.CEL	normal	trained	75 years	M	skeletal muscle	quadriceps	resistance exercise
E-GEOD-47881	12/23/11	GSM1161840_D71_PW031F.CEL	GSM1161840_D71_PW031F.CEL	normal	untrained	75 years	M	skeletal muscle	quadriceps
E-GEOD-47881	12/23/11	GSM1161839_D36_PK029L.CEL	GSM1161839_D36_PK029L.CEL	normal	trained	49 years	M	skeletal muscle	quadriceps	resistance exercise
E-GEOD-47881	12/23/11	GSM1161838_D35_PK029F.CEL	GSM1161838_D35_PK029F.CEL	normal	untrained	49 years	F	skeletal muscle	quadriceps
E-GEOD-47881	12/23/11	GSM1161837_D44_PG069L.CEL	GSM1161837_D44_PG069L.CEL	normal	trained	45 years	M	skeletal muscle	quadriceps	resistance exercise
E-GEOD-47881	12/23/11	GSM1161836_D43_PG069F.CEL	GSM1161836_D43_PG069F.CEL	normal	untrained	45 years	M	skeletal muscle	quadriceps
E-GEOD-47881	12/23/11	GSM1161835_D80_PC035L.CEL	GSM1161835_D80_PC035L.CEL	normal	trained	66 years	F	skeletal muscle	quadriceps	resistance exercise
E-GEOD-47881	12/22/11	GSM1161833_D13_NB021F.CEL	GSM1161833_D13_NB021F.CEL	normal	untrained	28 years	F	skeletal muscle	quadriceps
E-GEOD-47881	12/22/11	GSM1161832_D12_MT008L.CEL	GSM1161832_D12_MT008L.CEL	normal	trained	26 years	M	skeletal muscle	quadriceps	resistance exercise
E-GEOD-47881	12/22/11	GSM1161831_D11_MT008F.CEL	GSM1161831_D11_MT008F.CEL	normal	untrained	26 years	M	skeletal muscle	quadriceps
E-GEOD-47881	12/23/11	GSM1161830_D88_MJ022L.CEL	GSM1161830_D88_MJ022L.CEL	normal	trained	69 years	F	skeletal muscle	quadriceps	resistance exercise
E-GEOD-47881	12/23/11	GSM1161829_D87_MJ022F.CEL	GSM1161829_D87_MJ022F.CEL	normal	untrained	69 years	F	skeletal muscle	quadriceps
E-GEOD-47881	12/23/11	GSM1161828_D58_MH061L.CEL	GSM1161828_D58_MH061L.CEL	normal	trained	52 years	F	skeletal muscle	quadriceps	resistance exercise
E-GEOD-47881	12/23/11	GSM1161827_D57_MH061F.CEL	GSM1161827_D57_MH061F.CEL	normal	untrained	52 years	F	skeletal muscle	quadriceps
E-GEOD-47881	12/22/11	GSM1161826_D8_MH054L.CEL	GSM1161826_D8_MH054L.CEL	normal	trained	28 years	F	skeletal muscle	quadriceps	resistance exercise
E-GEOD-47881	12/22/11	GSM1161825_D7_MH054F.CEL	GSM1161825_D7_MH054F.CEL	normal	untrained	28 years	F	skeletal muscle	quadriceps
E-GEOD-47881	12/23/11	GSM1161824_D73_LH091F.CEL	GSM1161824_D73_LH091F.CEL	normal	untrained	71 years	F	skeletal muscle	quadriceps
E-GEOD-47881	12/23/11	GSM1161823_D74_LH091L.CEL	GSM1161823_D74_LH091L.CEL	normal	trained	71 years	F	skeletal muscle	quadriceps	resistance exercise
E-GEOD-47881	12/23/11	GSM1161822_D54_KA070L.CEL	GSM1161822_D54_KA070L.CEL	normal	trained	49 years	F	skeletal muscle	quadriceps	resistance exercise
E-GEOD-47881	12/23/11	GSM1161821_D53_KA070F.CEL	GSM1161821_D53_KA070F.CEL	normal	untrained	49 years	F	skeletal muscle	quadriceps
E-GEOD-47881	12/23/11	GSM1161820_D92_JW087L.CEL	GSM1161820_D92_JW087L.CEL	normal	trained	69 years	M	skeletal muscle	quadriceps	resistance exercise
E-GEOD-47881	12/23/11	GSM1161819_D91_JW087F.CEL	GSM1161819_D91_JW087F.CEL	normal	untrained	69 years	M	skeletal muscle	quadriceps
E-GEOD-47881	12/23/11	GSM1161818_D90_JOH099L.CEL	GSM1161818_D90_JOH099L.CEL	normal	trained	74 years	M	skeletal muscle	quadriceps	resistance exercise
E-GEOD-47881	12/23/11	GSM1161817_D89_JOH099F.CEL	GSM1161817_D89_JOH099F.CEL	normal	untrained	74 years	M	skeletal muscle	quadriceps
E-GEOD-47881	12/23/11	GSM1161816_D46_JH074L.CEL	GSM1161816_D46_JH074L.CEL	normal	trained	47 years	F	skeletal muscle	quadriceps	resistance exercise
E-GEOD-47881	12/23/11	GSM1161815_D45_JH074F.CEL	GSM1161815_D45_JH074F.CEL	normal	untrained	47 years	F	skeletal muscle	quadriceps
E-GEOD-47881	12/22/11	GSM1161814_D1_JG040L.CEL	GSM1161814_D1_JG040L.CEL	normal	trained	20 years	M	skeletal muscle	quadriceps	resistance exercise
E-GEOD-47881	12/22/11	GSM1161813_D2_JG040F.CEL	GSM1161813_D2_JG040F.CEL	normal	untrained	20 years	M	skeletal muscle	quadriceps
E-GEOD-47881	12/23/11	GSM1161812_D78_JC064L.CEL	GSM1161812_D78_JC064L.CEL	normal	trained	64 years	F	skeletal muscle	quadriceps	resistance exercise
E-GEOD-47881	12/23/11	GSM1161811_D77_JC064F.CEL	GSM1161811_D77_JC064F.CEL	normal	untrained	64 years	F	skeletal muscle	quadriceps
E-GEOD-47881	12/22/11	GSM1161810_D18_JC047L.CEL	GSM1161810_D18_JC047L.CEL	normal	trained	27 years	F	skeletal muscle	quadriceps	resistance exercise
E-GEOD-47881	12/22/11	GSM1161809_D17_JC047F.CEL	GSM1161809_D17_JC047F.CEL	normal	untrained	27 years	F	skeletal muscle	quadriceps
E-GEOD-47881	12/23/11	GSM1161808_D52_JB044L.CEL	GSM1161808_D52_JB044L.CEL	normal	trained	55 years	F	skeletal muscle	quadriceps	resistance exercise
E-GEOD-47881	12/23/11	GSM1161807_D51_JB044F.CEL	GSM1161807_D51_JB044F.CEL	normal	untrained	55 years	F	skeletal muscle	quadriceps
E-GEOD-47881	12/22/11	GSM1161806_D6_JB038L.CEL	GSM1161806_D6_JB038L.CEL	normal	trained	28 years	M	skeletal muscle	quadriceps	resistance exercise
E-GEOD-47881	12/22/11	GSM1161805_D5_JB038F.CEL	GSM1161805_D5_JB038F.CEL	normal	untrained	28 years	M	skeletal muscle	quadriceps
E-GEOD-47881	12/23/11	GSM1161804_D70_JA071L.CEL	GSM1161804_D70_JA071L.CEL	normal	trained	67 years	F	skeletal muscle	quadriceps	resistance exercise
E-GEOD-47881	12/23/11	GSM1161803_D69_JA071F.CEL	GSM1161803_D69_JA071F.CEL	normal	untrained	67 years	F	skeletal muscle	quadriceps
E-GEOD-47881	12/22/11	GSM1161802_D24_IM023L.CEL	GSM1161802_D24_IM023L.CEL	normal	trained	51 years	M	skeletal muscle	quadriceps	resistance exercise
E-GEOD-47881	12/22/11	GSM1161801_D23_IM023F.CEL	GSM1161801_D23_IM023F.CEL	normal	untrained	51 years	M	skeletal muscle	quadriceps
E-GEOD-47881	12/23/11	GSM1161800_D68_HA094L.CEL	GSM1161800_D68_HA094L.CEL	normal	trained	72 years	M	skeletal muscle	quadriceps	resistance exercise
E-GEOD-47881	12/23/11	GSM1161799_D67_HA094F.CEL	GSM1161799_D67_HA094F.CEL	normal	untrained	72 years	M	skeletal muscle	quadriceps
E-GEOD-47881	12/23/11	GSM1161798_D60_GS075L.CEL	GSM1161798_D60_GS075L.CEL	normal	trained	65 years	F	skeletal muscle	quadriceps	resistance exercise
E-GEOD-47881	12/23/11	GSM1161797_D59_GS075F.CEL	GSM1161797_D59_GS075F.CEL	normal	untrained	65 years	F	skeletal muscle	quadriceps
E-GEOD-47881	12/23/11	GSM1161796_D62_GJ095L.CEL	GSM1161796_D62_GJ095L.CEL	normal	trained	71 years	M	skeletal muscle	quadriceps	resistance exercise
E-GEOD-47881	12/23/11	GSM1161795_D61_GJ095F.CEL	GSM1161795_D61_GJ095F.CEL	normal	untrained	71 years	M	skeletal muscle	quadriceps
E-GEOD-47881	12/22/11	GSM1161794_D26_EH014L.CEL	GSM1161794_D26_EH014L.CEL	normal	trained	46 years	F	skeletal muscle	quadriceps	resistance exercise
E-GEOD-47881	12/22/11	GSM1161793_D25_EH014F.CEL	GSM1161793_D25_EH014F.CEL	normal	untrained	46 years	F	skeletal muscle	quadriceps
E-GEOD-47881	12/23/11	GSM1161792_D86_ED049L.CEL	GSM1161792_D86_ED049L.CEL	normal	trained	74 years	M	skeletal muscle	quadriceps	resistance exercise
E-GEOD-47881	12/23/11	GSM1161791_D85_ED049F.CEL	GSM1161791_D85_ED049F.CEL	normal	untrained	74 years	M	skeletal muscle	quadriceps
E-GEOD-47881	12/23/11	GSM1161790_D34_DW097L.CEL	GSM1161790_D34_DW097L.CEL	normal	trained	54 years	F	skeletal muscle	quadriceps	resistance exercise
E-GEOD-47881	12/23/11	GSM1161789_D33_DW097F.CEL	GSM1161789_D33_DW097F.CEL	normal	untrained	54 years	F	skeletal muscle	quadriceps
E-GEOD-47881	12/23/11	GSM1161788_D50_DT067L.CEL	GSM1161788_D50_DT067L.CEL	normal	trained	51 years	M	skeletal muscle	quadriceps	resistance exercise
E-GEOD-47881	12/23/11	GSM1161787_D49_DT067F.CEL	GSM1161787_D49_DT067F.CEL	normal	untrained	51 years	M	skeletal muscle	quadriceps
E-GEOD-47881	12/22/11	GSM1161786_D30_CS066L.CEL	GSM1161786_D30_CS066L.CEL	normal	trained	54 years	F	skeletal muscle	quadriceps	resistance exercise
E-GEOD-47881	12/22/11	GSM1161785_D29_CS066F.CEL	GSM1161785_D29_CS066F.CEL	normal	untrained	54 years	F	skeletal muscle	quadriceps
E-GEOD-47881	12/22/11	GSM1161784_D10_CR053L.CEL	GSM1161784_D10_CR053L.CEL	normal	trained	26 years	M	skeletal muscle	quadriceps	resistance exercise
E-GEOD-47881	12/22/11	GSM1161783_D9_CR053F.CEL	GSM1161783_D9_CR053F.CEL	normal	untrained	26 years	M	skeletal muscle	quadriceps
E-GEOD-47881	12/23/11	GSM1161782_D56_CP068L.CEL	GSM1161782_D56_CP068L.CEL	normal	trained	48 years	M	skeletal muscle	quadriceps	resistance exercise
E-GEOD-47881	12/23/11	GSM1161781_D55_CP068F.CEL	GSM1161781_D55_CP068F.CEL	normal	untrained	48 years	M	skeletal muscle	quadriceps
E-GEOD-47881	12/23/11	GSM1161780_D38_CL046L.CEL	GSM1161780_D38_CL046L.CEL	normal	trained	45 years	F	skeletal muscle	quadriceps	resistance exercise
E-GEOD-47881	12/23/11	GSM1161779_D37_CL046F.CEL	GSM1161779_D37_CL046F.CEL	normal	untrained	45 years	F	skeletal muscle	quadriceps
E-GEOD-47881	12/22/11	GSM1161778_D28_CF093L.CEL	GSM1161778_D28_CF093L.CEL	normal	trained	55 years	F	skeletal muscle	quadriceps	resistance exercise
E-GEOD-47881	12/22/11	GSM1161777_D27_CF093F.CEL	GSM1161777_D27_CF093F.CEL	normal	untrained	55 years	F	skeletal muscle	quadriceps
E-GEOD-47881	12/22/11	GSM1161776_D3_BH073L.CEL	GSM1161776_D3_BH073L.CEL	normal	trained	21 years	M	skeletal muscle	quadriceps	resistance exercise
E-GEOD-47881	12/23/11	GSM1161774_D48_AS060L.CEL	GSM1161774_D48_AS060L.CEL	normal	trained	46 years	M	skeletal muscle	quadriceps	resistance exercise
E-GEOD-47881	12/23/11	GSM1161773_D47_AS060F.CEL	GSM1161773_D47_AS060F.CEL	normal	untrained	46 years	M	skeletal muscle	quadriceps
E-GEOD-47881	12/22/11	GSM1161772_D16_AC033L.CEL	GSM1161772_D16_AC033L.CEL	normal	trained	25 years	M	skeletal muscle	quadriceps	resistance exercise
E-GEOD-47881	12/22/11	GSM1161771_D15_AC033F.CEL	GSM1161771_D15_AC033F.CEL	normal	untrained	25 years	M	skeletal muscle	quadriceps
E-GEOD-47969	11/26/10	GSM1163869_DUKE92_484.CEL	GSM1163869_DUKE92_484.CEL	normal	untrained	68 years	F	skeletal muscle	quadriceps
E-GEOD-47969	11/19/10	GSM1163868_DUKE48_413.CEL	GSM1163868_DUKE48_413.CEL	normal	untrained	68 years	M	skeletal muscle	quadriceps
E-GEOD-47969	11/16/10	GSM1163867_DUKE15_411.CEL	GSM1163867_DUKE15_411.CEL	normal	untrained	68 years	M	skeletal muscle	quadriceps
E-GEOD-47969	11/16/10	GSM1163866_DUKE23_464.CEL	GSM1163866_DUKE23_464.CEL	normal	untrained	67 years	F	skeletal muscle	quadriceps
E-GEOD-47969	11/16/10	GSM1163865_DUKE22_457.CEL	GSM1163865_DUKE22_457.CEL	normal	untrained	67 years	M	skeletal muscle	quadriceps
E-GEOD-47969	12/03/10	GSM1163864_DUKE115_415.CEL	GSM1163864_DUKE115_415.CEL	normal	untrained	67 years	M	skeletal muscle	quadriceps
E-GEOD-47969	11/26/10	GSM1163863_DUKE88_455.CEL	GSM1163863_DUKE88_455.CEL	normal	untrained	66 years	F	skeletal muscle	quadriceps
E-GEOD-47969	11/19/10	GSM1163862_DUKE42_366.CEL	GSM1163862_DUKE42_366.CEL	normal	untrained	66 years	M	skeletal muscle	quadriceps
E-GEOD-47969	11/19/10	GSM1163861_DUKE34_304.CEL	GSM1163861_DUKE34_304.CEL	normal	untrained	66 years	F	skeletal muscle	quadriceps
E-GEOD-47969	12/03/10	GSM1163860_DUKE109_371.CEL	GSM1163860_DUKE109_371.CEL	normal	untrained	65 years	M	skeletal muscle	quadriceps
E-GEOD-47969	11/16/10	GSM1163859_DUKE03_314.CEL	GSM1163859_DUKE03_314.CEL	normal	untrained	65 years	F	skeletal muscle	quadriceps
E-GEOD-47969	11/19/10	GSM1163858_DUKE58_483.CEL	GSM1163858_DUKE58_483.CEL	normal	untrained	64 years	F	skeletal muscle	quadriceps
E-GEOD-47969	11/16/10	GSM1163857_DUKE10_372.CEL	GSM1163857_DUKE10_372.CEL	normal	untrained	64 years	F	skeletal muscle	quadriceps
E-GEOD-47969	12/03/10	GSM1163856_DUKE118_444.CEL	GSM1163856_DUKE118_444.CEL	normal	untrained	63 years	M	skeletal muscle	quadriceps
E-GEOD-47969	11/16/10	GSM1163855_DUKE08_357.CEL	GSM1163855_DUKE08_357.CEL	normal	untrained	63 years	M	skeletal muscle	quadriceps
E-GEOD-47969	11/26/10	GSM1163854_DUKE80_401.CEL	GSM1163854_DUKE80_401.CEL	normal	untrained	62 years	F	skeletal muscle	quadriceps
E-GEOD-47969	11/19/10	GSM1163853_DUKE43_374.CEL	GSM1163853_DUKE43_374.CEL	normal	untrained	62 years	M	skeletal muscle	quadriceps
E-GEOD-47969	11/29/10	GSM1163852_DUKE91_476_2.CEL	GSM1163852_DUKE91_476_2.CEL	normal	untrained	61 years	M	skeletal muscle	quadriceps
E-GEOD-47969	11/26/10	GSM1163851_DUKE82_414.CEL	GSM1163851_DUKE82_414.CEL	normal	untrained	61 years	M	skeletal muscle	quadriceps
E-GEOD-47969	11/19/10	GSM1163850_DUKE53_446.CEL	GSM1163850_DUKE53_446.CEL	normal	untrained	60 years	F	skeletal muscle	quadriceps
E-GEOD-47969	11/19/10	GSM1163849_DUKE52_437.CEL	GSM1163849_DUKE52_437.CEL	normal	untrained	60 years	M	skeletal muscle	quadriceps
E-GEOD-47969	12/03/10	GSM1163848_DUKE129_726.CEL	GSM1163848_DUKE129_726.CEL	normal	untrained	60 years	F	skeletal muscle	quadriceps
E-GEOD-47969	11/26/10	GSM1163847_DUKE73_350.CEL	GSM1163847_DUKE73_350.CEL	normal	untrained	59 years	F	skeletal muscle	quadriceps
E-GEOD-47969	11/19/10	GSM1163846_DUKE50_423.CEL	GSM1163846_DUKE50_423.CEL	normal	untrained	59 years	F	skeletal muscle	quadriceps
E-GEOD-47969	11/16/10	GSM1163845_DUKE04_319.CEL	GSM1163845_DUKE04_319.CEL	normal	untrained	59 years	M	skeletal muscle	quadriceps
E-GEOD-47969	11/29/10	GSM1163844_DUKE99_742_3.CEL	GSM1163844_DUKE99_742_3.CEL	normal	untrained	58 years	F	skeletal muscle	quadriceps
E-GEOD-47969	11/26/10	GSM1163843_DUKE94_704.CEL	GSM1163843_DUKE94_704.CEL	normal	untrained	58 years	F	skeletal muscle	quadriceps
E-GEOD-47969	11/19/10	GSM1163842_DUKE55_458.CEL	GSM1163842_DUKE55_458.CEL	normal	untrained	58 years	F	skeletal muscle	quadriceps
E-GEOD-47969	11/16/10	GSM1163841_DUKE17_421.CEL	GSM1163841_DUKE17_421.CEL	normal	untrained	58 years	M	skeletal muscle	quadriceps
E-GEOD-47969	12/03/10	GSM1163840_DUKE113_403.CEL	GSM1163840_DUKE113_403.CEL	normal	untrained	58 years	M	skeletal muscle	quadriceps
E-GEOD-47969	11/19/10	GSM1163839_DUKE60_703.CEL	GSM1163839_DUKE60_703.CEL	normal	untrained	57 years	M	skeletal muscle	quadriceps
E-GEOD-47969	11/16/10	GSM1163838_DUKE31_740.CEL	GSM1163838_DUKE31_740.CEL	normal	untrained	57 years	M	skeletal muscle	quadriceps
E-GEOD-47969	12/03/10	GSM1163837_DUKE104_331.CEL	GSM1163837_DUKE104_331.CEL	normal	untrained	57 years	F	skeletal muscle	quadriceps
E-GEOD-47969	11/19/10	GSM1163836_DUKE49_417.CEL	GSM1163836_DUKE49_417.CEL	normal	untrained	56 years	M	skeletal muscle	quadriceps
E-GEOD-47969	11/16/10	GSM1163835_DUKE14_404.CEL	GSM1163835_DUKE14_404.CEL	normal	untrained	56 years	F	skeletal muscle	quadriceps
E-GEOD-47969	12/03/10	GSM1163834_DUKE122_473.CEL	GSM1163834_DUKE122_473.CEL	normal	untrained	56 years	F	skeletal muscle	quadriceps
E-GEOD-47969	11/26/10	GSM1163833_DUKE89_460.CEL	GSM1163833_DUKE89_460.CEL	normal	untrained	55 years	F	skeletal muscle	quadriceps
E-GEOD-47969	11/26/10	GSM1163832_DUKE78_382.CEL	GSM1163832_DUKE78_382.CEL	normal	untrained	55 years	F	skeletal muscle	quadriceps
E-GEOD-47969	11/26/10	GSM1163831_DUKE77_375.CEL	GSM1163831_DUKE77_375.CEL	normal	untrained	55 years	M	skeletal muscle	quadriceps
E-GEOD-47969	11/19/10	GSM1163830_DUKE51_430.CEL	GSM1163830_DUKE51_430.CEL	normal	untrained	55 years	F	skeletal muscle	quadriceps
E-GEOD-47969	11/19/10	GSM1163829_DUKE37_329.CEL	GSM1163829_DUKE37_329.CEL	normal	untrained	55 years	F	skeletal muscle	quadriceps
E-GEOD-47969	11/16/10	GSM1163828_DUKE30_731.CEL	GSM1163828_DUKE30_731.CEL	normal	untrained	55 years	M	skeletal muscle	quadriceps
E-GEOD-47969	12/03/10	GSM1163827_DUKE120_456.CEL	GSM1163827_DUKE120_456.CEL	normal	untrained	55 years	M	skeletal muscle	quadriceps
E-GEOD-47969	11/26/10	GSM1163826_DUKE24_482.CEL	GSM1163826_DUKE24_482.CEL	normal	untrained	54 years	F	skeletal muscle	quadriceps
E-GEOD-47969	12/03/10	GSM1163825_DUKE110_376.CEL	GSM1163825_DUKE110_376.CEL	normal	untrained	54 years	F	skeletal muscle	quadriceps
E-GEOD-47969	11/19/10	GSM1163824_DUKE62_715.CEL	GSM1163824_DUKE62_715.CEL	normal	untrained	53 years	F	skeletal muscle	quadriceps
E-GEOD-47969	11/19/10	GSM1163823_DUKE47_406.CEL	GSM1163823_DUKE47_406.CEL	normal	untrained	53 years	F	skeletal muscle	quadriceps
E-GEOD-47969	11/19/10	GSM1163822_DUKE45_386.CEL	GSM1163822_DUKE45_386.CEL	normal	untrained	53 years	M	skeletal muscle	quadriceps
E-GEOD-47969	12/03/10	GSM1163821_DUKE131_743.CEL	GSM1163821_DUKE131_743.CEL	normal	untrained	53 years	F	skeletal muscle	quadriceps
E-GEOD-47969	12/03/10	GSM1163820_DUKE124_485.CEL	GSM1163820_DUKE124_485.CEL	normal	untrained	53 years	M	skeletal muscle	quadriceps
E-GEOD-47969	11/16/10	GSM1163819_DUKE11_379.CEL	GSM1163819_DUKE11_379.CEL	normal	untrained	53 years	F	skeletal muscle	quadriceps
E-GEOD-47969	12/03/10	GSM1163818_DUKE101_308.CEL	GSM1163818_DUKE101_308.CEL	normal	untrained	52 years	F	skeletal muscle	quadriceps
E-GEOD-47969	11/26/10	GSM1163817_DUKE79_387.CEL	GSM1163817_DUKE79_387.CEL	normal	untrained	51 years	M	skeletal muscle	quadriceps
E-GEOD-47969	11/26/10	GSM1163816_DUKE72_335.CEL	GSM1163816_DUKE72_335.CEL	normal	untrained	51 years	M	skeletal muscle	quadriceps
E-GEOD-47969	11/19/10	GSM1163815_DUKE40_354.CEL	GSM1163815_DUKE40_354.CEL	normal	untrained	51 years	M	skeletal muscle	quadriceps
E-GEOD-47969	12/03/10	GSM1163814_DUKE108_361.CEL	GSM1163814_DUKE108_361.CEL	normal	untrained	51 years	F	skeletal muscle	quadriceps
E-GEOD-47969	11/26/10	GSM1163813_DUKE85_434.CEL	GSM1163813_DUKE85_434.CEL	normal	untrained	50 years	F	skeletal muscle	quadriceps
E-GEOD-47969	11/26/10	GSM1163812_DUKE75_360.CEL	GSM1163812_DUKE75_360.CEL	normal	untrained	50 years	M	skeletal muscle	quadriceps
E-GEOD-47969	11/19/10	GSM1163811_DUKE59_488.CEL	GSM1163811_DUKE59_488.CEL	normal	untrained	50 years	F	skeletal muscle	quadriceps
E-GEOD-47969	11/16/10	GSM1163810_DUKE19_436.CEL	GSM1163810_DUKE19_436.CEL	normal	untrained	50 years	F	skeletal muscle	quadriceps
E-GEOD-47969	12/03/10	GSM1163809_DUKE112_389.CEL	GSM1163809_DUKE112_389.CEL	normal	untrained	50 years	F	skeletal muscle	quadriceps
E-GEOD-47969	12/03/10	GSM1163808_DUKE107_356.CEL	GSM1163808_DUKE107_356.CEL	normal	untrained	50 years	F	skeletal muscle	quadriceps
E-GEOD-47969	11/19/10	GSM1163807_DUKE39_340.CEL	GSM1163807_DUKE39_340.CEL	normal	untrained	49 years	F	skeletal muscle	quadriceps
E-GEOD-47969	12/03/10	GSM1163806_DUKE123_481.CEL	GSM1163806_DUKE123_481.CEL	normal	untrained	49 years	M	skeletal muscle	quadriceps
E-GEOD-47969	12/03/10	GSM1163805_DUKE105_336.CEL	GSM1163805_DUKE105_336.CEL	normal	untrained	49 years	F	skeletal muscle	quadriceps
E-GEOD-47969	11/16/10	GSM1163804_DUKE05_333.CEL	GSM1163804_DUKE05_333.CEL	normal	untrained	49 years	F	skeletal muscle	quadriceps
E-GEOD-47969	11/26/10	GSM1163803_DUKE83_418.CEL	GSM1163803_DUKE83_418.CEL	normal	untrained	48 years	M	skeletal muscle	quadriceps
E-GEOD-47969	11/26/10	GSM1163802_DUKE70_317.CEL	GSM1163802_DUKE70_317.CEL	normal	untrained	48 years	M	skeletal muscle	quadriceps
E-GEOD-47969	11/19/10	GSM1163801_DUKE56_465.CEL	GSM1163801_DUKE56_465.CEL	normal	untrained	48 years	F	skeletal muscle	quadriceps
E-GEOD-47969	12/03/10	GSM1163800_DUKE121_463.CEL	GSM1163800_DUKE121_463.CEL	normal	untrained	48 years	F	skeletal muscle	quadriceps
E-GEOD-47969	12/03/10	GSM1163799_DUKE119_448.CEL	GSM1163799_DUKE119_448.CEL	normal	untrained	48 years	F	skeletal muscle	quadriceps
E-GEOD-47969	11/26/10	GSM1163798_DUKE69_312.CEL	GSM1163798_DUKE69_312.CEL	normal	untrained	47 years	F	skeletal muscle	quadriceps
E-GEOD-47969	11/16/10	GSM1163797_DUKE20_445.CEL	GSM1163797_DUKE20_445.CEL	normal	untrained	47 years	F	skeletal muscle	quadriceps
E-GEOD-47969	12/03/10	GSM1163796_DUKE103_318.CEL	GSM1163796_DUKE103_318.CEL	normal	untrained	47 years	M	skeletal muscle	quadriceps
E-GEOD-47969	11/16/10	GSM1163795_DUKE02_309.CEL	GSM1163795_DUKE02_309.CEL	normal	untrained	47 years	F	skeletal muscle	quadriceps
E-GEOD-47969	12/03/10	GSM1163794_DUKE98_738.CEL	GSM1163794_DUKE98_738.CEL	normal	untrained	46 years	M	skeletal muscle	quadriceps
E-GEOD-47969	11/26/10	GSM1163793_DUKE71_330.CEL	GSM1163793_DUKE71_330.CEL	normal	untrained	46 years	M	skeletal muscle	quadriceps
E-GEOD-47969	11/19/10	GSM1163792_DUKE66_749.CEL	GSM1163792_DUKE66_749.CEL	normal	untrained	46 years	M	skeletal muscle	quadriceps
E-GEOD-47969	11/19/10	GSM1163790_DUKE35_311.CEL	GSM1163790_DUKE35_311.CEL	normal	untrained	46 years	F	skeletal muscle	quadriceps
E-GEOD-47969	12/03/10	GSM1163789_DUKE127_709.CEL	GSM1163789_DUKE127_709.CEL	normal	untrained	46 years	F	skeletal muscle	quadriceps
E-GEOD-47969	11/29/10	GSM1163788_DUKE97_724_2.CEL	GSM1163788_DUKE97_724_2.CEL	normal	untrained	45 years	F	skeletal muscle	quadriceps
E-GEOD-47969	11/26/10	GSM1163787_DUKE87_447.CEL	GSM1163787_DUKE87_447.CEL	normal	untrained	45 years	M	skeletal muscle	quadriceps
E-GEOD-47969	11/26/10	GSM1163786_DUKE76_367.CEL	GSM1163786_DUKE76_367.CEL	normal	untrained	45 years	F	skeletal muscle	quadriceps
E-GEOD-47969	11/19/10	GSM1163785_DUKE67_754.CEL	GSM1163785_DUKE67_754.CEL	normal	untrained	45 years	M	skeletal muscle	quadriceps
E-GEOD-47969	12/03/10	GSM1163784_DUKE130_739.CEL	GSM1163784_DUKE130_739.CEL	normal	untrained	45 years	M	skeletal muscle	quadriceps
E-GEOD-47969	12/03/10	GSM1163783_DUKE102_313.CEL	GSM1163783_DUKE102_313.CEL	normal	untrained	45 years	F	skeletal muscle	quadriceps
E-GEOD-47969	11/26/10	GSM1163782_DUKE86_439.CEL	GSM1163782_DUKE86_439.CEL	normal	untrained	44 years	F	skeletal muscle	quadriceps
E-GEOD-47969	11/16/10	GSM1163781_DUKE33_753.CEL	GSM1163781_DUKE33_753.CEL	normal	untrained	44 years	F	skeletal muscle	quadriceps
E-GEOD-47969	11/16/10	GSM1163780_DUKE12_385.CEL	GSM1163780_DUKE12_385.CEL	normal	untrained	44 years	F	skeletal muscle	quadriceps
E-GEOD-47969	12/03/10	GSM1163779_DUKE117_435.CEL	GSM1163779_DUKE117_435.CEL	normal	untrained	44 years	M	skeletal muscle	quadriceps
E-GEOD-47969	11/29/10	GSM1163778_DUKE100_750_2.CEL	GSM1163778_DUKE100_750_2.CEL	normal	untrained	44 years	M	skeletal muscle	quadriceps
E-GEOD-47969	11/16/10	GSM1163777_DUKE28_711.CEL	GSM1163777_DUKE28_711.CEL	normal	untrained	42 years	M	skeletal muscle	quadriceps
E-GEOD-47969	12/03/10	GSM1163776_DUKE126_705.CEL	GSM1163776_DUKE126_705.CEL	normal	untrained	42 years	M	skeletal muscle	quadriceps
E-GEOD-47969	11/16/10	GSM1163775_DUKE01_301.CEL	GSM1163775_DUKE01_301.CEL	normal	untrained	42 years	F	skeletal muscle	quadriceps
E-GEOD-47969	11/26/10	GSM1163774_DUKE95_708.CEL	GSM1163774_DUKE95_708.CEL	normal	untrained	41 years	M	skeletal muscle	quadriceps
E-GEOD-47969	12/03/10	GSM1163773_DUKE41b_359.CEL	GSM1163773_DUKE41b_359.CEL	normal	untrained	41 years	F	skeletal muscle	quadriceps
E-GEOD-47969	11/16/10	GSM1163771_DUKE13_393.CEL	GSM1163771_DUKE13_393.CEL	normal	untrained	41 years	M	skeletal muscle	quadriceps
E-GEOD-47969	12/03/10	GSM1163769_DUKE106_351.CEL	GSM1163769_DUKE106_351.CEL	normal	untrained	41 years	M	skeletal muscle	quadriceps
E-GEOD-47969	11/26/10	GSM1163767_DUKE90_466.CEL	GSM1163767_DUKE90_466.CEL	normal	untrained	40 years	M	skeletal muscle	quadriceps
E-GEOD-47969	11/16/10	GSM1163765_DUKE26_701.CEL	GSM1163765_DUKE26_701.CEL	normal	untrained	40 years	F	skeletal muscle	quadriceps
E-GEOD-47969	11/26/10	GSM1163763_DUKE96_717.CEL	GSM1163763_DUKE96_717.CEL	normal	untrained	39 years	M	skeletal muscle	quadriceps
E-GEOD-47969	12/03/10	GSM1163761_DUKE128_718.CEL	GSM1163761_DUKE128_718.CEL	normal	untrained	39 years	M	skeletal muscle	quadriceps
E-GEOD-47969	12/03/10	GSM1163760_DUKE65b_741.CEL	GSM1163760_DUKE65b_741.CEL	normal	untrained	38 years	M	skeletal muscle	quadriceps
E-GEOD-47969	11/19/10	GSM1163758_DUKE61_707.CEL	GSM1163758_DUKE61_707.CEL	normal	untrained	38 years	M	skeletal muscle	quadriceps
E-GEOD-47969	12/03/10	GSM1163757_DUKE125_492.CEL	GSM1163757_DUKE125_492.CEL	normal	untrained	38 years	M	skeletal muscle	quadriceps
E-GEOD-47969	11/16/10	GSM1163755_DUKE29_720.CEL	GSM1163755_DUKE29_720.CEL	normal	untrained	37 years	F	skeletal muscle	quadriceps
E-GEOD-47969	11/16/10	GSM1163753_DUKE18_433.CEL	GSM1163753_DUKE18_433.CEL	normal	untrained	37 years	F	skeletal muscle	quadriceps
E-GEOD-47969	11/19/10	GSM1163752_DUKE57_475.CEL	GSM1163752_DUKE57_475.CEL	normal	untrained	36 years	F	skeletal muscle	quadriceps
E-GEOD-47969	11/19/10	GSM1163750_DUKE54_453.CEL	GSM1163750_DUKE54_453.CEL	normal	untrained	36 years	F	skeletal muscle	quadriceps
E-GEOD-47969	11/19/10	GSM1163749_DUKE64_735.CEL	GSM1163749_DUKE64_735.CEL	normal	untrained	35 years	M	skeletal muscle	quadriceps
E-GEOD-47969	11/19/10	GSM1163747_DUKE44_380.CEL	GSM1163747_DUKE44_380.CEL	normal	untrained	35 years	F	skeletal muscle	quadriceps
E-GEOD-47969	11/16/10	GSM1163746_DUKE27_706.CEL	GSM1163746_DUKE27_706.CEL	normal	untrained	35 years	M	skeletal muscle	quadriceps
E-GEOD-47969	11/16/10	GSM1163744_DUKE07_352.CEL	GSM1163744_DUKE07_352.CEL	normal	untrained	35 years	M	skeletal muscle	quadriceps
E-GEOD-47969	11/26/10	GSM1163743_DUKE68_305.CEL	GSM1163743_DUKE68_305.CEL	normal	untrained	34 years	F	skeletal muscle	quadriceps
E-GEOD-47969	11/16/10	GSM1163741_DUKE09_364.CEL	GSM1163741_DUKE09_364.CEL	normal	untrained	34 years	M	skeletal muscle	quadriceps
E-GEOD-47969	11/26/10	GSM1163739_DUKE84_425.CEL	GSM1163739_DUKE84_425.CEL	normal	untrained	32 years	M	skeletal muscle	quadriceps
E-GEOD-47969	11/16/10	GSM1163737_DUKE25_486.CEL	GSM1163737_DUKE25_486.CEL	normal	untrained	31 years	F	skeletal muscle	quadriceps
E-GEOD-47969	11/16/10	GSM1163735_DUKE21_449.CEL	GSM1163735_DUKE21_449.CEL	normal	untrained	31 years	F	skeletal muscle	quadriceps
E-GEOD-47969	11/19/10	GSM1163734_DUKE36_316.CEL	GSM1163734_DUKE36_316.CEL	normal	untrained	29 years	M	skeletal muscle	quadriceps
E-GEOD-47969	12/03/10	GSM1163731_DUKE114_410.CEL	GSM1163731_DUKE114_410.CEL	normal	untrained	29 years	M	skeletal muscle	quadriceps
E-GEOD-47969	11/26/10	GSM1163729_DUKE74_355.CEL	GSM1163729_DUKE74_355.CEL	normal	untrained	28 years	M	skeletal muscle	quadriceps
E-GEOD-47969	11/16/10	GSM1163727_DUKE06_339.CEL	GSM1163727_DUKE06_339.CEL	normal	untrained	26 years	F	skeletal muscle	quadriceps
E-GEOD-47969	11/26/10	GSM1163725_DUKE93_491.CEL	GSM1163725_DUKE93_491.CEL	normal	untrained	25 years	F	skeletal muscle	quadriceps
E-GEOD-47969	12/03/10	GSM1163723_DUKE111_384.CEL	GSM1163723_DUKE111_384.CEL	normal	untrained	24 years	M	skeletal muscle	quadriceps
E-GEOD-48278	10/28/08	GSM1174155_MJH_STRRIDE_S401_F_PRE_1_HG-U133_Plus_2_.CEL	GSM1174155_MJH_STRRIDE_S401_F_PRE_1_HG.U133_Plus_2_.CEL	normal	untrained	62 years	F	skeletal muscle	quadriceps	Caucasian
E-GEOD-48278	12/05/08	GSM1174153_MJH_STRRIDE_S387_E_PRE_1_HG-U133_Plus_2_.CEL	GSM1174153_MJH_STRRIDE_S387_E_PRE_1_HG.U133_Plus_2_.CEL	normal	untrained	51 years	M	skeletal muscle	quadriceps	Caucasian
E-GEOD-48278	12/05/08	GSM1174152_MJH_STRRIDE_S387_E_POST_1_HG-U133_Plus_2_.CEL	GSM1174152_MJH_STRRIDE_S387_E_POST_1_HG.U133_Plus_2_.CEL	normal	trained	51 years	M	skeletal muscle	quadriceps	Caucasian	E (Aerobic + Resistance exercise)
E-GEOD-48278	12/05/08	GSM1174151_MJH_STRRIDE_S379_E_Pre_1_HG-U133_Plus_2_.CEL	GSM1174151_MJH_STRRIDE_S379_E_Pre_1_HG.U133_Plus_2_.CEL	normal	untrained	53 years	F	skeletal muscle	quadriceps	Caucasian
E-GEOD-48278	12/05/08	GSM1174150_MJH_STRRIDE_S379_E_POST_1_HG-U133_Plus_2_.CEL	GSM1174150_MJH_STRRIDE_S379_E_POST_1_HG.U133_Plus_2_.CEL	normal	trained	53 years	F	skeletal muscle	quadriceps	Caucasian	E (Aerobic + Resistance exercise)
E-GEOD-48278	11/25/08	GSM1174149_MJH_STRRIDE_S367_F_PRE_1_HG-U133_Plus_2_.CEL	GSM1174149_MJH_STRRIDE_S367_F_PRE_1_HG.U133_Plus_2_.CEL	normal	untrained	45 years	F	skeletal muscle	quadriceps	Caucasian
E-GEOD-48278	11/25/08	GSM1174148_MJH_STRRIDE_S367_F_POST_1_HG-U133_Plus_2_.CEL	GSM1174148_MJH_STRRIDE_S367_F_POST_1_HG.U133_Plus_2_.CEL	normal	trained	45 years	F	skeletal muscle	quadriceps	Caucasian	F (Resistance exercise)
E-GEOD-48278	11/25/08	GSM1174147_MJH_STRRIDE_S366_F_PRE_1_HG-U133_Plus_2_.CEL	GSM1174147_MJH_STRRIDE_S366_F_PRE_1_HG.U133_Plus_2_.CEL	normal	untrained	66 years	M	skeletal muscle	quadriceps	Caucasian
E-GEOD-48278	11/25/08	GSM1174146_MJH_STRRIDE_S366_F_POST_1_HG-U133_Plus_2_.CEL	GSM1174146_MJH_STRRIDE_S366_F_POST_1_HG.U133_Plus_2_.CEL	normal	trained	66 years	M	skeletal muscle	quadriceps	Caucasian	F (Resistance exercise)
E-GEOD-48278	11/25/08	GSM1174145_MJH_STRRIDE_S361_F_PRE_1_HG-U133_Plus_2_.CEL	GSM1174145_MJH_STRRIDE_S361_F_PRE_1_HG.U133_Plus_2_.CEL	normal	untrained	51 years	F	skeletal muscle	quadriceps	Caucasian
E-GEOD-48278	11/25/08	GSM1174144_MJH_STRRIDE_S361_F_POST_1_HG-U133_Plus_2_.CEL	GSM1174144_MJH_STRRIDE_S361_F_POST_1_HG.U133_Plus_2_.CEL	normal	trained	51 years	F	skeletal muscle	quadriceps	Caucasian	F (Resistance exercise)
E-GEOD-48278	11/25/08	GSM1174143_MJH_STRRIDE_S359_E_PRE_1_HG-U133_Plus_2_.CEL	GSM1174143_MJH_STRRIDE_S359_E_PRE_1_HG.U133_Plus_2_.CEL	normal	untrained	41 years	F	skeletal muscle	quadriceps	Caucasian
E-GEOD-48278	11/25/08	GSM1174142_MJH_STRRIDE_S359_E_POST_1_HG-U133_Plus_2_.CEL	GSM1174142_MJH_STRRIDE_S359_E_POST_1_HG.U133_Plus_2_.CEL	normal	trained	41 years	F	skeletal muscle	quadriceps	Caucasian	E (Aerobic + Resistance exercise)
E-GEOD-48278	01/09/09	GSM1174141_MJH_STRRIDE_S357_F_PRE_1_HG-U133_Plus_2_.CEL	GSM1174141_MJH_STRRIDE_S357_F_PRE_1_HG.U133_Plus_2_.CEL	normal	untrained	63 years	M	skeletal muscle	quadriceps	Caucasian
E-GEOD-48278	01/09/09	GSM1174140_MJH_STRRIDE_S357_F_POST_1_HG-U133_Plus_2_.CEL	GSM1174140_MJH_STRRIDE_S357_F_POST_1_HG.U133_Plus_2_.CEL	normal	trained	63 years	M	skeletal muscle	quadriceps	Caucasian	F (Resistance exercise)
E-GEOD-48278	11/07/08	GSM1174139_MJH_STRRIDE_S356_F_PRE_1_HG-U133_Plus_2_.CEL	GSM1174139_MJH_STRRIDE_S356_F_PRE_1_HG.U133_Plus_2_.CEL	normal	untrained	50 years	F	skeletal muscle	quadriceps	Caucasian
E-GEOD-48278	11/07/08	GSM1174138_MJH_STRRIDE_S356_F_POST_1_HG-U133_Plus_2_.CEL	GSM1174138_MJH_STRRIDE_S356_F_POST_1_HG.U133_Plus_2_.CEL	normal	trained	50 years	F	skeletal muscle	quadriceps	Caucasian	F (Resistance exercise)
E-GEOD-48278	01/09/09	GSM1174137_MJH_STRRIDE_S354_E_PRE_1_HG-U133_Plus_2_.CEL	GSM1174137_MJH_STRRIDE_S354_E_PRE_1_HG.U133_Plus_2_.CEL	normal	untrained	51 years	M	skeletal muscle	quadriceps	Caucasian
E-GEOD-48278	01/09/09	GSM1174136_MJH_STRRIDE_S354_E_POST_1_HG-U133_Plus_2_.CEL	GSM1174136_MJH_STRRIDE_S354_E_POST_1_HG.U133_Plus_2_.CEL	normal	trained	51 years	M	skeletal muscle	quadriceps	Caucasian	E (Aerobic + Resistance exercise)
E-GEOD-48278	11/06/08	GSM1174135_MJH_STRRIDE_S352_F_PRE_1_HG-U133_Plus_2_.CEL	GSM1174135_MJH_STRRIDE_S352_F_PRE_1_HG.U133_Plus_2_.CEL	normal	untrained	35 years	M	skeletal muscle	quadriceps	Caucasian
E-GEOD-48278	11/06/08	GSM1174134_MJH_STRRIDE_S352_F_POST_1_HG-U133_Plus_2_.CEL	GSM1174134_MJH_STRRIDE_S352_F_POST_1_HG.U133_Plus_2_.CEL	normal	trained	35 years	M	skeletal muscle	quadriceps	Caucasian	F (Resistance exercise)
E-GEOD-48278	10/28/08	GSM1174133_MJH_STRRIDE_S336_F_PRE_1_HG-U133_Plus_2_.CEL	GSM1174133_MJH_STRRIDE_S336_F_PRE_1_HG.U133_Plus_2_.CEL	normal	untrained	49 years	F	skeletal muscle	quadriceps	Caucasian
E-GEOD-48278	10/28/08	GSM1174132_MJH_STRRIDE_S336_F_POST_1_HG-U133_Plus_2_.CEL	GSM1174132_MJH_STRRIDE_S336_F_POST_1_HG.U133_Plus_2_.CEL	normal	trained	49 years	F	skeletal muscle	quadriceps	Caucasian	F (Resistance exercise)
E-GEOD-48278	11/25/08	GSM1174131_MJH_STRRIDE_S335_E_PRE_1_HG-U133_Plus_2_.CEL	GSM1174131_MJH_STRRIDE_S335_E_PRE_1_HG.U133_Plus_2_.CEL	normal	untrained	51 years	M	skeletal muscle	quadriceps	Caucasian
E-GEOD-48278	11/25/08	GSM1174130_MJH_STRRIDE_S335_E_POST_1_HG-U133_Plus_2_.CEL	GSM1174130_MJH_STRRIDE_S335_E_POST_1_HG.U133_Plus_2_.CEL	normal	trained	51 years	M	skeletal muscle	quadriceps	Caucasian	E (Aerobic + Resistance exercise)
E-GEOD-48278	03/04/09	GSM1174129_MJH_STRRIDE_S334_D_PRE_1_HG-U133_Plus_2_.CEL	GSM1174129_MJH_STRRIDE_S334_D_PRE_1_HG.U133_Plus_2_.CEL	normal	untrained	46 years	M	skeletal muscle	quadriceps	Caucasian
E-GEOD-48278	03/04/09	GSM1174128_MJH_STRRIDE_S334_D_POST_1_HG-U133_Plus_2_.CEL	GSM1174128_MJH_STRRIDE_S334_D_POST_1_HG.U133_Plus_2_.CEL	normal	trained	46 years	M	skeletal muscle	quadriceps	Caucasian	D (Moderate aerobic exercise)
E-GEOD-48278	12/06/08	GSM1174127_MJH_STRRIDE_S330_B_PRE_1_HG-U133_Plus_2_.CEL	GSM1174127_MJH_STRRIDE_S330_B_PRE_1_HG.U133_Plus_2_.CEL	normal	untrained	46 years	M	skeletal muscle	quadriceps	Caucasian
E-GEOD-48278	12/06/08	GSM1174126_MJH_STRRIDE_S330_B_POST_1_HG-U133_Plus_2_.CEL	GSM1174126_MJH_STRRIDE_S330_B_POST_1_HG.U133_Plus_2_.CEL	normal	trained	46 years	M	skeletal muscle	quadriceps	Caucasian	B (Inactive control)
E-GEOD-48278	12/06/08	GSM1174125_MJH_STRRIDE_S326_B_PRE_1_HG-U133_Plus_2_.CEL	GSM1174125_MJH_STRRIDE_S326_B_PRE_1_HG.U133_Plus_2_.CEL	normal	untrained	22 years	M	skeletal muscle	quadriceps	Caucasian
E-GEOD-48278	12/06/08	GSM1174124_MJH_STRRIDE_S326_B_POST_1_HG-U133_Plus_2_.CEL	GSM1174124_MJH_STRRIDE_S326_B_POST_1_HG.U133_Plus_2_.CEL	normal	trained	22 years	M	skeletal muscle	quadriceps	Caucasian	B (Inactive control)
E-GEOD-48278	11/07/08	GSM1174121_MJH_STRRIDE_S316_E_PRE_1_HG-U133_Plus_2_.CEL	GSM1174121_MJH_STRRIDE_S316_E_PRE_1_HG.U133_Plus_2_.CEL	normal	untrained	29 years	M	skeletal muscle	quadriceps	African American
E-GEOD-48278	11/07/08	GSM1174120_MJH_STRRIDE_S316_E_POST_1_HG-U133_Plus_2_.CEL	GSM1174120_MJH_STRRIDE_S316_E_POST_1_HG.U133_Plus_2_.CEL	normal	trained	29 years	M	skeletal muscle	quadriceps	African American	E (Aerobic + Resistance exercise)
E-GEOD-48278	11/06/08	GSM1174119_MJH_STRRIDE_S314_E_PRE_1_HG-U133_Plus_2_.CEL	GSM1174119_MJH_STRRIDE_S314_E_PRE_1_HG.U133_Plus_2_.CEL	normal	untrained	65 years	F	skeletal muscle	quadriceps	African American
E-GEOD-48278	11/06/08	GSM1174118_MJH_STRRIDE_S314_E_POST_1_HG-U133_Plus_2_.CEL	GSM1174118_MJH_STRRIDE_S314_E_POST_1_HG.U133_Plus_2_.CEL	normal	trained	65 years	F	skeletal muscle	quadriceps	African American	E (Aerobic + Resistance exercise)
E-GEOD-48278	10/23/08	GSM1174117_MJH_STRRIDE_S301_E_PRE_1_HG-U133_Plus_2_.CEL	GSM1174117_MJH_STRRIDE_S301_E_PRE_1_HG.U133_Plus_2_.CEL	normal	untrained	42 years	F	skeletal muscle	quadriceps	Caucasian
E-GEOD-48278	01/09/09	GSM1174115_MJH_STRRIDE_S281_C_PRE_1_HG-U133_Plus_2_.CEL	GSM1174115_MJH_STRRIDE_S281_C_PRE_1_HG.U133_Plus_2_.CEL	normal	untrained	40 years	M	skeletal muscle	quadriceps	Caucasian
E-GEOD-48278	01/09/09	GSM1174114_MJH_STRRIDE_S281_C_POST_1_HG-U133_Plus_2_.CEL	GSM1174114_MJH_STRRIDE_S281_C_POST_1_HG.U133_Plus_2_.CEL	normal	trained	40 years	M	skeletal muscle	quadriceps	Caucasian	C (High aerobic exercise)
E-GEOD-48278	12/05/08	GSM1174113_MJH_STRRIDE_S277_C_PRE_1_HG-U133_Plus_2_.CEL	GSM1174113_MJH_STRRIDE_S277_C_PRE_1_HG.U133_Plus_2_.CEL	normal	untrained	56 years	M	skeletal muscle	quadriceps	Caucasian
E-GEOD-48278	12/05/08	GSM1174112_MJH_STRRIDE_S277_C_POST_1_HG-U133_Plus_2_.CEL	GSM1174112_MJH_STRRIDE_S277_C_POST_1_HG.U133_Plus_2_.CEL	normal	trained	56 years	M	skeletal muscle	quadriceps	Caucasian	C (High aerobic exercise)
E-GEOD-48278	03/04/09	GSM1174111_MJH_STRRIDE_S273_D_PRE_1_HG-U133_Plus_2_.CEL	GSM1174111_MJH_STRRIDE_S273_D_PRE_1_HG.U133_Plus_2_.CEL	normal	untrained	55 years	M	skeletal muscle	quadriceps	Caucasian
E-GEOD-48278	03/04/09	GSM1174110_MJH_STRRIDE_S273_D_POST_1_HG-U133_Plus_2_.CEL	GSM1174110_MJH_STRRIDE_S273_D_POST_1_HG.U133_Plus_2_.CEL	normal	trained	55 years	M	skeletal muscle	quadriceps	Caucasian	D (Moderate aerobic exercise)
E-GEOD-48278	12/06/08	GSM1174109_MJH_STRRIDE_S268_D_PRE_1_HG-U133_Plus_2_.CEL	GSM1174109_MJH_STRRIDE_S268_D_PRE_1_HG.U133_Plus_2_.CEL	normal	untrained	45 years	M	skeletal muscle	quadriceps	Asian
E-GEOD-48278	12/06/08	GSM1174108_MJH_STRRIDE_S268_D_POST_1_HG-U133_Plus_2_.CEL	GSM1174108_MJH_STRRIDE_S268_D_POST_1_HG.U133_Plus_2_.CEL	normal	trained	45 years	M	skeletal muscle	quadriceps	Asian	D (Moderate aerobic exercise)
E-GEOD-48278	11/25/08	GSM1174107_MJH_STRRIDE_S257_D_PRE_1_HG-U133_Plus_2_.CEL	GSM1174107_MJH_STRRIDE_S257_D_PRE_1_HG.U133_Plus_2_.CEL	normal	untrained	41 years	M	skeletal muscle	quadriceps	Caucasian
E-GEOD-48278	01/09/09	GSM1174105_MJH_STRRIDE_S247_A_PRE_1_HG-U133_Plus_2_.CEL	GSM1174105_MJH_STRRIDE_S247_A_PRE_1_HG.U133_Plus_2_.CEL	normal	untrained	57 years	F	skeletal muscle	quadriceps	Caucasian
E-GEOD-48278	01/09/09	GSM1174104_MJH_STRRIDE_S247_A_POST_1_HG-U133_Plus_2_.CEL	GSM1174104_MJH_STRRIDE_S247_A_POST_1_HG.U133_Plus_2_.CEL	normal	trained	57 years	F	skeletal muscle	quadriceps	Caucasian	A (Mild aerobic exercise)
E-GEOD-48278	12/05/08	GSM1174103_MJH_STRRIDE_S243_A_PRE_1_HG-U133_Plus_2_.CEL	GSM1174103_MJH_STRRIDE_S243_A_PRE_1_HG.U133_Plus_2_.CEL	normal	untrained	55 years	M	skeletal muscle	quadriceps	Caucasian
E-GEOD-48278	12/05/08	GSM1174102_MJH_STRRIDE_S243_A_POST_1_HG-U133_Plus_2_.CEL	GSM1174102_MJH_STRRIDE_S243_A_POST_1_HG.U133_Plus_2_.CEL	normal	trained	55 years	M	skeletal muscle	quadriceps	Caucasian	A (Mild aerobic exercise)
E-GEOD-48278	12/06/08	GSM1174101_MJH_STRRIDE_S242_D_PRE_1_HG-U133_Plus_2_.CEL	GSM1174101_MJH_STRRIDE_S242_D_PRE_1_HG.U133_Plus_2_.CEL	normal	untrained	44 years	F	skeletal muscle	quadriceps	Caucasian
E-GEOD-48278	12/06/08	GSM1174100_MJH_STRRIDE_S242_D_POST_1_HG-U133_Plus_2_.CEL	GSM1174100_MJH_STRRIDE_S242_D_POST_1_HG.U133_Plus_2_.CEL	normal	trained	44 years	F	skeletal muscle	quadriceps	Caucasian	D (Moderate aerobic exercise)
E-GEOD-48278	03/04/09	GSM1174099_MJH_STRRIDE_S240_A_PRE_1_HG-U133_Plus_2_.CEL	GSM1174099_MJH_STRRIDE_S240_A_PRE_1_HG.U133_Plus_2_.CEL	normal	untrained	63 years	F	skeletal muscle	quadriceps	Caucasian
E-GEOD-48278	03/04/09	GSM1174098_MJH_STRRIDE_S240_A_POST_1_HG-U133_Plus_2_.CEL	GSM1174098_MJH_STRRIDE_S240_A_POST_1_HG.U133_Plus_2_.CEL	normal	trained	63 years	F	skeletal muscle	quadriceps	Caucasian	A (Mild aerobic exercise)
E-GEOD-48278	11/24/08	GSM1174097_MJH_STRRIDE_S235_C_PRE_1_HG-U133_Plus_2_.CEL	GSM1174097_MJH_STRRIDE_S235_C_PRE_1_HG.U133_Plus_2_.CEL	normal	untrained	48 years	F	skeletal muscle	quadriceps	Caucasian
E-GEOD-48278	11/24/08	GSM1174095_MJH_STRRIDE_S230_C_PRE_1_HG-U133_Plus_2_.CEL	GSM1174095_MJH_STRRIDE_S230_C_PRE_1_HG.U133_Plus_2_.CEL	normal	untrained	60 years	F	skeletal muscle	quadriceps	Caucasian
E-GEOD-48278		GSM1174094_MJH_STRRIDE_S230_C_POST_1_HG-U133_Plus_2_.CEL	GSM1174094_MJH_STRRIDE_S230_C_POST_1_HG.U133_Plus_2_.CEL	normal	trained	60 years	F	skeletal muscle	quadriceps	Caucasian	C (High aerobic exercise)
E-GEOD-48278	11/24/08	GSM1174093_MJH_STRRIDE_S226_B_PRE_1_HG-U133_Plus_2_.CEL	GSM1174093_MJH_STRRIDE_S226_B_PRE_1_HG.U133_Plus_2_.CEL	normal	untrained	40 years	M	skeletal muscle	quadriceps	Caucasian
E-GEOD-48278	11/24/08	GSM1174092_MJH_STRRIDE_S226_B_POST_1_HG-U133_Plus_2_.CEL	GSM1174092_MJH_STRRIDE_S226_B_POST_1_HG.U133_Plus_2_.CEL	normal	untrained	40 years	M	skeletal muscle	quadriceps	Caucasian
E-GEOD-48278	11/24/08	GSM1174091_MJH_STRRIDE_S223_B_PRE_1_HG-U133_Plus_2_.CEL	GSM1174091_MJH_STRRIDE_S223_B_PRE_1_HG.U133_Plus_2_.CEL	normal	untrained	64 years	F	skeletal muscle	quadriceps	Caucasian
E-GEOD-48278	11/24/08	GSM1174090_MJH_STRRIDE_S223_B_POST_1_HG-U133_Plus_2_.CEL	GSM1174090_MJH_STRRIDE_S223_B_POST_1_HG.U133_Plus_2_.CEL	normal	untrained	64 years	F	skeletal muscle	quadriceps	Caucasian
E-GEOD-48278	03/04/09	GSM1174089_MJH_STRRIDE_S215_C_PRE_1_HG-U133_Plus_2_.CEL	GSM1174089_MJH_STRRIDE_S215_C_PRE_1_HG.U133_Plus_2_.CEL	normal	untrained	54 years	F	skeletal muscle	quadriceps	Caucasian
E-GEOD-48278	03/04/09	GSM1174088_MJH_STRRIDE_S215_C_POST_1_HG-U133_Plus_2_.CEL	GSM1174088_MJH_STRRIDE_S215_C_POST_1_HG.U133_Plus_2_.CEL	normal	trained	54 years	F	skeletal muscle	quadriceps	Caucasian	C (High aerobic exercise)
E-GEOD-48278	03/04/09	GSM1174087_MJH_STRRIDE_S206_B_PRE_1_HG-U133_Plus_2_.CEL	GSM1174087_MJH_STRRIDE_S206_B_PRE_1_HG.U133_Plus_2_.CEL	normal	untrained	56 years	F	skeletal muscle	quadriceps	Caucasian
E-GEOD-48278	03/04/09	GSM1174086_MJH_STRRIDE_S206_B_POST_1_HG-U133_Plus_2_.CEL	GSM1174086_MJH_STRRIDE_S206_B_POST_1_HG.U133_Plus_2_.CEL	normal	untrained	56 years	F	skeletal muscle	quadriceps	Caucasian
E-GEOD-48278	01/09/09	GSM1174085_MJH_STRRIDE_S199_C_PRE_1_HG-U133_Plus_2_.CEL	GSM1174085_MJH_STRRIDE_S199_C_PRE_1_HG.U133_Plus_2_.CEL	normal	untrained	50 years	M	skeletal muscle	quadriceps	Caucasian
E-GEOD-48278	01/09/09	GSM1174084_MJH_STRRIDE_S199_C_POST_1_HG-U133_Plus_2_.CEL	GSM1174084_MJH_STRRIDE_S199_C_POST_1_HG.U133_Plus_2_.CEL	normal	trained	50 years	M	skeletal muscle	quadriceps	Caucasian	C (High aerobic exercise)
E-GEOD-48278	01/09/09	GSM1174083_MJH_STRRIDE_S198_B_PRE_1_HG-U133_Plus_2_.CEL	GSM1174083_MJH_STRRIDE_S198_B_PRE_1_HG.U133_Plus_2_.CEL	normal	untrained	40 years	M	skeletal muscle	quadriceps	Caucasian
E-GEOD-48278	01/09/09	GSM1174082_MJH_STRRIDE_S198_B_POST_1_HG-U133_Plus_2_.CEL	GSM1174082_MJH_STRRIDE_S198_B_POST_1_HG.U133_Plus_2_.CEL	normal	untrained	40 years	M	skeletal muscle	quadriceps	Caucasian
E-GEOD-48278	11/07/08	GSM1174081_MJH_STRRIDE_S192_D_PRE_1_HG-U133_Plus_2_.CEL	GSM1174081_MJH_STRRIDE_S192_D_PRE_1_HG.U133_Plus_2_.CEL	normal	untrained	55 years	F	skeletal muscle	quadriceps	Caucasian
E-GEOD-48278	11/07/08	GSM1174080_MJH_STRRIDE_S192_D_POST_1_HG-U133_Plus_2_.CEL	GSM1174080_MJH_STRRIDE_S192_D_POST_1_HG.U133_Plus_2_.CEL	normal	trained	55 years	F	skeletal muscle	quadriceps	Caucasian	D (Moderate aerobic exercise)
E-GEOD-48278	11/07/08	GSM1174079_MJH_STRRIDE_S189_C_PRE_1_HG-U133_Plus_2_.CEL	GSM1174079_MJH_STRRIDE_S189_C_PRE_1_HG.U133_Plus_2_.CEL	normal	untrained	56 years	M	skeletal muscle	quadriceps	Caucasian
E-GEOD-48278	11/07/08	GSM1174078_MJH_STRRIDE_S189_C_POST_1_HG-U133_Plus_2_.CEL	GSM1174078_MJH_STRRIDE_S189_C_POST_1_HG.U133_Plus_2_.CEL	normal	trained	56 years	M	skeletal muscle	quadriceps	Caucasian	C (High aerobic exercise)
E-GEOD-48278	11/24/08	GSM1174077_MJH_STRRIDE_S187_A_PRE_1_HG-U133_Plus_2_.CEL	GSM1174077_MJH_STRRIDE_S187_A_PRE_1_HG.U133_Plus_2_.CEL	normal	untrained	63 years	F	skeletal muscle	quadriceps	Caucasian
E-GEOD-48278	11/24/08	GSM1174076_MJH_STRRIDE_S187_A_POST_1_HG-U133_Plus_2_.CEL	GSM1174076_MJH_STRRIDE_S187_A_POST_1_HG.U133_Plus_2_.CEL	normal	trained	63 years	F	skeletal muscle	quadriceps	Caucasian	A (Mild aerobic exercise)
E-GEOD-48278	11/07/08	GSM1174075_MJH_STRRIDE_S185_B_PRE_1_HG-U133_Plus_2_.CEL	GSM1174075_MJH_STRRIDE_S185_B_PRE_1_HG.U133_Plus_2_.CEL	normal	untrained	47 years	M	skeletal muscle	quadriceps	Caucasian
E-GEOD-48278	11/07/08	GSM1174074_MJH_STRRIDE_S185_B_POST_1_HG-U133_Plus_2_.CEL	GSM1174074_MJH_STRRIDE_S185_B_POST_1_HG.U133_Plus_2_.CEL	normal	untrained	47 years	M	skeletal muscle	quadriceps	Caucasian
E-GEOD-48278	01/09/09	GSM1174073_MJH_STRRIDE_S182_D_PRE_1_HG-U133_Plus_2_.CEL	GSM1174073_MJH_STRRIDE_S182_D_PRE_1_HG.U133_Plus_2_.CEL	normal	untrained	46 years	M	skeletal muscle	quadriceps	Caucasian
E-GEOD-48278	01/09/09	GSM1174072_MJH_STRRIDE_S182_D_POST_1_HG-U133_Plus_2_.CEL	GSM1174072_MJH_STRRIDE_S182_D_POST_1_HG.U133_Plus_2_.CEL	normal	trained	46 years	M	skeletal muscle	quadriceps	Caucasian	D (Moderate aerobic exercise)
E-GEOD-48278	11/24/08	GSM1174071_MJH_STRRIDE_S180_A_PRE_1_HG-U133_Plus_2_.CEL	GSM1174071_MJH_STRRIDE_S180_A_PRE_1_HG.U133_Plus_2_.CEL	normal	untrained	46 years	M	skeletal muscle	quadriceps	Caucasian
E-GEOD-48278	11/24/08	GSM1174070_MJH_STRRIDE_S180_A_POST_1_HG-U133_Plus_2_.CEL	GSM1174070_MJH_STRRIDE_S180_A_POST_1_HG.U133_Plus_2_.CEL	normal	trained	46 years	M	skeletal muscle	quadriceps	Caucasian	A (Mild aerobic exercise)
E-GEOD-48278	11/06/08	GSM1174069_MJH_STRRIDE_S179_C_PRE_1_HG-U133_Plus_2_.CEL	GSM1174069_MJH_STRRIDE_S179_C_PRE_1_HG.U133_Plus_2_.CEL	normal	untrained	53 years	F	skeletal muscle	quadriceps	Caucasian
E-GEOD-48278	11/06/08	GSM1174068_MJH_STRRIDE_S179_C_POST_1_HG-U133_Plus_2_.CEL	GSM1174068_MJH_STRRIDE_S179_C_POST_1_HG.U133_Plus_2_.CEL	normal	trained	53 years	F	skeletal muscle	quadriceps	Caucasian	C (High aerobic exercise)
E-GEOD-48278	11/06/08	GSM1174067_MJH_STRRIDE_S177_D_PRE_1_HG-U133_Plus_2_.CEL	GSM1174067_MJH_STRRIDE_S177_D_PRE_1_HG.U133_Plus_2_.CEL	normal	untrained	45 years	F	skeletal muscle	quadriceps	African American
E-GEOD-48278	11/06/08	GSM1174066_MJH_STRRIDE_S177_D_POST_1_HG-U133_Plus_2_.CEL	GSM1174066_MJH_STRRIDE_S177_D_POST_1_HG.U133_Plus_2_.CEL	normal	trained	45 years	F	skeletal muscle	quadriceps	African American	D (Moderate aerobic exercise)
E-GEOD-48278	01/09/09	GSM1174065_MJH_STRRIDE_S176_A_PRE_1_HG-U133_Plus_2_.CEL	GSM1174065_MJH_STRRIDE_S176_A_PRE_1_HG.U133_Plus_2_.CEL	normal	untrained	51 years	M	skeletal muscle	quadriceps	African American
E-GEOD-48278	01/09/09	GSM1174064_MJH_STRRIDE_S176_A_POST_1_HG-U133_Plus_2_.CEL	GSM1174064_MJH_STRRIDE_S176_A_POST_1_HG.U133_Plus_2_.CEL	normal	trained	51 years	M	skeletal muscle	quadriceps	African American	A (Mild aerobic exercise)
E-GEOD-48278	11/06/08	GSM1174063_MJH_STRRIDE_S175_B_PRE_1_HG-U133_Plus_2_.CEL	GSM1174063_MJH_STRRIDE_S175_B_PRE_1_HG.U133_Plus_2_.CEL	normal	untrained	53 years	F	skeletal muscle	quadriceps	African American
E-GEOD-48278	11/06/08	GSM1174062_MJH_STRRIDE_S175_B_POST_1_HG-U133_Plus_2_.CEL	GSM1174062_MJH_STRRIDE_S175_B_POST_1_HG.U133_Plus_2_.CEL	normal	untrained	53 years	F	skeletal muscle	quadriceps	African American
E-GEOD-48278	11/07/08	GSM1174060_MJH_STRRIDE_S172_A_POST_1_HG-U133_Plus_2_.CEL	GSM1174060_MJH_STRRIDE_S172_A_POST_1_HG.U133_Plus_2_.CEL	normal	trained	52 years	F	skeletal muscle	quadriceps	Caucasian	A (Mild aerobic exercise)
E-GEOD-48278	10/28/08	GSM1174059_MJH_STRRIDE_S171_C_PRE_1_HG-U133_Plus_2_.CEL	GSM1174059_MJH_STRRIDE_S171_C_PRE_1_HG.U133_Plus_2_.CEL	normal	untrained	48 years	F	skeletal muscle	quadriceps	Caucasian
E-GEOD-48278	10/28/08	GSM1174058_MJH_STRRIDE_S171_C_POST_1_HG-U133_Plus_2_.CEL	GSM1174058_MJH_STRRIDE_S171_C_POST_1_HG.U133_Plus_2_.CEL	normal	trained	48 years	F	skeletal muscle	quadriceps	Caucasian	C (High aerobic exercise)
E-GEOD-48278	10/28/08	GSM1174057_MJH_STRRIDE_S167_D_PRE_1_HG-U133_Plus_2_.CEL	GSM1174057_MJH_STRRIDE_S167_D_PRE_1_HG.U133_Plus_2_.CEL	normal	untrained	65 years	F	skeletal muscle	quadriceps	Caucasian
E-GEOD-48278	10/28/08	GSM1174056_MJH_STRRIDE_S167_D_POST_1_HG-U133_Plus_2_.CEL	GSM1174056_MJH_STRRIDE_S167_D_POST_1_HG.U133_Plus_2_.CEL	normal	trained	65 years	F	skeletal muscle	quadriceps	Caucasian	D (Moderate aerobic exercise)
E-GEOD-48278	10/23/08	GSM1174055_MJH_STRRIDE_S162_D_PRE_1_HG-U133_Plus_2_.CEL	GSM1174055_MJH_STRRIDE_S162_D_PRE_1_HG.U133_Plus_2_.CEL	normal	untrained	64 years	F	skeletal muscle	quadriceps	Caucasian
E-GEOD-48278	10/23/08	GSM1174054_MJH_STRRIDE_S162_D_POST_1_HG-U133_Plus_2_.CEL	GSM1174054_MJH_STRRIDE_S162_D_POST_1_HG.U133_Plus_2_.CEL	normal	trained	64 years	F	skeletal muscle	quadriceps	Caucasian	D (Moderate aerobic exercise)
E-GEOD-48278	11/06/08	GSM1174052_MJH_STRRIDE_S156_A_POST_1_HG-U133_Plus_2_.CEL	GSM1174052_MJH_STRRIDE_S156_A_POST_1_HG.U133_Plus_2_.CEL	normal	trained	50 years	M	skeletal muscle	quadriceps	African American	A (Mild aerobic exercise)
E-GEOD-48278	10/23/08	GSM1174051_MJH_STRRIDE_S146_C_PRE_1_HG-U133_Plus_2_.CEL	GSM1174051_MJH_STRRIDE_S146_C_PRE_1_HG.U133_Plus_2_.CEL	normal	untrained	59 years	M	skeletal muscle	quadriceps	Caucasian
E-GEOD-48278	10/28/08	GSM1174049_MJH_STRRIDE_S145_B_PRE_1_HG-U133_Plus_2_.CEL	GSM1174049_MJH_STRRIDE_S145_B_PRE_1_HG.U133_Plus_2_.CEL	normal	untrained	53 years	F	skeletal muscle	quadriceps	Caucasian
E-GEOD-48278	10/28/08	GSM1174048_MJH_STRRIDE_S145_B_POST_1_HG-U133_Plus_2_.CEL	GSM1174048_MJH_STRRIDE_S145_B_POST_1_HG.U133_Plus_2_.CEL	normal	untrained	53 years	F	skeletal muscle	quadriceps	Caucasian
E-GEOD-48278	10/22/08	GSM1174047_MJH_STRRIDE_S144_B_PRE_1_HG-U133_Plus_2_.CEL	GSM1174047_MJH_STRRIDE_S144_B_PRE_1_HG.U133_Plus_2_.CEL	normal	untrained	53 years	F	skeletal muscle	quadriceps	Caucasian
E-GEOD-48278	10/22/08	GSM1174046_MJH_STRRIDE_S144_B_POST_1_HG-U133_Plus_2_.CEL	GSM1174046_MJH_STRRIDE_S144_B_POST_1_HG.U133_Plus_2_.CEL	normal	untrained	53 years	F	skeletal muscle	quadriceps	Caucasian
E-GEOD-48278	10/28/08	GSM1174045_MJH_STRRIDE_S139_A_PRE_1_HG-U133_Plus_2_.CEL	GSM1174045_MJH_STRRIDE_S139_A_PRE_1_HG.U133_Plus_2_.CEL	normal	untrained	54 years	M	skeletal muscle	quadriceps	Caucasian
E-GEOD-48278	10/28/08	GSM1174044_MJH_STRRIDE_S139_A_POST_1_HG-U133_Plus_2_.CEL	GSM1174044_MJH_STRRIDE_S139_A_POST_1_HG.U133_Plus_2_.CEL	normal	trained	54 years	M	skeletal muscle	quadriceps	Caucasian	A (Mild aerobic exercise)
E-GEOD-48278	10/22/08	GSM1174043_MJH_STRRIDE_S137_A_PRE_1_HG-U133_Plus_2_.CEL	GSM1174043_MJH_STRRIDE_S137_A_PRE_1_HG.U133_Plus_2_.CEL	normal	untrained	63 years	F	skeletal muscle	quadriceps	Caucasian
E-GEOD-48278	10/22/08	GSM1174042_MJH_STRRIDE_S137_A_POST_1_HG-U133_Plus_2_.CEL	GSM1174042_MJH_STRRIDE_S137_A_POST_1_HG.U133_Plus_2_.CEL	normal	trained	63 years	F	skeletal muscle	quadriceps	Caucasian	A (Mild aerobic exercise)
E-GEOD-48574	09/10/09	GSM1181426_SwedishSubject_3B.CEL	GSM1181426_SwedishSubject_3B.CEL	iron–sulfur cluster scaffold homolog (ISCU) myopathy patient		42 years	M	skeletal muscle	quadriceps	caucasian
E-GEOD-48574	09/10/09	GSM1181425_SwedishSubject_2B.CEL	GSM1181425_SwedishSubject_2B.CEL	iron–sulfur cluster scaffold homolog (ISCU) myopathy patient		42 years	M	skeletal muscle	quadriceps	caucasian
E-GEOD-48574	09/10/09	GSM1181424_SwedishSubject_1B.CEL	GSM1181424_SwedishSubject_1B.CEL	iron–sulfur cluster scaffold homolog (ISCU) myopathy patient		66 years	F	skeletal muscle	quadriceps	caucasian
E-GEOD-48574	09/10/09	GSM1181423_Control_5A.CEL	GSM1181423_Control_5A.CEL	normal		22 years	F	skeletal muscle	quadriceps	caucasian
E-GEOD-48574	09/10/09	GSM1181422_Control_4A.CEL	GSM1181422_Control_4A.CEL	normal		47 years	M	skeletal muscle	quadriceps	caucasian
E-GEOD-48574	09/10/09	GSM1181421_Control_3A.CEL	GSM1181421_Control_3A.CEL	normal		42 years	M	skeletal muscle	quadriceps	caucasian
E-GEOD-48574	09/10/09	GSM1181420_Control_2A.CEL	GSM1181420_Control_2A.CEL	normal		35 years	M	skeletal muscle	quadriceps	caucasian
E-GEOD-48574	09/10/09	GSM1181419_Control_1A.CEL	GSM1181419_Control_1A.CEL	normal		42 years	F	skeletal muscle	quadriceps	caucasian
E-GEOD-5109	05/12/04	GSM101300.CEL	GSM101300.CEL	morbid obesity		36 years	F	skeletal muscle	quadriceps
E-GEOD-5109	05/12/04	GSM101302.CEL	GSM101302.CEL	morbid obesity		36 years	F	skeletal muscle	quadriceps
E-GEOD-5109	05/12/04	GSM101299.CEL	GSM101299.CEL	morbid obesity		36 years	F	skeletal muscle	quadriceps
E-GEOD-5109	05/12/04	GSM101303.CEL	GSM101303.CEL	morbid obesity	post gastric bypass	36 years	F	skeletal muscle	quadriceps
E-GEOD-5109	05/12/04	GSM101301.CEL	GSM101301.CEL	morbid obesity	post gastric bypass	36 years	F	skeletal muscle	quadriceps
E-GEOD-5109	05/12/04	GSM101304.CEL	GSM101304.CEL	morbid obesity	post gastric bypass	36 years	F	skeletal muscle	quadriceps
E-GEOD-5110	06/11/04	GSM103558.CEL	GSM103558.CEL	post 48 hours immobilization		20 years	M	skeletal muscle	quadriceps
E-GEOD-5110	06/11/04	GSM103564.CEL	GSM103564.CEL	normal		20 years	M	skeletal muscle	quadriceps
E-GEOD-5110	06/11/04	GSM103563.CEL	GSM103563.CEL	normal		20 years	M	skeletal muscle	quadriceps
E-GEOD-5110	06/11/04	GSM103565.CEL	GSM103565.CEL	normal		20 years	M	skeletal muscle	quadriceps
E-GEOD-5110	06/11/04	GSM103562.CEL	GSM103562.CEL	post 48 hours immobilization		20 years	M	skeletal muscle	quadriceps
E-GEOD-5110	06/11/04	GSM103559.CEL	GSM103559.CEL	normal		20 years	M	skeletal muscle	quadriceps
E-GEOD-5110	06/11/04	GSM103561.CEL	GSM103561.CEL	post 48 hours immobilization		20 years	M	skeletal muscle	quadriceps
E-GEOD-5110	06/11/04	GSM104050.CEL	GSM104050.CEL	post 48 hours immobilization		20 years	M	skeletal muscle	quadriceps
E-GEOD-5110	06/11/04	GSM103560.CEL	GSM103560.CEL	normal		20 years	M	skeletal muscle	quadriceps
E-GEOD-5110	06/11/04	GSM103557.CEL	GSM103557.CEL	post 48 hours immobilization		20 years	M	skeletal muscle	quadriceps
E-GEOD-55034	12/21/12	GSM1328180_day15_HG-U133_Plus_2_.CEL	GSM1328180_day15_HG.U133_Plus_2_.CEL	normal		15 days differentiation	M	myoblast		caucasian	7 years
E-GEOD-55034	12/21/12	GSM1328179_day8_HG-U133_Plus_2_.CEL	GSM1328179_day8_HG.U133_Plus_2_.CEL	normal		8 days differentiation	M	myoblast		caucasian	7 years
E-GEOD-55034	12/21/12	GSM1328178_day3_HG-U133_Plus_2_.CEL	GSM1328178_day3_HG.U133_Plus_2_.CEL	normal		3 days differentiation	M	myoblast		caucasian	7 years
E-GEOD-55034	12/21/12	GSM1328177_day1_HG-U133_Plus_2_.CEL	GSM1328177_day1_HG.U133_Plus_2_.CEL	normal		undifferentiated	M	myoblast		caucasian	7 years
E-GEOD-60291	05/24/13	GSM1470352_iPS_012513_ET1.CEL	GSM1470352_iPS_012513_ET1.CEL	endothelin 1 (ET-1) stimulation			F	hiPSC-cardiomyocyte
E-GEOD-60291	05/24/13	GSM1470351_iPS_012513_Unstim.CEL	GSM1470351_iPS_012513_Unstim.CEL	normal			F	hiPSC-cardiomyocyte
E-GEOD-60291	05/24/13	GSM1470350_iPS_011013_ET1.CEL	GSM1470350_iPS_011013_ET1.CEL	endothelin 1 (ET-1) stimulation			F	hiPSC-cardiomyocyte
E-GEOD-60291	05/24/13	GSM1470349_iPS_011013_Unstim.CEL	GSM1470349_iPS_011013_Unstim.CEL	normal			F	hiPSC-cardiomyocyte
E-GEOD-60291	05/24/13	GSM1470348_iPS_010313_ET1.CEL	GSM1470348_iPS_010313_ET1.CEL	endothelin 1 (ET-1) stimulation			F	hiPSC-cardiomyocyte
E-GEOD-60291	05/24/13	GSM1470347_iPS_010313_Unstim.CEL	GSM1470347_iPS_010313_Unstim.CEL	normal			F	hiPSC-cardiomyocyte
E-GEOD-6798	09/28/05	GSM156176.cel	GSM156176.cel	normal		35 years	F	skeletal muscle	quadriceps
E-GEOD-6798	09/07/05	GSM156177.cel	GSM156177.cel	normal		35 years	F	skeletal muscle	quadriceps
E-GEOD-6798	09/29/05	GSM156178.cel	GSM156178.cel	normal		35 years	F	skeletal muscle	quadriceps
E-GEOD-6798	09/29/05	GSM156179.cel	GSM156179.cel	normal		35 years	F	skeletal muscle	quadriceps
E-GEOD-6798	10/05/05	GSM156180.cel	GSM156180.cel	normal		35 years	F	skeletal muscle	quadriceps
E-GEOD-6798	10/05/05	GSM156181.cel	GSM156181.cel	normal		35 years	F	skeletal muscle	quadriceps
E-GEOD-6798	09/29/05	GSM156184.cel	GSM156184.cel	normal		35 years	F	skeletal muscle	quadriceps
E-GEOD-6798	09/07/05	GSM155643.cel	GSM155643.cel	normal		35 years	F	skeletal muscle	quadriceps
E-GEOD-6798	08/18/05	GSM155631.cel	GSM155631.cel	normal		35 years	F	skeletal muscle	quadriceps
E-GEOD-6798	09/07/05	GSM155644.cel	GSM155644.cel	normal		35 years	F	skeletal muscle	quadriceps
E-GEOD-6798	09/29/05	GSM155729.cel	GSM155729.cel	normal		35 years	F	skeletal muscle	quadriceps
E-GEOD-6798	09/28/05	GSM156170.cel	GSM156170.cel	normal		35 years	F	skeletal muscle	quadriceps
E-GEOD-6798	09/07/05	GSM156171.cel	GSM156171.cel	normal		35 years	F	skeletal muscle	quadriceps
E-GEOD-6798	10/05/05	GSM156186.cel	GSM156186.cel	insulin resistant	polycystic ovary syndrome (PCOS)	31 years	F	skeletal muscle	quadriceps
E-GEOD-6798	08/18/05	GSM156749.cel	GSM156749.cel	insulin resistant	polycystic ovary syndrome (PCOS)	31 years	F	skeletal muscle	quadriceps
E-GEOD-6798	10/05/05	GSM156750.cel	GSM156750.cel	insulin resistant	polycystic ovary syndrome (PCOS)	31 years	F	skeletal muscle	quadriceps
E-GEOD-6798	09/07/05	GSM156751.cel	GSM156751.cel	insulin resistant	polycystic ovary syndrome (PCOS)	31 years	F	skeletal muscle	quadriceps
E-GEOD-6798	09/29/05	GSM156752.cel	GSM156752.cel	insulin resistant	polycystic ovary syndrome (PCOS)	31 years	F	skeletal muscle	quadriceps
E-GEOD-6798	09/29/05	GSM156753.cel	GSM156753.cel	insulin resistant	polycystic ovary syndrome (PCOS)	31 years	F	skeletal muscle	quadriceps
E-GEOD-6798	09/28/05	GSM156763.cel	GSM156763.cel	insulin resistant	polycystic ovary syndrome (PCOS)	31 years	F	skeletal muscle	quadriceps
E-GEOD-6798	09/28/05	GSM156946.cel	GSM156946.cel	insulin resistant	polycystic ovary syndrome (PCOS)	31 years	F	skeletal muscle	quadriceps
E-GEOD-6798	10/05/05	GSM156948.cel	GSM156948.cel	insulin resistant	polycystic ovary syndrome (PCOS)	31 years	F	skeletal muscle	quadriceps
E-GEOD-6798	09/28/05	GSM156949.cel	GSM156949.cel	insulin resistant	polycystic ovary syndrome (PCOS)	31 years	F	skeletal muscle	quadriceps
E-GEOD-6798	09/07/05	GSM156950.cel	GSM156950.cel	insulin resistant	polycystic ovary syndrome (PCOS)	31 years	F	skeletal muscle	quadriceps
E-GEOD-6798	09/28/05	GSM156951.cel	GSM156951.cel	insulin resistant	polycystic ovary syndrome (PCOS)	31 years	F	skeletal muscle	quadriceps
E-GEOD-6798	08/18/05	GSM156187.cel	GSM156187.cel	insulin resistant	polycystic ovary syndrome (PCOS)	31 years	F	skeletal muscle	quadriceps
E-GEOD-6798	09/07/05	GSM156510.cel	GSM156510.cel	insulin resistant	polycystic ovary syndrome (PCOS)	31 years	F	skeletal muscle	quadriceps
E-GEOD-6798	10/05/05	GSM156511.cel	GSM156511.cel	insulin resistant	polycystic ovary syndrome (PCOS)	31 years	F	skeletal muscle	quadriceps
E-GEOD-6798	09/07/05	GSM156512.cel	GSM156512.cel	insulin resistant	polycystic ovary syndrome (PCOS)	31 years	F	skeletal muscle	quadriceps
E-GEOD-68231	05/28/09	GSM1666071_LR5_post.CEL	GSM1666071_LR5_post.CEL	fat-diet 3 days	low responder group		M	skeletal muscle	quadriceps
E-GEOD-68231	05/28/09	GSM1666070_LR5_pre.CEL	GSM1666070_LR5_pre.CEL	normal	low responder group		M	skeletal muscle	quadriceps
E-GEOD-68231	05/28/09	GSM1666069_LR4_post.CEL	GSM1666069_LR4_post.CEL	fat-diet 3 days	low responder group		M	skeletal muscle	quadriceps
E-GEOD-68231	05/28/09	GSM1666068_LR4_pre.CEL	GSM1666068_LR4_pre.CEL	normal	low responder group		M	skeletal muscle	quadriceps
E-GEOD-68231	05/28/09	GSM1666067_LR3_post.CEL	GSM1666067_LR3_post.CEL	fat-diet 3 days	low responder group		M	skeletal muscle	quadriceps
E-GEOD-68231	05/28/09	GSM1666066_LR3_pre.CEL	GSM1666066_LR3_pre.CEL	normal	low responder group		M	skeletal muscle	quadriceps
E-GEOD-68231	05/28/09	GSM1666065_LR2_post.CEL	GSM1666065_LR2_post.CEL	fat-diet 3 days	low responder group		M	skeletal muscle	quadriceps
E-GEOD-68231	05/28/09	GSM1666064_LR2_pre.CEL	GSM1666064_LR2_pre.CEL	normal	low responder group		M	skeletal muscle	quadriceps
E-GEOD-68231	03/16/09	GSM1666063_LR1_post.CEL	GSM1666063_LR1_post.CEL	fat-diet 3 days	low responder group		M	skeletal muscle	quadriceps
E-GEOD-68231	03/16/09	GSM1666062_LR1_pre.CEL	GSM1666062_LR1_pre.CEL	normal	low responder group		M	skeletal muscle	quadriceps
E-GEOD-68231	05/28/09	GSM1666061_HR5_post.CEL	GSM1666061_HR5_post.CEL	fat-diet 3 days	high responder group		M	skeletal muscle	quadriceps
E-GEOD-68231	05/28/09	GSM1666060_HR5_pre.CEL	GSM1666060_HR5_pre.CEL	normal	high responder group		M	skeletal muscle	quadriceps
E-GEOD-68231	05/28/09	GSM1666059_HR4_post.CEL	GSM1666059_HR4_post.CEL	fat-diet 3 days	high responder group		M	skeletal muscle	quadriceps
E-GEOD-68231	05/28/09	GSM1666058_HR4_pre.CEL	GSM1666058_HR4_pre.CEL	normal	high responder group		M	skeletal muscle	quadriceps
E-GEOD-68231	03/16/09	GSM1666057_HR3_post.CEL	GSM1666057_HR3_post.CEL	fat-diet 3 days	high responder group		M	skeletal muscle	quadriceps
E-GEOD-68231	03/16/09	GSM1666056_HR3_pre.CEL	GSM1666056_HR3_pre.CEL	normal	high responder group		M	skeletal muscle	quadriceps
E-GEOD-68231	03/16/09	GSM1666055_HR2_post.CEL	GSM1666055_HR2_post.CEL	fat-diet 3 days	high responder group		M	skeletal muscle	quadriceps
E-GEOD-68231	03/16/09	GSM1666054_HR2_pre.CEL	GSM1666054_HR2_pre.CEL	normal	high responder group		M	skeletal muscle	quadriceps
E-GEOD-68231	03/16/09	GSM1666053_HR1_post.CEL	GSM1666053_HR1_post.CEL	fat-diet 3 days	high responder group		M	skeletal muscle	quadriceps
E-GEOD-68231	03/16/09	GSM1666052_HR1_pre.CEL	GSM1666052_HR1_pre.CEL	normal	high responder group		M	skeletal muscle	quadriceps
E-GEOD-7014	03/08/05	GSM161971.CEL	GSM161971.CEL	normal		44 years	mixed	skeletal muscle	wna
E-GEOD-7014	03/15/05	GSM161969.CEL	GSM161969.CEL	normal		43 years	M	skeletal muscle	wna
E-GEOD-7014	03/16/05	GSM161968.CEL	GSM161968.CEL	normal		43 years	M	skeletal muscle	wna
E-GEOD-7014	12/07/04	GSM161967.CEL	GSM161967.CEL	normal		85 years	M	skeletal muscle	wna
E-GEOD-7014	03/08/05	GSM161966.CEL	GSM161966.CEL	normal		61 years	F	skeletal muscle	wna
E-GEOD-7014	03/08/05	GSM161965.CEL	GSM161965.CEL	Myotonic dystrophy type 2 (DM2) patient		55 years	F	skeletal muscle	wna
E-GEOD-7014	03/15/05	GSM161964.CEL	GSM161964.CEL	Myotonic dystrophy type 2 (DM2) patient		51 years	M	skeletal muscle	wna
E-GEOD-7014	03/16/05	GSM161963.CEL	GSM161963.CEL	Myotonic dystrophy type 2 (DM2) patient		58 years	F	skeletal muscle	wna
E-GEOD-7014	03/16/05	GSM161962.CEL	GSM161962.CEL	Myotonic dystrophy type 2 (DM2) patient		51 years	F	skeletal muscle	wna
E-GEOD-7014	03/16/05	GSM161961.CEL	GSM161961.CEL	Myotonic dystrophy type 2 (DM2) patient		50 years	F	skeletal muscle	wna
E-GEOD-7014	03/08/05	GSM161960.CEL	GSM161960.CEL	Myotonic dystrophy type 2 (DM2) patient		42 years	F	skeletal muscle	wna
E-GEOD-7014	03/16/05	GSM161959.CEL	GSM161959.CEL	Myotonic dystrophy type 2 (DM2) patient		65 years	F	skeletal muscle	wna
E-GEOD-7014	03/15/05	GSM161958.CEL	GSM161958.CEL	Myotonic dystrophy type 2 (DM2) patient		43 years	F	skeletal muscle	wna
E-GEOD-7014	12/07/04	GSM161957.CEL	GSM161957.CEL	Myotonic dystrophy type 2 (DM2) patient		54 years	M	skeletal muscle	quadriceps
E-GEOD-7014	12/07/04	GSM161956.CEL	GSM161956.CEL	Myotonic dystrophy type 2 (DM2) patient		47 years	M	skeletal muscle	quadriceps
E-GEOD-7014	12/07/04	GSM161955.CEL	GSM161955.CEL	Myotonic dystrophy type 2 (DM2) patient		37 years	F	skeletal muscle	quadriceps
E-GEOD-7014	12/07/04	GSM161954.CEL	GSM161954.CEL	Myotonic dystrophy type 2 (DM2) patient		43 years	F	skeletal muscle	quadriceps
E-GEOD-7014	12/07/04	GSM161953.CEL	GSM161953.CEL	Myotonic dystrophy type 2 (DM2) patient		57 years	F	skeletal muscle	quadriceps
E-GEOD-7014	08/25/04	GSM161952.CEL	GSM161952.CEL	Myotonic dystrophy type 2 (DM2) patient		47 years	F	skeletal muscle	deltoid
E-GEOD-7014	08/25/04	GSM161951.CEL	GSM161951.CEL	Myotonic dystrophy type 2 (DM2) patient		32 years	M	skeletal muscle	deltoid
E-GEOD-7014	07/08/04	GSM161950.CEL	GSM161950.CEL	Myotonic dystrophy type 2 (DM2) patient		68 years	M	skeletal muscle	deltoid
E-GEOD-7014	07/08/04	GSM161949.CEL	GSM161949.CEL	Myotonic dystrophy type 2 (DM2) patient			M	skeletal muscle	Biceps Brachii
E-GEOD-7014	06/25/04	GSM161948.CEL	GSM161948.CEL	Myotonic dystrophy type 2 (DM2) patient		69 years	M	skeletal muscle	Quadriceps
E-GEOD-7014	03/08/05	GSM161946.CEL	GSM161946.CEL	Myotonic dystrophy type 2 (DM2) patient		39 years	M	skeletal muscle	Biceps Brachii
E-GEOD-7014	07/07/04	GSM161945.CEL	GSM161945.CEL	Myotonic dystrophy type 2 (DM2) patient		71 years	F	skeletal muscle	Biceps Brachii
E-GEOD-7014	03/25/05	GSM161942.CEL	GSM161942.CEL	Myotonic dystrophy type 1 (DM1) patient		29 years	F	skeletal muscle	Biceps Brachii
E-GEOD-7014	03/25/05	GSM161941.CEL	GSM161941.CEL	Myotonic dystrophy type 1 (DM1) patient		25 years	M	skeletal muscle	wna
E-GEOD-7014	03/25/05	GSM161940.CEL	GSM161940.CEL	Myotonic dystrophy type 1 (DM1) patient		54 years	F	skeletal muscle	wna
E-GEOD-7014	04/27/05	GSM161939.CEL	GSM161939.CEL	Myotonic dystrophy type 1 (DM1) patient			M	skeletal muscle	wna
E-GEOD-7014	07/08/04	GSM161938.CEL	GSM161938.CEL	Myotonic dystrophy type 1 (DM1) patient		55 years	F	skeletal muscle	deltoid
E-GEOD-7014	07/07/04	GSM161937.CEL	GSM161937.CEL	Myotonic dystrophy type 1 (DM1) patient			F	skeletal muscle	deltoid
E-GEOD-7014	07/08/04	GSM161936.CEL	GSM161936.CEL	Myotonic dystrophy type 1 (DM1) patient			F	skeletal muscle	Biceps Brachii
E-GEOD-7014	07/07/04	GSM161935.CEL	GSM161935.CEL	Myotonic dystrophy type 1 (DM1) patient			F	skeletal muscle	Biceps Brachii
E-GEOD-7307	11/04/05	GSM176315.CEL	GSM176315.CEL	normal		adult	F	skeletal muscle	deltoid
E-GEOD-7307	11/04/05	GSM176317.CEL	GSM176317.CEL	normal		adult	F	skeletal muscle	deltoid
E-GEOD-7307	11/04/05	GSM176312.CEL	GSM176312.CEL	normal		adult	F	skeletal muscle	deltoid
E-GEOD-7307	11/04/05	GSM176301.CEL	GSM176301.CEL	normal		adult	F	skeletal muscle	deltoid
E-GEOD-7307	11/04/05	GSM176313.CEL	GSM176313.CEL	normal		adult	M	skeletal muscle	deltoid
E-GEOD-7307	11/04/05	GSM176310.CEL	GSM176310.CEL	normal		adult	F	skeletal muscle	deltoid
E-GEOD-7307	01/11/04	GSM175935.CEL	GSM175935.CEL	normal		adult	mixed	heart	myocardium
E-GEOD-7307	01/29/04	GSM175985.CEL	GSM175985.CEL	normal		adult	M	skeletal muscle	quadriceps
E-GEOD-7307	01/11/04	GSM175940.CEL	GSM175940.CEL	normal		adult	mixed	skeletal muscle	quadriceps
E-GEOD-7307	01/11/04	GSM175953.CEL	GSM175953.CEL	normal		adult	F	skeletal muscle	tongue
E-GEOD-7307	01/11/04	GSM175946.CEL	GSM175946.CEL	normal		adult	mixed	skeletal muscle	tongue
E-GEOD-7307		GSM176302.CEL	GSM176302.CEL	neuromuscular pain		adult	F	skeletal muscle	paravertebral muscle
E-GEOD-7307		GSM176303.CEL	GSM176303.CEL	neuromuscular pain		adult	F	skeletal muscle	paravertebral muscle
E-GEOD-7307		GSM176304.CEL	GSM176304.CEL	neuromuscular pain		adult	M	skeletal muscle	paravertebral muscle
E-GEOD-7307		GSM176305.CEL	GSM176305.CEL	neuromuscular pain		adult	M	skeletal muscle	paravertebral muscle
E-GEOD-7307		GSM176306.CEL	GSM176306.CEL	neuromuscular pain		adult	M	skeletal muscle	paravertebral muscle
E-GEOD-7307		GSM176307.CEL	GSM176307.CEL	neuromuscular pain		adult	F	skeletal muscle	paravertebral muscle
E-GEOD-7307		GSM176308.CEL	GSM176308.CEL	neuromuscular pain		adult	F	skeletal muscle	paravertebral muscle
E-GEOD-7307		GSM176309.CEL	GSM176309.CEL	neuromuscular pain		adult	F	skeletal muscle	paravertebral muscle
E-GEOD-7307		GSM176311.CEL	GSM176311.CEL	neuromuscular pain		adult	F	skeletal muscle	paravertebral muscle
E-GEOD-7307		GSM176314.CEL	GSM176314.CEL	neuromuscular pain		adult	F	skeletal muscle	paravertebral muscle
E-GEOD-7307		GSM176316.CEL	GSM176316.CEL	neuromuscular pain		adult	F	skeletal muscle	paravertebral muscle
E-GEOD-76701	05/11/11	GSM2035931_Westfall_008_HG-U133_Plus_2_.CEL	GSM2035931_Westfall_008_HG.U133_Plus_2_.CEL	ischemic cardiomyopathy	failing		M	heart	left ventricle
E-GEOD-76701	05/11/11	GSM2035930_Westfall_007_HG-U133_Plus_2_.CEL	GSM2035930_Westfall_007_HG.U133_Plus_2_.CEL	ischemic cardiomyopathy	failing		M	heart	left ventricle
E-GEOD-76701	05/11/11	GSM2035929_Westfall_006_HG-U133_Plus_2_.CEL	GSM2035929_Westfall_006_HG.U133_Plus_2_.CEL	ischemic cardiomyopathy	failing		M	heart	left ventricle
E-GEOD-76701	05/11/11	GSM2035928_Westfall_005_HG-U133_Plus_2_.CEL	GSM2035928_Westfall_005_HG.U133_Plus_2_.CEL	ischemic cardiomyopathy	failing		F	heart	left ventricle
E-GEOD-76701	05/11/11	GSM2035927_Westfall_004_HG-U133_Plus_2_.CEL	GSM2035927_Westfall_004_HG.U133_Plus_2_.CEL	normal			F	heart	left ventricle
E-GEOD-76701	05/11/11	GSM2035926_Westfall_003_HG-U133_Plus_2_.CEL	GSM2035926_Westfall_003_HG.U133_Plus_2_.CEL	normal			F	heart	left ventricle
E-GEOD-76701	05/11/11	GSM2035925_Westfall_002_HG-U133_Plus_2_.CEL	GSM2035925_Westfall_002_HG.U133_Plus_2_.CEL	normal			F	heart	left ventricle
E-GEOD-76701	05/11/11	GSM2035924_Westfall_001_HG-U133_Plus_2_.CEL	GSM2035924_Westfall_001_HG.U133_Plus_2_.CEL	normal			F	heart	left ventricle
E-GEOD-8331	01/16/07	GSM206436.CEL	GSM206436.CEL	Ejection Fraction Heart Failure			F	heart	left ventricle
E-GEOD-8331	01/16/07	GSM206429.CEL	GSM206429.CEL	Congestive Heart Failure			M	heart	left ventricle
E-GEOD-8331	01/16/07	GSM206432.CEL	GSM206432.CEL	Congestive Heart Failure			F	heart	left ventricle
E-GEOD-8331	01/16/07	GSM206431.CEL	GSM206431.CEL	Congestive Heart Failure			M	heart	left ventricle
E-GEOD-8331	01/16/07	GSM206430.CEL	GSM206430.CEL	Congestive Heart Failure			M	heart	left ventricle
E-GEOD-8331	01/16/07	GSM206435.CEL	GSM206435.CEL	Ejection Fraction Heart Failure			F	heart	left ventricle
E-GEOD-8331	01/16/07	GSM206434.CEL	GSM206434.CEL	Ejection Fraction Heart Failure			F	heart	left ventricle
E-GEOD-8331	01/16/07	GSM206433.CEL	GSM206433.CEL	Ejection Fraction Heart Failure			F	heart	left ventricle
E-GEOD-8840	12/02/05	GSM219749.CEL	GSM219749.CEL	Rhabdomyosarcoma (RD) cancer cells			F	cell lines		TE617T
E-GEOD-8840	08/03/05	GSM219592.CEL	GSM219592.CEL	Rhabdomyosarcoma (RD) cancer cells			F	cell lines		SCMC-RMZ
E-GEOD-8840	08/03/05	GSM219745.CEL	GSM219745.CEL	Rhabdomyosarcoma (RD) cancer cells			F	cell lines		RH18
E-GEOD-8840	08/02/05	GSM219726.CEL	GSM219726.CEL	Rhabdomyosarcoma (RD) cancer cells			F	cell lines		RD
E-GEOD-8840	12/02/05	GSM219756.CEL	GSM219756.CEL	Rhabdomyosarcoma (RD) cancer cells			F	cell lines		RH4
E-GEOD-8840	11/01/06	GSM219757.CEL	GSM219757.CEL	Rhabdomyosarcoma (RD) cancer cells			M	cell lines		RH30
E-GEOD-8840	08/03/05	GSM219743.CEL	GSM219743.CEL	Rhabdomyosarcoma (RD) cancer cells			M	cell lines		RMS-YM
E-GEOD-8840	12/02/05	GSM219755.CEL	GSM219755.CEL	Rhabdomyosarcoma (RD) cancer cells			F	cell lines		RUCH-2
E-GEOD-8840	08/03/05	GSM219746.CEL	GSM219746.CEL	Rhabdomyosarcoma (RD) cancer cells			F	cell lines		RUCH3
E-GEOD-8840	08/03/05	GSM219593.CEL	GSM219593.CEL	Rhabdomyosarcoma (RD) cancer cells			F	cell lines		RMS
E-GEOD-8840	08/03/05	GSM219748.CEL	GSM219748.CEL	Rhabdomyosarcoma (RD) cancer cells			F	cell lines		RH41
E-GEOD-8840	08/03/05	GSM219747.CEL	GSM219747.CEL	Rhabdomyosarcoma (RD) cancer cells			M	cell lines		CW9019
E-GEOD-8840	12/02/05	GSM219750.CEL	GSM219750.CEL	Rhabdomyosarcoma (RD) cancer cells			M	cell lines		Hs729T
E-GEOD-9103	08/09/06	GSM230387.cel	GSM230387.cel	normal	sedentary	old	F	skeletal muscle	quadriceps
E-GEOD-9103	08/02/06	GSM230388.cel	GSM230388.cel	normal	sedentary	old	M	skeletal muscle	quadriceps
E-GEOD-9103	08/02/06	GSM230389.cel	GSM230389.cel	normal	sedentary	old	F	skeletal muscle	quadriceps
E-GEOD-9103	08/09/06	GSM230390.cel	GSM230390.cel	normal	sedentary	old	F	skeletal muscle	quadriceps
E-GEOD-9103	08/09/06	GSM230391.cel	GSM230391.cel	normal	sedentary	old	F	skeletal muscle	quadriceps
E-GEOD-9103	08/09/06	GSM230392.cel	GSM230392.cel	normal	sedentary	old	F	skeletal muscle	quadriceps
E-GEOD-9103	08/09/06	GSM230393.cel	GSM230393.cel	normal	sedentary	old	M	skeletal muscle	quadriceps
E-GEOD-9103	08/09/06	GSM230394.cel	GSM230394.cel	normal	sedentary	old	F	skeletal muscle	quadriceps
E-GEOD-9103	08/09/06	GSM230395.cel	GSM230395.cel	normal	sedentary	old	F	skeletal muscle	quadriceps
E-GEOD-9103	08/09/06	GSM230396.cel	GSM230396.cel	normal	sedentary	old	M	skeletal muscle	quadriceps
E-GEOD-9103	08/09/06	GSM230398.cel	GSM230398.cel	normal	trained	old	F	skeletal muscle	quadriceps	≥ 1 hour cycling or running 6 days/week over the past 4 years
E-GEOD-9103	08/02/06	GSM230399.cel	GSM230399.cel	normal	trained	old	M	skeletal muscle	quadriceps	≥ 1 hour cycling or running 6 days/week over the past 4 years
E-GEOD-9103	08/09/06	GSM230400.cel	GSM230400.cel	normal	trained	old	F	skeletal muscle	quadriceps	≥ 1 hour cycling or running 6 days/week over the past 4 years
E-GEOD-9103	08/09/06	GSM230401.cel	GSM230401.cel	normal	trained	old	F	skeletal muscle	quadriceps	≥ 1 hour cycling or running 6 days/week over the past 4 years
E-GEOD-9103	08/09/06	GSM230402.cel	GSM230402.cel	normal	trained	old	F	skeletal muscle	quadriceps	≥ 1 hour cycling or running 6 days/week over the past 4 years
E-GEOD-9103	08/02/06	GSM230403.cel	GSM230403.cel	normal	trained	old	F	skeletal muscle	quadriceps	≥ 1 hour cycling or running 6 days/week over the past 4 years
E-GEOD-9103	08/02/06	GSM230404.cel	GSM230404.cel	normal	trained	old	F	skeletal muscle	quadriceps	≥ 1 hour cycling or running 6 days/week over the past 4 years
E-GEOD-9103	08/02/06	GSM230405.cel	GSM230405.cel	normal	trained	old	F	skeletal muscle	quadriceps	≥ 1 hour cycling or running 6 days/week over the past 4 years
E-GEOD-9103	08/09/06	GSM230406.cel	GSM230406.cel	normal	trained	old	F	skeletal muscle	quadriceps	≥ 1 hour cycling or running 6 days/week over the past 4 years
E-GEOD-9103	08/02/06	GSM230408.cel	GSM230408.cel	normal	sedentary	young	F	skeletal muscle	quadriceps
E-GEOD-9103	08/02/06	GSM230409.cel	GSM230409.cel	normal	sedentary	young	F	skeletal muscle	quadriceps
E-GEOD-9103	08/09/06	GSM230410.cel	GSM230410.cel	normal	sedentary	young	M	skeletal muscle	quadriceps
E-GEOD-9103	08/09/06	GSM230411.cel	GSM230411.cel	normal	sedentary	young	F	skeletal muscle	quadriceps
E-GEOD-9103	08/09/06	GSM230412.cel	GSM230412.cel	normal	sedentary	young	F	skeletal muscle	quadriceps
E-GEOD-9103	08/09/06	GSM230413.cel	GSM230413.cel	normal	sedentary	young	M	skeletal muscle	quadriceps
E-GEOD-9103	08/09/06	GSM230414.cel	GSM230414.cel	normal	sedentary	young	F	skeletal muscle	quadriceps
E-GEOD-9103	08/09/06	GSM230415.cel	GSM230415.cel	normal	sedentary	young	M	skeletal muscle	quadriceps
E-GEOD-9103	08/09/06	GSM230416.cel	GSM230416.cel	normal	sedentary	young	F	skeletal muscle	quadriceps
E-GEOD-9103	08/02/06	GSM230417.cel	GSM230417.cel	normal	trained	young	M	skeletal muscle	quadriceps	≥ 1 hour cycling or running 6 days/week over the past 4 years
E-GEOD-9103	08/02/06	GSM230419.cel	GSM230419.cel	normal	trained	young	M	skeletal muscle	quadriceps	≥ 1 hour cycling or running 6 days/week over the past 4 years
E-GEOD-9103	08/02/06	GSM230420.cel	GSM230420.cel	normal	trained	young	M	skeletal muscle	quadriceps	≥ 1 hour cycling or running 6 days/week over the past 4 years
E-GEOD-9103	08/09/06	GSM230421.cel	GSM230421.cel	normal	trained	young	M	skeletal muscle	quadriceps	≥ 1 hour cycling or running 6 days/week over the past 4 years
E-GEOD-9103	08/09/06	GSM230422.cel	GSM230422.cel	normal	trained	young	F	skeletal muscle	quadriceps	≥ 1 hour cycling or running 6 days/week over the past 4 years
E-GEOD-9103	08/02/06	GSM230423.cel	GSM230423.cel	normal	trained	young	M	skeletal muscle	quadriceps	≥ 1 hour cycling or running 6 days/week over the past 4 years
E-GEOD-9103	08/02/06	GSM230424.cel	GSM230424.cel	normal	trained	young	F	skeletal muscle	quadriceps	≥ 1 hour cycling or running 6 days/week over the past 4 years
E-GEOD-9103	08/09/06	GSM230425.cel	GSM230425.cel	normal	trained	young	F	skeletal muscle	quadriceps	≥ 1 hour cycling or running 6 days/week over the past 4 years
E-GEOD-9103	08/09/06	GSM230426.cel	GSM230426.cel	normal	trained	young	M	skeletal muscle	quadriceps	≥ 1 hour cycling or running 6 days/week over the past 4 years
E-GEOD-9419	04/16/04	GSM239385.CEL	GSM239385.CEL	normal	Reported protein intake : 1.00 g/kg	32 years	M	skeletal muscle	quadriceps
E-GEOD-9419	04/22/04	GSM239410.CEL	GSM239410.CEL	normal	Reported protein intake : 0.75 g/kg	32 years	M	skeletal muscle	quadriceps
E-GEOD-9419	04/30/04	GSM239436.CEL	GSM239436.CEL	normal	Reported protein intake : 0.75 g/kg	71 years	M	skeletal muscle	quadriceps
E-GEOD-9419	04/16/04	GSM239389.CEL	GSM239389.CEL	normal	Reported protein intake : 0.75 g/kg	71 years	M	skeletal muscle	quadriceps
E-GEOD-9419	04/20/04	GSM239441.CEL	GSM239441.CEL	normal	Reported protein intake : 1.00 g/kg	71 years	M	skeletal muscle	quadriceps
E-GEOD-9419	04/29/04	GSM239397.CEL	GSM239397.CEL	normal	Reported protein intake :0.50 g/kg	32 years	M	skeletal muscle	quadriceps
E-GEOD-9419	04/27/04	GSM239402.CEL	GSM239402.CEL	normal	Reported protein intake : 0.75 g/kg	32 years	M	skeletal muscle	quadriceps
E-GEOD-9419	04/29/04	GSM239434.CEL	GSM239434.CEL	normal	Reported protein intake : 0.75 g/kg	71 years	M	skeletal muscle	quadriceps
E-GEOD-9419	04/20/04	GSM239432.CEL	GSM239432.CEL	normal	Reported protein intake : 0.75 g/kg	71 years	M	skeletal muscle	quadriceps
E-GEOD-9419	04/20/04	GSM239405.CEL	GSM239405.CEL	normal	Reported protein intake : 0.75 g/kg	32 years	M	skeletal muscle	quadriceps
E-GEOD-9419	04/27/04	GSM239413.CEL	GSM239413.CEL	normal	Reported protein intake : 1.00 g/kg	32 years	M	skeletal muscle	quadriceps
E-GEOD-9419	04/27/04	GSM239393.CEL	GSM239393.CEL	normal	Reported protein intake :0.50 g/kg	32 years	M	skeletal muscle	quadriceps
E-GEOD-9419	04/22/04	GSM239421.CEL	GSM239421.CEL	normal	Reported protein intake : 1.00 g/kg	32 years	M	skeletal muscle	quadriceps
E-GEOD-9419	04/27/04	GSM239423.CEL	GSM239423.CEL	normal	Reported protein intake :0.50 g/kg	71 years	M	skeletal muscle	quadriceps
E-GEOD-9419	04/30/04	GSM239399.CEL	GSM239399.CEL	normal	Reported protein intake :0.50 g/kg	32 years	M	skeletal muscle	quadriceps
E-GEOD-9419	04/27/04	GSM239439.CEL	GSM239439.CEL	normal	Reported protein intake : 1.00 g/kg	71 years	M	skeletal muscle	quadriceps
E-GEOD-9419	04/27/04	GSM239438.CEL	GSM239438.CEL	normal	Reported protein intake : 1.00 g/kg	71 years	M	skeletal muscle	quadriceps
E-GEOD-9419	04/20/04	GSM239394.CEL	GSM239394.CEL	normal	Reported protein intake :0.50 g/kg	32 years	M	skeletal muscle	quadriceps
E-GEOD-9419	04/22/04	GSM239424.CEL	GSM239424.CEL	normal	Reported protein intake :0.50 g/kg	71 years	M	skeletal muscle	quadriceps
E-GEOD-9419	04/30/04	GSM239444.CEL	GSM239444.CEL	normal	Reported protein intake : 1.00 g/kg	71 years	M	skeletal muscle	quadriceps
E-GEOD-9419	04/29/04	GSM239417.CEL	GSM239417.CEL	normal	Reported protein intake : 1.00 g/kg	32 years	M	skeletal muscle	quadriceps
E-GEOD-9419	04/29/04	GSM239427.CEL	GSM239427.CEL	normal	Reported protein intake :0.50 g/kg	71 years	M	skeletal muscle	quadriceps
E-GEOD-9419	04/20/04	GSM239440.CEL	GSM239440.CEL	normal	Reported protein intake : 1.00 g/kg	71 years	M	skeletal muscle	quadriceps
E-GEOD-9419	04/16/04	GSM239388.CEL	GSM239388.CEL	normal	Reported protein intake : 0.75 g/kg	71 years	M	skeletal muscle	quadriceps
E-GEOD-9419	04/27/04	GSM239403.CEL	GSM239403.CEL	normal	Reported protein intake : 0.75 g/kg	32 years	M	skeletal muscle	quadriceps
E-GEOD-9419	04/16/04	GSM239386.CEL	GSM239386.CEL	normal	Reported protein intake :0.50 g/kg	71 years	M	skeletal muscle	quadriceps
E-GEOD-9419	04/30/04	GSM239428.CEL	GSM239428.CEL	normal	Reported protein intake :0.50 g/kg	71 years	M	skeletal muscle	quadriceps
E-GEOD-9419	04/16/04	GSM239382.CEL	GSM239382.CEL	normal	Reported protein intake : 0.75 g/kg	32 years	M	skeletal muscle	quadriceps
E-GEOD-9419	04/22/04	GSM239411.CEL	GSM239411.CEL	normal	Reported protein intake : 0.75 g/kg	32 years	M	skeletal muscle	quadriceps
E-GEOD-9419	04/16/04	GSM239391.CEL	GSM239391.CEL	normal	Reported protein intake : 1.00 g/kg	71 years	M	skeletal muscle	quadriceps
E-GEOD-9419	04/29/04	GSM239396.CEL	GSM239396.CEL	normal	Reported protein intake :0.50 g/kg	32 years	M	skeletal muscle	quadriceps
E-GEOD-9419	04/22/04	GSM239420.CEL	GSM239420.CEL	normal	Reported protein intake : 1.00 g/kg	32 years	M	skeletal muscle	quadriceps
E-GEOD-9419	04/22/04	GSM239401.CEL	GSM239401.CEL	normal	Reported protein intake :0.50 g/kg	32 years	M	skeletal muscle	quadriceps
E-GEOD-9419	04/27/04	GSM239412.CEL	GSM239412.CEL	normal	Reported protein intake : 1.00 g/kg	32 years	M	skeletal muscle	quadriceps
E-GEOD-9419	04/27/04	GSM239430.CEL	GSM239430.CEL	normal	Reported protein intake : 0.75 g/kg	71 years	M	skeletal muscle	quadriceps
E-GEOD-9419	04/20/04	GSM239404.CEL	GSM239404.CEL	normal	Reported protein intake : 0.75 g/kg	32 years	M	skeletal muscle	quadriceps
E-GEOD-9419	04/20/04	GSM239414.CEL	GSM239414.CEL	normal	Reported protein intake : 1.00 g/kg	32 years	M	skeletal muscle	quadriceps
E-GEOD-9419	04/27/04	GSM239422.CEL	GSM239422.CEL	normal	Reported protein intake :0.50 g/kg	71 years	M	skeletal muscle	quadriceps
E-GEOD-9419	04/29/04	GSM239407.CEL	GSM239407.CEL	normal	Reported protein intake : 0.75 g/kg	32 years	M	skeletal muscle	quadriceps
E-GEOD-9419	04/30/04	GSM239429.CEL	GSM239429.CEL	normal	Reported protein intake :0.50 g/kg	71 years	M	skeletal muscle	quadriceps
E-GEOD-9419	04/30/04	GSM239419.CEL	GSM239419.CEL	normal	Reported protein intake : 1.00 g/kg	32 years	M	skeletal muscle	quadriceps
E-GEOD-9419	04/29/04	GSM239443.CEL	GSM239443.CEL	normal	Reported protein intake : 1.00 g/kg	71 years	M	skeletal muscle	quadriceps
E-GEOD-9419	04/29/04	GSM239416.CEL	GSM239416.CEL	normal	Reported protein intake : 1.00 g/kg	32 years	M	skeletal muscle	quadriceps
E-GEOD-9419	04/22/04	GSM239400.CEL	GSM239400.CEL	normal	Reported protein intake :0.50 g/kg	32 years	M	skeletal muscle	quadriceps
E-GEOD-9419	04/16/04	GSM239387.CEL	GSM239387.CEL	normal	Reported protein intake :0.50 g/kg	71 years	M	skeletal muscle	quadriceps
E-GEOD-9419	04/30/04	GSM239408.CEL	GSM239408.CEL	normal	Reported protein intake : 0.75 g/kg	32 years	M	skeletal muscle	quadriceps
E-GEOD-9419	04/20/04	GSM239425.CEL	GSM239425.CEL	normal	Reported protein intake :0.50 g/kg	71 years	M	skeletal muscle	quadriceps
E-GEOD-9419	04/29/04	GSM239435.CEL	GSM239435.CEL	normal	Reported protein intake : 0.75 g/kg	71 years	M	skeletal muscle	quadriceps
E-GEOD-9419	04/16/04	GSM239380.CEL	GSM239380.CEL	normal	Reported protein intake :0.50 g/kg	32 years	M	skeletal muscle	quadriceps
E-GEOD-9419	04/30/04	GSM239445.CEL	GSM239445.CEL	normal	Reported protein intake : 1.00 g/kg	71 years	M	skeletal muscle	quadriceps
E-GEOD-9419	04/29/04	GSM239426.CEL	GSM239426.CEL	normal	Reported protein intake :0.50 g/kg	71 years	M	skeletal muscle	quadriceps
E-GEOD-9419	04/30/04	GSM239409.CEL	GSM239409.CEL	normal	Reported protein intake : 0.75 g/kg	32 years	M	skeletal muscle	quadriceps
E-GEOD-9419	04/27/04	GSM239431.CEL	GSM239431.CEL	normal	Reported protein intake : 0.75 g/kg	71 years	M	skeletal muscle	quadriceps
E-GEOD-9419	04/20/04	GSM239415.CEL	GSM239415.CEL	normal	Reported protein intake : 1.00 g/kg	32 years	M	skeletal muscle	quadriceps
E-GEOD-9419	04/30/04	GSM239398.CEL	GSM239398.CEL	normal	Reported protein intake :0.50 g/kg	32 years	M	skeletal muscle	quadriceps
E-GEOD-9419	04/29/04	GSM239406.CEL	GSM239406.CEL	normal	Reported protein intake : 0.75 g/kg	32 years	M	skeletal muscle	quadriceps
E-GEOD-9419	04/16/04	GSM239383.CEL	GSM239383.CEL	normal	Reported protein intake : 0.75 g/kg	32 years	M	skeletal muscle	quadriceps
E-GEOD-9419	04/16/04	GSM239381.CEL	GSM239381.CEL	normal	Reported protein intake :0.50 g/kg	32 years	M	skeletal muscle	quadriceps
E-GEOD-9419	04/16/04	GSM239384.CEL	GSM239384.CEL	normal	Reported protein intake : 1.00 g/kg	32 years	M	skeletal muscle	quadriceps
E-GEOD-9419	04/30/04	GSM239437.CEL	GSM239437.CEL	normal	Reported protein intake : 0.75 g/kg	71 years	M	skeletal muscle	quadriceps
E-GEOD-9419	04/30/04	GSM239418.CEL	GSM239418.CEL	normal	Reported protein intake : 1.00 g/kg	32 years	M	skeletal muscle	quadriceps
E-GEOD-9419	04/20/04	GSM239433.CEL	GSM239433.CEL	normal	Reported protein intake : 0.75 g/kg	71 years	M	skeletal muscle	quadriceps
E-GEOD-9419	04/16/04	GSM239390.CEL	GSM239390.CEL	normal	Reported protein intake : 1.00 g/kg	71 years	M	skeletal muscle	quadriceps
E-GEOD-9419	04/29/04	GSM239442.CEL	GSM239442.CEL	normal	Reported protein intake : 1.00 g/kg	71 years	M	skeletal muscle	quadriceps
E-GEOD-9419	04/27/04	GSM239392.CEL	GSM239392.CEL	normal	Reported protein intake :0.50 g/kg	32 years	M	skeletal muscle	quadriceps
E-GEOD-9419	04/20/04	GSM239395.CEL	GSM239395.CEL	normal	Reported protein intake :0.50 g/kg	32 years	M	skeletal muscle	quadriceps
E-MEXP-2559	06/15/06	JPag-Ext-2-4-roed15-U133_Plus_2-a1.CEL	JPag.Ext.2.4.roed15.U133_Plus_2.a1.CEL	normal	first degree diabetes relatives	44 years	M	skeletal muscle	quadriceps	danish caucasian
E-MEXP-2559	08/22/06	JPag-Ext-2-8-roed7-U133_Plus_2-a1.CEL	JPag.Ext.2.8.roed7.U133_Plus_2.a1.CEL	normal	first degree diabetes relatives	44 years	M	skeletal muscle	quadriceps	danish caucasian
E-MEXP-2559	09/12/06	JPag-Ext-2-15-roed25-U133_Plus_2-a1.CEL	JPag.Ext.2.15.roed25.U133_Plus_2.a1.CEL	normal	first degree diabetes relatives	44 years	M	skeletal muscle	quadriceps	danish caucasian
E-MEXP-2559	06/08/06	JPag-Ext-2-1-roed2-U133_Plus_2-a1.CEL	JPag.Ext.2.1.roed2.U133_Plus_2.a1.CEL	normal	first degree diabetes relatives	44 years	M	skeletal muscle	quadriceps	danish caucasian
E-MEXP-2559	09/08/06	JPag-Ext-2-12-roed24-U133_Plus_2-a1.CEL	JPag.Ext.2.12.roed24.U133_Plus_2.a1.CEL	normal	first degree diabetes relatives	44 years	M	skeletal muscle	quadriceps	danish caucasian
E-MEXP-2559	06/15/06	JPag-Ext-2-3-roed11-U133_Plus_2-a1.CEL	JPag.Ext.2.3.roed11.U133_Plus_2.a1.CEL	normal	first degree diabetes relatives	44 years	M	skeletal muscle	quadriceps	danish caucasian
E-MEXP-2559	06/08/06	JPag-Ext-2-2-roed8-U133_Plus_2-a1.CEL	JPag.Ext.2.2.roed8.U133_Plus_2.a1.CEL	normal	first degree diabetes relatives	44 years	M	skeletal muscle	quadriceps	danish caucasian
E-MEXP-2559	09/12/06	JPag-Ext-2-14-roed18-U133_Plus_2-a1.CEL	JPag.Ext.2.14.roed18.U133_Plus_2.a1.CEL	normal	first degree diabetes relatives	44 years	M	skeletal muscle	quadriceps	danish caucasian
E-MEXP-2559	09/08/06	JPag-Ext-2-13-roed26-U133_Plus_2-a1.CEL	JPag.Ext.2.13.roed26.U133_Plus_2.a1.CEL	normal	first degree diabetes relatives	44 years	M	skeletal muscle	quadriceps	danish caucasian
E-MEXP-2559	08/22/06	JPag-Ext-2-7-roed4-U133_Plus_2-a1.CEL	JPag.Ext.2.7.roed4.U133_Plus_2.a1.CEL	normal	first degree diabetes relatives	44 years	M	skeletal muscle	quadriceps	danish caucasian
E-MEXP-2559	08/22/06	JPag-Ext-2-9-roed17-U133_Plus_2-a1.CEL	JPag.Ext.2.9.roed17.U133_Plus_2.a1.CEL	normal	first degree diabetes relatives	44 years	M	skeletal muscle	quadriceps	danish caucasian
E-MEXP-2559	06/15/06	JPag-Ext-2-5-roed20-U133_Plus_2-a1.CEL	JPag.Ext.2.5.roed20.U133_Plus_2.a1.CEL	normal	first degree diabetes relatives	44 years	M	skeletal muscle	quadriceps	danish caucasian
E-MEXP-2559	08/22/06	JPag-Ext-2-6-roed1-U133_Plus_2-a1.CEL	JPag.Ext.2.6.roed1.U133_Plus_2.a1.CEL	normal	first degree diabetes relatives	44 years	M	skeletal muscle	quadriceps	danish caucasian
E-MEXP-2559	09/08/06	JPag-Ext-2-11-roed22-U133_Plus_2-a1.CEL	JPag.Ext.2.11.roed22.U133_Plus_2.a1.CEL	normal	first degree diabetes relatives	44 years	M	skeletal muscle	quadriceps	danish caucasian
E-MEXP-2559	09/08/06	JPag-Ext-2-10-roed16-U133_Plus_2-a1.CEL	JPag.Ext.2.10.roed16.U133_Plus_2.a1.CEL	normal	first degree diabetes relatives	44 years	M	skeletal muscle	quadriceps	danish caucasian
E-MEXP-2559	08/22/06	JPag-Ext-3-10-groen16-U133_Plus_2-a1.CEL	JPag.Ext.3.10.groen16.U133_Plus_2.a1.CEL	normal		45 years	M	skeletal muscle	quadriceps	danish caucasian
E-MEXP-2559	09/12/06	JPag-Ext-3-15-groen31-U133_Plus_2-a1.CEL	JPag.Ext.3.15.groen31.U133_Plus_2.a1.CEL	normal		45 years	M	skeletal muscle	quadriceps	danish caucasian
E-MEXP-2559	09/08/06	JPag-Ext-3-11-groen11-U133_Plus_2-a1.CEL	JPag.Ext.3.11.groen11.U133_Plus_2.a1.CEL	normal		45 years	M	skeletal muscle	quadriceps	danish caucasian
E-MEXP-2559	09/08/06	JPag-Ext-3-14-groen24-U133_Plus_2-a1.CEL	JPag.Ext.3.14.groen24.U133_Plus_2.a1.CEL	normal		45 years	M	skeletal muscle	quadriceps	danish caucasian
E-MEXP-2559	06/08/06	JPag-Ext-3-2-groen6-U133_Plus_2-a1.CEL	JPag.Ext.3.2.groen6.U133_Plus_2.a1.CEL	normal		45 years	M	skeletal muscle	quadriceps	danish caucasian
E-MEXP-2559	09/08/06	JPag-Ext-3-12-groen22-U133_Plus_2-a1.CEL	JPag.Ext.3.12.groen22.U133_Plus_2.a1.CEL	normal		45 years	M	skeletal muscle	quadriceps	danish caucasian
E-MEXP-2559	06/08/06	JPag-Ext-3-1-groen4-U133_Plus_2-a1.CEL	JPag.Ext.3.1.groen4.U133_Plus_2.a1.CEL	normal		45 years	M	skeletal muscle	quadriceps	danish caucasian
E-MEXP-2559	06/15/06	JPag-Ext-3-6-groen9-U133_Plus_2-a1.CEL	JPag.Ext.3.6.groen9.U133_Plus_2.a1.CEL	normal		45 years	M	skeletal muscle	quadriceps	danish caucasian
E-MEXP-2559	08/22/06	JPag-Ext-3-9-groen13-U133_Plus_2-a1.CEL	JPag.Ext.3.9.groen13.U133_Plus_2.a1.CEL	normal		45 years	M	skeletal muscle	quadriceps	danish caucasian
E-MEXP-2559	08/22/06	JPag-Ext-3-8-groen12-U133_Plus_2-a1.CEL	JPag.Ext.3.8.groen12.U133_Plus_2.a1.CEL	normal		45 years	M	skeletal muscle	quadriceps	danish caucasian
E-MEXP-2559	09/12/06	JPag-Ext-3-16-groen37-U133_Plus_2-a1.CEL	JPag.Ext.3.16.groen37.U133_Plus_2.a1.CEL	normal		45 years	M	skeletal muscle	quadriceps	danish caucasian
E-MEXP-2559	06/08/06	JPag-Ext-3-3-groen7-U133_Plus_2-a1.CEL	JPag.Ext.3.3.groen7.U133_Plus_2.a1.CEL	normal		45 years	M	skeletal muscle	quadriceps	danish caucasian
E-MEXP-2559	09/08/06	JPag-Ext-3-13-groen23-U133_Plus_2-a1.CEL	JPag.Ext.3.13.groen23.U133_Plus_2.a1.CEL	normal		45 years	M	skeletal muscle	quadriceps	danish caucasian
E-MEXP-2559	06/15/06	JPag-Ext-3-4-groen1-U133_Plus_2-a1.CEL	JPag.Ext.3.4.groen1.U133_Plus_2.a1.CEL	normal		45 years	M	skeletal muscle	quadriceps	danish caucasian
E-MEXP-2559	06/15/06	JPag-Ext-3-5-groen5-U133_Plus_2-a1.CEL	JPag.Ext.3.5.groen5.U133_Plus_2.a1.CEL	normal		45 years	M	skeletal muscle	quadriceps	danish caucasian
E-MEXP-2559	06/15/06	JPag-Ext-1-4-gul6-U133_Plus_2-a1.CEL	JPag.Ext.1.4.gul6.U133_Plus_2.a1.CEL	type 2 diabetes (DM2)		52 years	M	skeletal muscle	quadriceps	danish caucasian
E-MEXP-2559	06/15/06	JPag-Ext-1-5-gul7-U133_Plus_2-a1.CEL	JPag.Ext.1.5.gul7.U133_Plus_2.a1.CEL	type 2 diabetes (DM2)		52 years	M	skeletal muscle	quadriceps	danish caucasian
E-MEXP-2559	06/08/06	JPag-Ext-1-3-gul5-U133_Plus_2-a1.CEL	JPag.Ext.1.3.gul5.U133_Plus_2.a1.CEL	type 2 diabetes (DM2)		52 years	M	skeletal muscle	quadriceps	danish caucasian
E-MEXP-2559	06/08/06	JPag-Ext-1-2-gul3-U133_Plus_2-a1.CEL	JPag.Ext.1.2.gul3.U133_Plus_2.a1.CEL	type 2 diabetes (DM2)		52 years	M	skeletal muscle	quadriceps	danish caucasian
E-MEXP-2559	06/08/06	JPag-Ext-1-1-gul2-U133_Plus_2-a1.CEL	JPag.Ext.1.1.gul2.U133_Plus_2.a1.CEL	type 2 diabetes (DM2)		52 years	M	skeletal muscle	quadriceps	danish caucasian
E-MEXP-2971	05/28/08	5_28E2.CEL	X5_28E2.CEL	17β-estradiol-treated (E2)		79 years	F	heart	atrium
E-MEXP-2971	05/28/08	7_34E2.CEL	X7_34E2.CEL	17β-estradiol-treated (E2)		73 years	F	heart	atrium
E-MEXP-2971	05/28/08	9_41E2.CEL	X9_41E2.CEL	17β-estradiol-treated (E2)		81 years	F	heart	atrium
E-MEXP-2971	05/28/08	6_34HBC.CEL	X6_34HBC.CEL	2-hydroxypropyl-β-cyclodextrin-treated (HBC)		73 years	F	heart	atrium
E-MEXP-2971	05/28/08	4_28HBC.CEL	X4_28HBC.CEL	2-hydroxypropyl-β-cyclodextrin-treated (HBC)		79 years	F	heart	atrium
E-MEXP-2971	05/28/08	8_41HBC.CEL	X8_41HBC.CEL	2-hydroxypropyl-β-cyclodextrin-treated (HBC)		81 years	F	heart	atrium
E-MEXP-2971	05/28/08	11_16E2.CEL	X11_16E2.CEL	17β-estradiol-treated (E2)		61 years	M	heart	atrium
E-MEXP-2971	05/28/08	3_42E2.CEL	X3_42E2.CEL	17β-estradiol-treated (E2)		69 years	M	heart	atrium
E-MEXP-2971	05/28/08	13_26E2.CEL	X13_26E2.CEL	17β-estradiol-treated (E2)		56 years	M	heart	atrium
E-MEXP-2971	05/28/08	1_16HBC.CEL	X1_16HBC.CEL	2-hydroxypropyl-β-cyclodextrin-treated (HBC)		61 years	M	heart	atrium
E-MEXP-2971	05/23/08	12_26HBC.CEL	X12_26HBC.CEL	2-hydroxypropyl-β-cyclodextrin-treated (HBC)		56 years	M	heart	atrium
E-MEXP-2971	05/28/08	2_42HBC.CEL	X2_42HBC.CEL	2-hydroxypropyl-β-cyclodextrin-treated (HBC)		69 years	M	heart	atrium
E-MEXP-3761	02/15/12	Faivre_base_7.CEL	Faivre_base_7.CEL	two recessively-inherited mutations in LPIN1			M	myotube
[truncated: 229 more rows]
